# Supplementary material for: Quantification of protein abundance and interaction defines a mechanism for operation of the circadian clock
Source: eLife. 2022 Mar 14;11:e73976. doi: 10.7554/eLife.73976 (PMC8983044; doi:10.7554/eLife.73976)
Supplement: Figure 1—figure supplement 1—source data 1. [file elife-73976-fig1-figsupp1-data1.xlsx]

## Sheet: Overview - main figures
	*List of summary statistics appearing in the main manuscript figures
	Figure	experiment	Parameter	Condtion	N = mice/ separate samples	n = total cells analysed	mean	SD	95% CI mean	median	Lower 95% CI median	Upper 95% CI median
	1F	FRAP of BMAL1	KOFF	BMAL1 (WT)	3	69	0.904	0.4305	0.103	0.8174	0.8006	1.007
				BMAL1 (WT) + CLOCK	3	58	4.134	2.176	0.572	3.815	3.562	4.706
				BMAL1 (L95E) + CLOCK	3	51	2.83	1.9	0.535	2.094	2.296	3.365
	2B	FCS	Diffusion	BMAL1	3	173	1.535	0.9657	0.145	1.338	1.17	1.59
		FCS of BMAL1		BMAL1 + CLOCK	4	198	0.1956	0.1415	0.199	0.1603	0.1411	0.1818
		FCS		CLOCK	3	152	4.343	3.021	0.485	3.689	3.192	4.111
		FCS of CLOCK		BMAL1 + CLOCK	4	185	1.472	1.173	0.171	1.119	0.9695	1.34
	2C	FCS of BMAL1	Diffusion	BMAL1 (WT) + CLOCK	4	198	0.1956	0.1415	0.199	0.1603	0.1411	0.1818
				BMAL1 (L95E) + CLOCK	4	227	0.4146	0.2341	0.0306	0.3701	0.3446	0.3985
	2G	Compare KD fits	Dissociation constant	BMAL1 (WT) + CLOCK	4	156	147.6	9.8
				BMAL1 (L95E) + CLOCK	4	274	147.71	7.49
				BMAL1 (V435R) + CLOCK	3	244	200.81	13.86
	3C	Fluorescence of SCN CRY1			6	NA	23.94	0.62
	3E	Luminescence recording of PER2::LUC in lung fibroblasts			3	NA	23.31	1.14
	4B	FCS of BMAL1 x CRY1	Concentration	T24 post dex (BMAL1)	3	144	24.52	10.94	1.81	21.78	20.83	23.13
				T28 post dex (BMAL1)	3	150	22.59	13.51	2.18	19.27	17.89	20.21
				T32 post dex (BMAL1)	3	197	27.93	19.87	2.79	20.78	19.24	22.2
				T36 post dex (BMAL1)	3	133	27.69	10.87	1.87	25.65	24.09	27.44
				T40 post dex (BMAL1)	3	175	46.41	50.45	7.53	31.72	29.77	34.48
				T44 post dex (BMAL1)	3	121	27.7	8.804	1.58	26.33	24.38	28.14
				T48 post dex (BMAL1)	3	134	24.39	10.98	1.88	22.6	20.07	24.77
				T24 post dex (CRY1)	3	144	5.877	3.052	0.503	4.981	4.709	5.736
				T28 post dex (CRY1)	3	150	5.718	2.714	0.438	5.144	4.797	5.837
				T32 post dex (CRY1)	3	197	7.283	6.716	0.944	5.718	5.315	6.646
				T36 post dex (CRY1)	3	132	6.256	4.162	0.717	5.398	4.903	5.962
				T40 post dex (CRY1)	3	175	6.686	3.958	0.59	5.932	5.262	6.368
				T44 post dex (CRY1)	3	121	6.099	3.137	0.565	5.237	4.742	6.365
				T48 post dex (CRY1)	3	135	6.553	3.546	0.603	5.641	5.156	6.231
	4C	FCS of BMAL1 x CRY1	Diffusion	T24 post dex (BMAL1)	3	144	0.5879	0.2577	0.0425	0.5472	0.5092	0.6032
				T28 post dex (BMAL1)	3	148	0.5777	0.2584	0.042	0.5289	0.4799	0.6036
				T32 post dex (BMAL1)	3	194	0.5416	0.2493	0.0353	0.4891	0.4486	0.5391
				T36 post dex (BMAL1)	3	132	0.6042	0.2705	0.0466	0.5394	0.4948	0.6277
				T40 post dex (BMAL1)	3	165	0.5363	0.2682	0.0412	0.4875	0.4367	0.5371
				T44 post dex (BMAL1)	3	122	0.6037	0.2397	0.0429	0.585	0.5437	0.6403
				T48 post dex (BMAL1)	3	132	0.5974	0.2393	0.0412	0.5861	0.5128	0.6305
				T24 post dex (CRY1)	3	144	0.5879	0.2577	0.503	0.5472	0.5092	0.6032
				T28 post dex (CRY1)	3	150	0.5777	0.2584	0.438	0.5289	0.4799	0.6036
				T32 post dex (CRY1)	3	197	0.5416	0.2493	0.944	0.4891	0.4486	0.5391
				T36 post dex (CRY1)	3	132	0.6042	0.2705	0.717	0.5394	0.4948	0.6277
				T40 post dex (CRY1)	3	175	0.5363	0.2682	0.59	0.4875	0.4367	0.5371
				T44 post dex (CRY1)	3	121	0.6037	0.2397	0.565	0.585	0.5437	0.6403
				T48 post dex (CRY1)	3	135	0.5974	0.2393	0.603	0.5861	0.5128	0.6305
	4E	Interaction	Interaction	T24	3	136	46.8025	2.22767
				T28	3	143	38.8119	2.08852
				T32	3	173	52.4222	3.42195
				T36	3	131	51.6505	2.35143
				T40	3	158	65.1135	3.35842
				T44	3	121	54.1786	2.83209
				T48	3	132	41.7195	2.26619
	5B	PER:CRY1 diffusion	FCS	PER2	3	153	0.1969	0.1006	0.016	0.1863	0.163	0.2055
				CRY1	3	159	1.135	0.7526	0.118	1.027	0.8038	1.168
			FCS of PER2	PER2 + CRY1	3	212	0.187	0.1087	0.0147	0.1662	0.1546	0.1781
			FCS of CRY1	PER2 + CRY1	3	233	0.233	0.1473	0.0191	0.2026	0.1821	0.2353
	6B	FRAP of BMAL1	KOFF	T24	4	69	3.171	1.633	0.392	2.99	2.511	3.495
				T28	4	92	2.692	1.838	0.381	2.532	1.986	2.773
				T32	4	108	2.471	1.364	0.26	2.28	1.965	2.583
				T36	4	84	2.725	1.232	0.268	2.335	2.163	2.826
				T40	4	107	3.125	1.663	0.319	2.76	2.519	3.014
				T44	4	90	2.98	1.584	0.332	2.742	2.27	2.993
				T48	4	86	2.649	1.258	0.27	2.484	1.982	2.851

## Sheet: Overview - supplementary fi
	*List of summary statistics appearing in the supplementary figures
	Figure	experiment	Parameter	Condtion	N = mice/ separate samples	n = total cells analysed	mean	SD	95% CI mean	median	Lower 95% CI median	Upper 95% CI median
	Fig1-S1B	smFISH	BMAL1 mRNA	WT	3	201	6.955	4.766	0.663	6	6	7
			BMAL1 mRNA	lentiviral Bmal1 (LV1)	>3	186	570	357.2	51.6	520	459	572
			CLOCK mRNA	WT	>3	2177	27.95	34.23	1.44	25	26.51	29.39
			CLOCK mRNA	lentiviral Clock (LV1)	3	151	213.8	140	22.5	183	191.3	236.3
	Fig2-S2D	Interaction	Interaction	GFP::CLOCK + BMAL1::RFP	15	1109	144.938	4.81059
	Fig2-S2E	Nuclear Molecular Ratios	BMAL1 (WT) + CLOCK		4	218	1.982	0.816	0.109	1.866	1.781	1.958
			BMAL1 (L95E) + CLOCK		3	270	1.641	1.064	0.127	1.337	1.258	1.465
			BMAL1 (V435R) + CLOCK		3	255	4.561	2.797	0.345	3.747	3.519	4.015
	Fig3-S1C	Wheel running	Period LD	"+/+"	10	NA	23.97	0.0483
				"+/R"	10	NA	24	0
				"R/R	13	NA	23.92	0.1345
			Period DD	"+/+"	10	NA	23.99	0.137
				"+/R"	10	NA	24.06	0.2066
				"R/R	13	NA	23.98	0.2375
	Fig4-S1B	FRAP of BMAL1	KOFF	Aveolar macrophages	3	42	2.503	2.098	0.654	2.08	1.524	2.42
				BMDM	2	87	3.176	2.402	0.512	2.625	2.025	2.865
				PECS	3	61	3.663	2.027	0.519	3.351	2.832	3.975
				Lung Fibroblasts	4	35	5.893	2.322	0.798	5.777	4.739	6.887
				Chondrocytes	4	73	2.974	2.308	0.538	2.04	1.82	2.938
	Fig4-S1C	FCS of BMAL1	Diffusion	Aveolar macrophages	3	93	0.1111	0.06212	0.01282	0.1012	0.0846	0.1109
				BMDM	2	149	0.1806	0.09424	0.0153	0.1779	0.1513	0.1944
				PECS	3	148	0.1159	0.06009	0.0098	0.1121	0.09792	0.1204
				Lung Fibroblasts	4	1644	0.3034	0.1349	0.0065	0.2744	0.2674	0.2817
				MEFs	Yang et al	207	2.553	2.219	0.304	1.585	1.42	1.855
				Chondrocytes	Yang et al	142	1.033	0.7515	0.1242	0.7838	0.71	0.8773
	Fig4-S1D	FCS of BMAL1	Concentration	Aveolar macrophages	3	107	9.181	3.653	0.7	8.288	7.635	9.444
				BMDM	2	142	7.247	2.413	0.4	6.692	6.279	7.423
				PECS	3	156	10.29	4.422	0.698	9.807	8.748	10.87
				Lung Fibroblasts	4	1597	12.06	4.031	0.2	11.31	11.07	11.52
				MEFs	Yang et al	243	6.002	3.939	0.498	4.866	3.973	5.887
				Chondrocytes	Yang et al	172	6.039	3.551	0.535	5.706	4.606	6.624
	Fig4-S1E	Nuclear Volumes	Nuclear Volumes	Aveolar macrophages	1	84	546.7	216.1	21.9	490.9	458.2	532.1
				BMDM	1	115	327.1	173.8	32.1	298.8	280	340.1
				PECS	1	27	320.4	92.15	36.4	290	258.6	314.9
				Lung Fibroblasts	1	169	926.1	437.9	66.5	812.5	750.1	880.4
				MEFs	Yang et al	9	256.5	28.52	21.9	256.5	233.8	269.5
				Chondrocytes	Yang et al	30	147.4	43.42	16.2	143.2	117.7	161
	Fig 4-S1F	Molecules per nucleus	Molecules per nucleus	Aveolar macrophages		NA	2966.94	1721.04
				BMDM		NA	1427.46	895.072
				PECS		NA	1985.84	1026.74
				Lung Fibroblasts		NA	6746.64	3890.69
				MEFs		NA	2556.51	1701.7
				Chondrocytes		NA	1478.19	972.144
