# Supplementary material for: Quantification of protein abundance and interaction defines a mechanism for operation of the circadian clock
Source: eLife. 2022 Mar 14;11:e73976. doi: 10.7554/eLife.73976 (PMC8983044; doi:10.7554/eLife.73976)
Supplement: Figure 1—source data 1. [file elife-73976-fig1-data1.csv]

1.985308716	6.715916723	0.197191986
3.803727653	4.025764895	0.632751202
3.549875754	2.551671345	0.398899039
0.844737287	7.315288954	1.068947087
7.315288954	4.178854994	1.210214208
5.120327701	1.829491401	1.048218029
3.954132068	1.931993818	1.107174491
1.461560947	1.804402743	0.997705278
1.679261125	2.424830262	1.247816321
7.645259939	1.985308716	0.6177797
7.072135785	3.444712367	0.590772139
5.385029618	2.467308167	0.812413681
6.443298969	1.81192245	0.393545848
6.443298969	4.205214466	0.537258905
1.365933616	2.403846154	0.59562809
2.470355731	3.646973012	0.982221786
11.52073733	4.739336493	1.011531459
6.570302234	1.771479185	0.794155019
2.534854246	2.794076558	0.39602392
4.66853408	1.892147588	0.942862531
2.826455625	2.397506593	1.831837333
2.012072435	1.384657989	0.589692181
3.196930946	3.461405331	0.865875833
1.916075877	3.610108303	0.80554213
7.132667618	1.990049751	1.370989855
2.162629758	5.524861878	0.378931413
2.206531333	3.096934035	1.442793248
8.488964346	0.712199986	0.609644577
3.631082062	2.253267237	1.267748479
1.588057805	1.640150894	0.440761636
3.037667072	1.684919966	0.791201836
2.808988764	4.125412541	0.628298567
4.428697963	0.754887899	0.560067208
3.827018752	2.306805075	0.962741889
7.843137255	2.093802345	0.907441016
2.871088142	0.826036676	0.440373437
3.554923569	1.713502399	0.68747422
4.180602007	3.170577045	1.970055162
3.161555485	6.414368185	1.132887731
3.331112592	1.61498708	0.722595563
6.285355123	1.606683805	0.961815908
1.422070535	1.528117359	1.26710593
4.07996736	10.90512541	0.599053495
2.871088142	1.138433515	1.095530237
2.025111381	2.014504432	0.620116582
4.580852038	1.684636119	0.421602934
4.401408451	2.032520325	0.750694392
6.844626968	1.149821778	0.585411544
2.580645161	2.043735949	1.267909218
5.302226935	4.428697963	0.590318772
6.075334143	1.104118361	1.012145749
1.577287066		0.194984986
5.698005698		0.604412209
2.019386107		1.168497312
4.073319756		0.520996145
4.508566276		1.177995052
4.199916002		1.189343482
5.200208008		2.397506593
		1.212268154
		0.193580859
		0.964227172
		1.112099644
		1.91424196
		1.416631251
		1.310787783
		1.480165779
		0.761904762
		0.817394147
		0.778210117
