# Supplementary material for: Quantification of protein abundance and interaction defines a mechanism for operation of the circadian clock
Source: eLife. 2022 Mar 14;11:e73976. doi: 10.7554/eLife.73976 (PMC8983044; doi:10.7554/eLife.73976)
Supplement: Figure 2—source data 1. [file elife-73976-fig2-data1.csv]

LV2 Bmal1	LV2 Clock	LV2 L95E	LV2 Clock L95E	LV1 Bmal1	LV1 Clock	LV2 V435R	LV2 CLOCK V435R
0.01252	0.125212	0.66148	2.095445	0.702758	6.09713	0.078576	1.386361
0.10268	0.097195	0.714975	2.182197	0.938443	4.093278	0.530827	2.472801
0.129492	2.193178	0.353101	1.630215	1.592484	0.39322	0.224626	1.999489
0.034414	4.719969	0.342436	4.062523	1.585162	3.586827	0.062648	0.627939
0.005077	0.675568	0.632549	3.522647	2.678847	4.883327	0.317511	1.298398
0.188353	1.301841	0.494502	0.714335	1.169924	2.846391	0.334332	4.795457
0.225779	1.665168	0.527025	0.91017	1.832428	4.070893	0.149372	1.317521
0.413424	0.336864	0.370063	0.892698	0.542675	6.33574	0.241275	4.08972
0.262622	0.430645	0.482157	1.768145	0.275202	2.312407	0.073177	3.024917
0.360453	0.199755	0.222336	1.002503	1.426475	1.9978	0.208654	3.077491
0.258693	1.877535	0.030747	1.046139	1.743193	2.765212	0.126929	1.825454
0.146811	0.909414	0.362756	2.37071	1.086711	0.710963	0.07825	2.577121
0.043477	0.502958	0.197464	1.29059	0.693849	2.699686	0.177983	1.722427
0.174709	0.618631	0.259379	0.928978	2.71336	3.151351	0.084683	4.028324
0.157797	0.488911	0.483645	0.897449	0.904457	4.066348	0.156478	1.156154
0.12739	0.894122	0.17025	0.669397	1.676118	3.527185	0.253927	1.062263
0.097866	5.001622	0.17952	5.56941	1.271144	1.8293	0.123922	1.812155
0.119076	2.940005	0.722541	2.052473	1.018232	3.675592	0.091153	3.901278
0.011591	2.473804	0.17857	1.467781	3.349572	2.123377	0.333041	4.059156
0.159633	1.656854	0.116685	0.266241	1.60105	1.749464	0.053369	7.895086
0.356492	0.680717	0.341775	2.439505	1.247659	5.123139	0.231579	3.013343
0.12298	0.205155	0.576164	0.565128	1.654454	3.739574	0.152245	2.249299
0.129379	1.118896	1.009743	1.702111	3.000753	2.741424	0.214253	1.426186
0.079696	1.023971	0.733693	0.903277	1.611734	3.136891	0.191716	3.967596
0.050306	1.135167	0.671243	2.794276	2.887118	2.762519	0.132362	2.223566
0.213332	3.616208	0.707209	1.932662	0.485551	0.867357	0.135016	1.390295
0.2735	0.920347	0.187063	1.222715	0.591693	2.540039	0.502138	2.651186
0.239155	1.162212	0.012657	0.758762	2.265787	2.237793	0.088394	1.966924
0.603104	1.552667	0.242212	0.628512	1.673559	4.818335	0.089732	2.679852
0.229524	0.740305	0.196743	1.44421	0.005457	1.934035	0.264918	2.209647
0.177934	4.101649	0.542958	1.172086	1.625157	2.247316	0.146297	3.040509
0.210756	1.495246	0.342443	4.810597	1.177494	3.8759	0.21721	3.898816
0.402852	3.040026	0.243084	0.80847	2.036148	1.9726	0.172373	1.497991
0.568087	1.077711	0.409159	1.454359	1.609574	13.24732	0.124243	6.566902
0.105783	2.124568	1.024362	4.703939	1.537153	1.05722	0.124321	5.418854
0.12504	0.786667	0.204343	2.106828	2.672778	0.71521	0.225815	5.223579
0.357531	3.466819	0.105645	1.026412	3.34448	13.63244	0.122404	5.667294
0.419052	0.689881	0.383718	2.627747	0.008242	0.539671	0.308077	2.888454
0.229373	2.355733	0.24938	4.402041	1.528987	6.734377	0.19338	2.7906
0.29318	0.929104	0.322021	0.70505	0.531471	12.84583	0.146515	3.770132
0.262339	2.032303	0.245827	0.681284	2.66356	1.4713	0.260112	3.760035
0.218276	0.17873	0.460818	0.828919	1.672342	5.233656	0.152881	4.457355
0.141068	0.33632	0.473919	1.370712	1.170935	6.331178	0.026452	4.150679
0.181781	0.417712	0.811304	1.071537	1.814556	6.871213	0.103958	3.943113
0.14507	0.174214	0.518159	1.938073	1.306784	11.65386	0.004707	4.613777
0.468097	0.337628	0.034288	0.89513	0.407311	11.03107	0.427431	4.923894
0.486323	1.131665	0.21891	0.299924	1.181234	2.570556	0.10798	6.283907
0.078673	0.675604	0.210986	0.977075	0.885126	3.221982	0.260141	2.006861
0.255174	0.673646	0.337246	0.51394	3.643348	5.183303	0.202611	1.638588
0.309881	2.435984	0.229768	1.97344	3.776145	5.232817	0.115985	4.599812
0.138213	1.549596	0.326879	1.406544	0.343807	3.086164	0.042419	2.352602
0.198017	0.902303	0.003305	1.113495	0.547991	4.350097	0.078996	2.249706
0.149737	0.839805	0.096004	3.583417	1.014743	10.58007	0.415212	3.290334
0.265618	0.251609	1.074712	0.042996	1.016324	2.647668	0.144858	1.557968
0.137965	0.605178	0.172284	0.39262	0.98462	7.769252	0.12105	5.894687
0.070137	1.111464	0.148123	1.249453	1.915573	3.818013	0.057786	2.746809
0.138443	1.972996	0.325645	0.182037	2.562498	5.02048	0.219518	0.888301
0.35531	0.979024	0.474641	3.767185	1.45246	4.817452	0.345357	2.30447
0.275549	1.001456	0.264259	0.526141	1.732809	4.572637	0.132581	2.646881
0.358237	0.765955	0.422582	0.719391	0.613038	4.909097	0.284032	6.262312
0.135816	0.513076	0.39296	0.502137	2.452258	3.772438	0.105961	3.581919
0.104275	0.29061	0.61112	0.896076	1.830522	4.153577	0.178639	2.868016
0.047847	0.325687	0.594019	0.913319	2.41085	12.93353	0.272895	0.897457
0.049043	0.139062	0.204141	1.4078	1.438291	5.730439	0.268357	2.935898
0.148835	3.084468	0.354779	1.21852	0.702166	8.769982	0.343442	6.517669
0.178575	1.66155	0.444839	0.94486	0.782545	12.91128	0.431315	2.288503
0.113321	1.378553	0.403559	3.399291	0.638111	5.713827	0.130753	2.228174
0.417516	0.091694	0.524274	2.165482	0.542539	0.581882	0.186167	2.149035
0.160107	3.153868	0.487037	0.346338	0.761823	2.306828	0.114682	1.588024
0.068775	3.05908	0.084691	4.625823	2.75512	3.759373	0.099108	2.691375
0.083426	0.538987	0.108438	3.667483	1.619781	4.031617	0.114112	1.791431
0.025038	2.628012	0.325607	0.955222	1.601107	11.66621	0.108576	3.620413
0.171195	3.082094	1.031567	1.226274	2.359624	3.221915	0.010298	3.836672
0.103481	0.318663	0.517234	4.085852	2.218335	10.47022	0.201669	2.138481
0.104754	1.526539	0.286627	5.169053	2.892024	2.565628	0.474036	2.593992
0.092446	0.969512	0.543691	3.489831	2.207964	4.448395	0.151576	3.169357
0.00854	0.548855	0.596531	1.416147	0.609415	11.12139	0.135024	2.752438
0.046706	1.181738	0.712972	1.075636	1.087616	6.948634	0.123883	4.105799
0.217942	1.109859	0.616534	2.725512	0.681152	4.478957	0.07826	3.918568
0.14762	2.344026	0.686042	1.105585	0.996392	7.523822	0.098567	2.268294
0.252503	2.340523	0.2443	1.773174	2.039292	1.556565	0.493441	5.682354
0.139067	1.339844	0.203225	2.872162	0.779207	5.588035	0.247223	1.844634
0.157953	2.935693	0.603155	2.221955	0.439582	2.175679	0.082415	3.702292
0.379741	0.140947	0.47295	2.532832	1.088725	4.219986	0.29797	1.097547
0.224475	0.45609	0.391366	1.15391	1.31752	11.67277	0.038833	2.152118
0.174732	1.772578	0.997838	0.866919	1.411453	5.222772	0.181249	1.8948
0.12167	0.677534	0.209455	0.632906	1.948364	5.293814	0.125317	5.534789
0.233323	1.904297	0.21704	1.234324	0.890035	1.480154	0.095749	4.18326
0.242629	4.15312	0.466479	3.977438	0.972836	4.99327	0.470696	7.852973
0.023637	1.355188	0.31243	5.188375	1.58959	6.027223	0.165897	2.607792
0.302303	0.942101	0.303606	3.693954	2.810464	1.276948	0.061429	3.336979
0.193062	1.396367	0.442493	3.427392	2.144378	2.062907	0.098902	2.071555
0.028868	1.089891	0.80488	4.433058	2.330014	12.43548	0.076876	3.420882
0.144228	4.228271	0.216049	3.561731	3.908129	2.507986	0.4337	2.329942
0.371486	3.078954	0.612177	1.62552	3.745454	0.91427	0.110745	4.280426
0.268515	1.339876	0.510037	2.643267	1.996133	1.321721	0.041153	3.257962
0.167354	2.161656	0.457794	2.321435	0.90119	2.154099	0.159586	2.057585
0.063578	0.609577	0.484136	2.097976	0.784482	2.201027	0.055995	1.719526
0.065366	0.349424	0.325876	2.429997	1.821821	0.83904	0.274515	4.021919
0.174941	0.356038	0.277328	1.153983	1.324584	2.990354	0.05068	2.196576
0.149048	0.947279	0.595849	0.386617	0.951114	3.124592	0.136615	6.419116
0.270001	1.672785	1.006668	2.050837	1.242091	4.053451	0.159622	1.982361
0.175372	2.001001	0.127072	1.191691	1.968681	7.264349	0.05501	4.244531
0.250733	1.613251	0.649252	1.661064	1.237845	2.854902	0.361585	5.441604
0.059303	1.394373	0.689035	1.171171	1.009352	3.028476	0.462019	2.055673
0.051	0.571921	0.638251	0.983891	1.033073	3.478042	0.163533	3.577702
0.31301	1.678159	0.118807	0.826709	2.594484	3.337453	0.190309	3.101842
0.271604	1.168705	0.30804	1.164909	1.985458	3.392448	0.013736	4.216155
0.040606	1.645115	0.209642	2.487924	2.120172	2.391322	0.164134	3.054966
0.587103	0.821073	0.10187	0.666698	0.299725	1.508733	0.110682	2.655538
0.106827	1.913593	0.245726	0.51425	0.323198	4.885723	0.053107	4.313953
0.613165	2.170875	0.71678	0.564248	1.144955	2.859476	0.260859	2.622967
0.026763	1.028256	0.371865	3.091638	1.164172	3.192121	0.028871	1.324906
0.275945	1.523614	0.505062	2.252478	1.27925	0.552893	0.227859	3.797645
0.600023	2.497435	0.845031	2.035809	3.681396	5.059407	0.200118	2.657684
0.173039	0.231407	0.689359	1.657614	1.603213	6.010196	0.130186	1.442154
0.201267	1.128601	0.143005	0.492382	0.43983	3.257049	0.246135	1.951561
0.61411	1.477764	0.34683	2.391732	0.259157	8.531063	0.218771	1.890871
0.284137	2.824785	0.179043	1.326719	0.906191	5.669181	0.125889	0.007969
0.195222	4.982881	0.60726	5.574421	1.435367	2.827309	0.222166	2.727324
0.440101	3.952636	1.296328	3.710159	0.472136	5.559858	0.143449	0.009714
0.057357	0.434907	0.250033	3.697326	2.116482	3.226887	0.286508	2.250724
0.185542	2.270984	0.185402	4.771278	1.127238	4.230043	0.070196	2.776094
0.352334	2.952724	0.855793	3.212601	1.7261	4.982509	0.113827	2.895925
0.107569	0.953089	0.308433	2.818441	0.67228	6.61929	0.149839	1.342785
0.085182	2.490936	0.225034	1.869246	1.792801	3.831961	0.257787	1.779866
0.067758	0.717092	0.632829	3.263652	2.520472	4.649945	0.115613	0.784188
0.20468	0.258762	0.282959	1.16756	1.81467	8.53667	0.387109	3.395244
0.535615	1.187054	0.280207	0.528369	4.819681	2.805391	0.278996	1.514146
0.280508	0.61656	0.280356	3.224805	2.946081	1.108768	0.167337	3.631203
0.177264	3.604569	0.715414	2.327288	4.512844	6.428583	0.053068	8.241297
0.002937	1.93136	0.30906	2.206408	0.57118	0.516822	0.417504	3.41778
0.068023	0.806915	1.183274	3.126425	3.16077	0.769283	0.09221	6.965731
0.064457	5.011755	0.358883	1.649336	4.761722	0.681577	0.273549	7.090082
0.038855	0.369988	0.460374	1.554534	1.247133	10.11472	0.072349	3.135765
0.080546	0.99935	0.770286	1.160282	0.932062	1.418763	0.16546	4.96697
0.245394	2.659224	0.20438	0.287262	1.786385	1.905334	0.285308	1.992243
0.074815	1.1927	0.398481	3.843118	0.757421	4.292349	0.378941	2.113395
0.14601	0.500653	0.375089	3.936365	0.48601	4.164866	0.245273	3.792837
0.127218	4.14432	0.399851	1.069588	3.546416	1.767778	0.199947	3.158057
0.019388	1.056021	0.370562	3.493195	1.447954	4.110862	0.037407	5.874304
0.14014	0.383394	0.500897	1.402549	1.600766	2.241146	0.265184	3.929592
0.222325	0.665912	0.455294	4.417855	0.386006	1.115327	0.377076	5.366191
0.245655	0.455126	0.153291	3.122362	0.570038	2.896301	0.14953	2.329477
0.052235	3.442944	0.329427	3.959866	1.72943	3.237741	0.299745	4.713187
0.446252	0.433615	0.418862	4.744679	3.417078	2.882132	0.234771	4.263111
0.630684	2.250489	0.367635	1.16338	0.692595	5.579123	0.011164	2.059595
0.125029	1.289557	0.768343	0.430034	1.139445	3.362986	0.150651	4.065154
0.424581	4.857266	0.431917	4.092621	1.457017	5.25059	0.198543	4.957992
0.134711	0.525358	0.387867	2.577863	2.486135	5.852535	0.07143	2.620361
0.162451	1.061665	0.705412	1.919006	1.63704	3.703312	0.503608	6.008398
0.202949	1.841116	0.195196	2.701998	0.844365	2.490866	0.068346	5.427618
0.379365	0.358176	0.378474	1.481198	1.694163		0.142122	2.737765
0.36175	0.410218	0.173469	1.834715	0.658306		0.201104	4.061748
0.097482	0.662747	0.672067	0.666803	1.445401		0.056619	1.05286
0.062836	0.278346	0.457501	2.890228	1.166559		0.089765	0.200312
0.21958	1.196534	0.528777	0.427306	0.437734		0.1321	1.660457
0.061732	0.758114	0.49457	0.644504	0.04563		0.338774	1.420607
0.415375	1.355548	0.240644	0.984547	1.56695		0.063763	5.977068
0.622478	0.922602	0.394342	1.217413	1.649058		0.003777	1.59341
0.057322	0.263811	0.353008	1.289458	3.442539		0.226028	1.561073
0.044658	1.467143	0.21412	2.789424	0.924256		0.095885	1.65628
0.430003	1.974297	0.245283	2.096056	1.164486		0.338384	1.633496
0.083015	0.438825	0.19381	2.309863	1.087079		0.282784	3.368039
0.180032	1.878463	0.307567	2.11833	0.739557		0.070928	2.121895
0.220033	1.165063	0.275054	3.79735	0.59386		0.162495	1.318621
0.1233	0.995238	0.188767	2.622568	0.962744		0.207246	0.702561
0.344405	0.397531	0.796631	1.405125	0.745816		0.464141	2.522319
0.105577	1.440385	0.303093	1.848675	0.616309		0.012737	3.207622
0.136378	2.766319	0.536756	2.605518	0.472129		0.424244	2.411038
0.080972	0.423196	0.069823	3.859557	0.449838		0.014051	0.6002
0.336327	0.416363	0.372386	0.702783	1.337813		0.181656	1.869722
0.05356	2.11761	0.193419	2.759226	2.712287		0.176925	1.485407
0.238184	0.375346	0.548621	2.052273			0.106101	3.029831
0.226234	0.987555	0.368042	2.182543			0.210702	3.077787
0.182158	1.976724	0.427674	0.961196			0.182719	3.895832
0.122397	0.145431	0.497377	0.540269			0.006754	0.077028
0.150459	3.309026	0.258526	0.715418			0.039679	1.388444
0.165381	3.56638	0.253331	2.760507			0.205073	2.828839
0.281474	0.913068	0.05176	1.8127			0.343119	1.352406
0.193432	1.742553	0.443426	2.511078			0.066028	4.7951
0.02798	0.427129	0.188276	3.962369			0.165581	3.271075
0.319474	0.433196	0.503222	5.037581			0.103789	2.289481
0.029034	3.545534	0.288141	2.233291			0.261251	1.369586
0.206261	4.387096	0.392192	4.386637			0.098179	2.37067
0.367488		0.139266	2.662009			0.064652	1.917707
0.074808		0.980808	0.527845			0.099411	0.826394
0.041447		0.340304	1.536931			0.081139	5.087244
0.02184		0.402288	3.547368			0.096796	0.854274
0.109348		0.34855	2.17955			0.058549	5.398658
0.160409		0.344555	2.730725			0.006546	3.047115
0.133046		0.25815	6.082627			0.128103	2.30602
0.060109		0.394129	1.843347			0.028813	3.711747
0.149501		0.886518	0.599101			0.268741	3.181663
0.0568		0.815982	2.826258			0.19344	2.973229
0.342075		0.547373	1.098839			0.121912	1.034743
0.138319		0.164297	1.231336			0.108134	0.791548
0.10835		0.404168	1.084245			0.198237	1.8345
		0.38028	2.020058			0.219252	2.215126
		0.207932	3.669846			0.15131	2.199698
		0.133431	2.197947			0.1861	3.055879
		0.62859	2.629895			0.207484	3.158175
		0.419012	5.132153			0.553006	4.747533
		0.63841	2.909854			0.155819	1.689799
		0.505729	0.521452			0.15197	2.328085
		0.367061	1.540466			0.070989	1.575582
		0.685973	0.414737			0.174419	2.382865
		0.920778	3.447906			0.510011	4.742088
		0.323001	1.027316			0.083054	1.749854
		0.415681	1.345536			0.03566	1.539712
		0.192366	1.060346			0.013772	2.284288
		0.350156	4.843213			0.194784	7.774813
		0.139252	2.413543			0.029874	0.552552
		0.45504	4.230642			0.009567	0.934519
		0.191945	5.603544			0.061748	0.429957
		0.168853	5.91323			0.230665	0.755566
		0.713371	2.76957			0.141457	1.296793
		0.650071	1.714588			0.329488	3.882689
		0.359441	0.627191			0.446345	1.055256
		0.367122	0.686044			0.239771	2.46555
		0.279789	1.880238				1.81557
		0.48873	0.800792				2.841647
		0.325521	1.327689				3.132402
		0.231317	2.892337
		0.383292	0.941196
		0.300474	3.237879
		0.359263	0.799209
			1.528186
			0.905178
			0.873389
			2.66934
			1.735256
			0.798327
			2.760163
			1.080263
			2.43449
			4.774747
			0.893804
			2.076178
			2.542378
			1.674383
			1.206926
			1.180664
			2.452885
			2.152579
