# Supplementary material for: Quantification of protein abundance and interaction defines a mechanism for operation of the circadian clock
Source: eLife. 2022 Mar 14;11:e73976. doi: 10.7554/eLife.73976 (PMC8983044; doi:10.7554/eLife.73976)
Supplement: Figure 2—source data 2. [file elife-73976-fig2-data2.csv]

WT	CLOCK
202.2783	67.26309
91.1631	23.06194
30.02267	16.14058
26.45764	13.19702
14.46842	10.64859
150.6196	60.56289
35.69555	15.90786
17.71002	10.05016
22.46865	12.04695
17.25085	17.35852
288.3086	104.6463
159.5218	77.04746
18.3867	14.79516
29.59864	13.66996
12.68795	7.679044
52.5603	13.83159
17.69917	7.412048
46.54811	8.494061
261.9533	138.2432
9.901099	7.348671
19.17254	12.44447
12.67426	10.5744
19.77435	14.22008
26.10159	13.05711
47.18645	20.14604
16.02831	13.10102
10.61578	8.841446
8.841617	6.10486
13.34723	16.8555
12.58545	7.840301
40.19664	8.318029
18.28373	13.46297
23.99662	13.18211
25.8385	9.815907
29.07516	9.726581
14.93737	6.706421
26.5608	13.50164
43.23434	14.41845
14.34385	9.298941
16.69009	9.837056
18.34402	9.505609
18.65856	10.77591
17.87111	10.00574
17.77958	10.76056
15.31333	10.74739
18.20127	9.245333
10.94478	10.99439
19.97687	12.13107
28.3143	21.03529
38.96383	14.42121
12.30959	9.2729
21.00194	16.04207
143.0512	76.70308
61.5252	64.44022
173.4523	15.83502
22.68736	10.36052
22.99258	9.961976
15.8532	8.333513
12.91828	9.090114
19.18645	11.73821
18.45819	7.909415
12.0806	19.737
42.64285	11.13617
33.12418	12.17457
29.46575	8.542517
20.6945	10.4996
25.86398	9.099166
18.62363	15.15092
19.75742	5.305962
7.876124	14.74205
35.85802	13.73987
31.208	17.42255
22.2841	17.07248
19.44504	9.139158
9.427953	8.571877
16.64692	10.89256
19.99154	16.07278
33.66019	13.00213
12.11918	9.218362
11.12054	8.348214
14.87082	17.4213
42.09887	7.421464
11.84639	8.819141
14.08169	12.3985
34.3757	13.50297
15.1312	9.045706
18.25663	7.519564
11.46138	12.78521
34.65589	10.44252
20.44845	14.0955
27.95894	7.798526
8.435488	9.055612
19.64001	6.884964
13.55	8.409107
9.740483	27.43874
89.37076	12.32904
20.37692	11.71758
28.54095	11.42952
22.21441	10.91739
13.26047	9.07853
26.73827	19.59243
8.764791	15.48003
45.81686	11.88489
15.1682	15.90498
34.95926	11.01014
16.47327	19.49944
676.957	10.43068
19.93834	11.84606
17.14073	6.86613
9.880636	9.828402
18.63969	6.2872
6.336405	6.009906
6.314435	7.811278
17.32059	7.457249
9.257437	8.274718
17.86726	8.033899
12.41651	10.31096
16.43829	18.53095
49.34683	22.44252
41.06722	8.108123
16.99439	9.622057
25.43864	10.06526
18.78745	11.39525
39.5248	7.505062
17.52505	8.661685
18.11894	14.13199
20.43059	10.14202
18.92377	10.21913
10.31987	9.450357
74.33828	22.39395
51.43244	31.65115
12.21511	8.52749
7.945921	8.679699
9.569043	7.9797
24.98836	11.65892
11.63286	6.953896
11.65279	6.353146
6.895009	6.576155
21.4236	16.05187
20.01651	10.04942
42.40294	21.93847
32.76084	15.40715
30.55698	24.64278
27.7829	11.13568
46.37913	12.78271
17.02416	10.65097
29.04925	10.10376
22.0954	16.45203
25.95729	14.32933
29.10679	12.01962
22.10988	12.57142
8.931451	8.015531
81.4244	36.39333
8.188159	7.594103
27.34554	12.04943
30.74647	11.57999
24.01037	20.46617
19.10969	20.73306
31.54675	11.85898
44.12791	14.66641
24.95887	6.153577
27.70333	6.733704
68.63479	23.13941
31.04013	10.08974
16.05823	9.006974
16.54082	16.09074
22.49906	10.56991
25.20014	7.021166
23.46677	9.015357
23.414	12.46808
15.75343	10.93749
29.6897	11.08621
10.10511	10.35427
10.9925	10.43935
22.79934	12.57058
26.40619	7.899941
42.31105	22.43662
61.85384	21.72207
9.354824	5.451324
14.95044	6.151919
32.52866	11.29417
27.46601	15.2319
24.23134	11.46582
13.92278	11.6769
13.29891	7.825364
15.71787	7.048612
24.42212	12.09016
44.33336	15.56959
14.44475	9.038004
10.76432	6.189073
30.41951	11.54664
28.60388	14.6027
18.92198	10.73522
38.22147	12.95498
54.40207	24.90531
32.15553	11.01502
39.50701	14.91833
18.96483	11.46194
24.65876	10.53957
23.14583	10.49248
40.32977	21.03507
66.63599	24.82467
60.51799	17.19519
9.283297	6.173695
31.46213	16.12115
17.35171	9.034882
48.615	13.57615
72.50619	12.84031
18.35219	25.38484
21.01693	12.15641
18.16485	19.45484
12.77222	9.86426
26.76305	10.00292
14.03857	18.86064
15.25845	8.528808
18.09778	9.677189
23.00691	15.37449
19.76778	11.14375
13.42514	23.88156
22.77511	22.80379
