# Supplementary material for: Quantification of protein abundance and interaction defines a mechanism for operation of the circadian clock
Source: eLife. 2022 Mar 14;11:e73976. doi: 10.7554/eLife.73976 (PMC8983044; doi:10.7554/eLife.73976)
Supplement: Figure 3—source data 1. [file elife-73976-fig3-data1.csv]

T24	T28	T32	T36	T40	T44	T48
0.443426	0.542839	0.486357	0.807151	0.741117	0.640873	1.261615
0.48336	0.899775	1.075549	0.38699	0.542031	0.314901	0.403082
0.957706	0.255582	0.184211	0.627717	0.450609	1.156665	0.917639
0.228039	1.103271	0.650966	1.018406	0.602564	0.829228	0.40417
0.057141	0.967235	0.884761	0.449041	0.168875	0.631942	0.518247
0.422799	1.138662	0.701811	0.530547	0.688072	0.524777	0.896626
0.368697	0.462791	0.156418	0.858691	0.775745	1.085012	0.797764
0.337225	0.8277	0.63721	1.239592	0.645102	0.548916	1.325652
1.256055	0.708129	0.088626	0.555218	0.893481	1.21289	0.597388
1.160879	0.523316	0.486619	1.016415	0.096791	0.866281	0.371771
0.243551	0.457161	0.406499	0.634907	0.955093	1.152265	0.736245
0.741043	0.512304	0.571468	0.691688	1.039623	0.741294	0.437854
0.61338	1.306327	0.472074	0.471176	0.784032	0.93429	0.605597
0.117955	0.072115	0.567162	1.276047	0.612436	0.774772	1.125782
0.385314	0.371897	0.819191	0.727578	0.643286	0.353387	0.229385
0.18394	0.452132	0.941346	0.763456	0.276642	1.030634	0.617935
1.303364	0.696365	0.58061	0.983082	0.876724	0.235188	0.344958
0.769961	0.368442	0.45931	0.479051	0.64606	0.787388	0.418561
0.845778	0.360683	0.405025	0.571087	1.158171	0.456017	1.1235
0.614488	0.070596	0.528366	0.650959	0.385499	0.750092	0.492518
1.503625	0.258471	0.573671	0.789034	1.059993	1.129433	0.503762
0.070328	0.531695	0.600304	0.390203	0.354908	0.533305	0.319062
1.52654	0.359995	0.434741	0.546928	0.509702	0.57027	0.905591
0.410916	0.510494	1.056873	0.768894	0.207533	0.644829	0.301856
0.465736	1.51654	0.375873	0.644934	0.775646	0.15955	0.618622
0.649552	0.601311	0.46942	0.955601	1.05723	0.841468	0.508213
0.51179	0.48752	0.737685	1.145329	0.072303	0.194404	1.325929
0.670388	0.677545	0.425184	0.424755	1.441623	0.561855	1.080372
1.108509	0.576343	0.673265	0.561049	1.130164	0.888131	0.83098
0.490818	0.654425	0.518041	0.689483	1.148112	0.781185	0.60779
1.707675	0.014787	0.406636	0.56205	1.257498	0.461442	0.922061
0.859377	0.464955	0.467644	0.366351	0.825748	0.757601	0.280895
0.2862	0.473176	0.668279	1.345277	0.538309	0.483742	0.440503
1.40136	0.474419	1.137672	1.062202	0.407585	0.350566	0.343185
1.425642	0.371672	0.531446	0.31739	0.467391	0.026763	0.922992
1.694773	0.645777	1.111997	1.300101	0.835094	0.885228	0.370597
0.420996	0.326053	0.573194	0.584325	0.391307	0.416961	0.425302
0.675252	0.500561	0.635043	0.550545	0.059252	1.153107	0.877695
0.222279	0.555113	0.659284	0.514161	0.505905	1.482636	0.659054
0.298186	0.63772	1.614634	1.447553	1.105187	0.570833	0.275592
0.723793	0.352795	0.454806	1.540721	1.281954	0.725297	0.087649
0.474246	0.565499	0.654545	0.746558	0.039859	1.237905	0.965609
0.376435	0.190437	0.441129	0.052269	0.223342	0.686787	0.275444
0.287983	0.5361	0.057505	0.604686	0.73111	1.409312	0.44178
0.285492	1.535306	0.46613	0.071618	1.07453	0.548694	0.265323
0.446752	0.417124	0.700893	0.335017	0.839495	0.390855	0.485608
0.828117	0.513213	0.839646	0.682801	0.897095	0.541628	0.568236
0.191929	0.637793	0.168277	0.873202	0.739764	0.845025	0.306519
0.196055	0.285198	0.602048	0.799218	1.695094	0.682389	0.297605
0.43911	0.576851	1.046835	0.645201	0.515928	0.551804	0.482495
0.553554	0.541716	0.027285	0.516986	0.631178	0.699351	0.539205
0.872509	0.748997	0.610606	0.784735	0.689375	0.317602	0.692457
0.633696	0.457066	0.679593	0.389157	0.30993	0.347846	0.499974
0.524942	0.501293	0.181803	0.869264	0.74681	0.596104	1.292735
0.326865	0.168148	0.175154	0.273637	0.490614	0.907918	0.530617
0.888825	0.44159	0.615602	0.702804	0.709739	0.569727	1.418892
0.506339	0.541397	0.256924	1.05374	0.393918	0.386964	0.998232
0.442063	0.752631	0.084306	0.697118	1.425974	0.59652	1.122677
0.616822	1.226408	0.604645	0.792696	0.124595	0.921176	0.760288
1.170076	0.544615	0.072621	0.975096	0.47809	1.410108	1.310282
1.385992	0.324727	1.056043	0.75142	1.405471	0.817817	0.829987
1.08852	0.034984	0.541577	1.073276	0.499634	1.191948	1.162367
1.092437	0.376576	0.029955	0.416481	1.396474	0.814602	0.463231
0.828224	0.439335	0.351653	1.674211	1.175934	1.026009	0.298214
0.709953	0.587295	1.309177	0.885608	1.288549	0.812212	0.483379
0.297179	0.572469	0.795863	0.536748	1.415145	0.453304	0.473309
0.386063	0.581953	0.676203	0.555962	0.982969	0.81321	0.862653
0.884351	0.009168	0.31571	0.76124	0.183727	0.645877	0.884779
0.546067	0.63061	0.536769	1.017382	0.703183	0.670612	0.627091
0.897752	0.364714	1.168964	0.897181	0.949684	0.85264	0.084029
0.914676	0.313477	0.073291	0.142097	0.624154	0.720854	0.193477
0.470034	0.359065	0.6773	0.50998	1.202631	0.715272	0.366447
0.420724	0.527054	0.300807	0.732859	0.955362	0.494668	0.311586
0.684478	0.680007	0.802589	0.596777	0.387618	1.036262	0.398654
0.288664	0.488759	0.936745	0.792948	0.580947	0.570641	0.137329
1.292016	0.597462	0.567446	0.504523	1.699388	1.217203	0.463059
0.497309	0.220482	0.020792	0.90298	0.85316	0.891552	0.48067
0.386396	0.506521	0.925902	0.728302	0.510797	0.547082	0.548228
0.67168	1.095122	0.495908	0.932238	1.075663	1.718354	0.437122
0.527345	0.990402	0.621323	0.673052	0.297404	0.857779	0.520235
0.462491	0.336719	0.252659	0.710028	1.090436	1.113602	0.449388
0.025424	0.523788	0.422726	0.400371	0.910612	1.06971	0.9022
0.663946	0.279511	0.522043	0.103891	0.627154	1.093597	1.279271
0.365528	0.016585	0.331659	0.587483	0.375779	0.20875	0.685032
0.831049	0.91921	0.366761	0.313628	0.28455	0.41144	0.553931
0.587531	0.541367	0.273	0.041231	0.970045	0.728718	0.98498
0.194639	0.012082	0.523869	0.309532	0.179831	1.834645	0.426149
0.73671	0.762158	0.803095	0.78567	1.264571	1.576165	0.967173
0.710139	0.699442	0.808864	1.254466	0.327868	0.581569	0.816017
0.84941	0.555554	0.147612	0.87296	0.445153	0.563046	0.519749
0.901397	0.063493	1.002875	0.733366	0.685335	1.050208	0.740711
0.89377	0.206457	0.562429	0.863424	0.039818	0.759656	0.105276
0.307742	0.274178	0.450823	1.252887	0.755547	0.254864	0.524316
1.164704	1.508746	0.618814	0.764865	0.915272	0.889451	0.371555
0.7282	0.618672	0.129083	0.323395	0.819609	1.35435	0.119547
0.663132	0.798775	0.520232	1.240285	0.244171	0.263843	0.919616
0.786792	0.349239	1.057332	0.932014	0.931696	1.704229	1.391733
0.592117	0.545406	0.229978	0.355241	0.023078	0.533146	0.353089
1.024375	0.477793	1.0916	0.495243	0.296737	0.535519	0.202033
0.100701	0.584853	0.992541	0.383511	0.317123	0.144032	1.419559
0.591719	0.454649	0.142864	0.649744	1.214226	0.762169	0.503447
1.140725	0.406654	0.515664	0.372818	0.618563	0.621731	0.839462
0.105248	0.58099	1.362033	0.957639	0.431007	1.111709	0.565718
0.941926	0.714365	0.523207	0.857203	0.456079	0.653502	0.814251
0.809396	0.862189	0.425427	0.472338	0.610951	0.393741	0.732647
0.770265	0.713861	0.361318	1.420556	0.038367	0.288713	0.271509
0.379954	0.021749	0.342615	0.970249	0.48713	0.976183	0.359378
0.578398	1.060403	0.548279	1.115085	0.789024	1.0802	0.509489
0.701178	0.024999	0.415591	0.648182	0.143424	0.425456	0.498764
1.084367	0.514682	0.377429	1.108956	0.533455	1.120254	0.351207
0.671026	0.843184	1.286689	0.233847	0.488523	0.804429	0.485812
0.891624	0.838665	0.993208	1.587931	0.55433	1.954657	0.281796
0.230595	1.06947	0.082838	0.367825	0.624392	0.661107	0.782763
0.582685	0.5929	0.773972	0.648102	0.541487	0.86532	0.464299
0.402848	0.516722	0.443174	1.036765	0.774585	0.773058	0.862135
0.325566	0.341055	0.64245	0.481262	0.208395	0.463668	0.599641
0.812848	0.897612	0.643007	0.733238	0.261459	0.444825	0.470901
0.754734	1.101473	0.377005	0.541696	0.766924	0.753185	0.864277
0.720334	0.191416	0.307553	0.59267	0.46016	0.573758	0.59405
0.7386	0.656943	0.559279	0.487528	0.067156	0.814261	0.711676
0.950275	0.876853	0.43638	0.977279	1.242775		0.727606
0.06927	1.187193	0.395391	0.977475	1.963394		0.567581
0.383415	0.908793	0.969612	0.487084	0.982162		0.866704
0.207947	0.550522	0.048299	1.029406	0.469045		1.083597
0.744375	0.273601	0.701428	0.547558	0.905155		0.625421
0.596211	0.244842	0.241427	0.9658	0.40919		0.374348
0.410899	0.621646	0.32839		0.360555		0.30244
0.460147	0.108639	0.536753		1.222292		0.63079
0.328442	0.253745	0.415399		0.988968		0.534367
1.183759	0.453515	0.745303		0.849083		0.46837
1.208802	0.856716	0.365033		0.982036		1.002997
1.340273	0.428108	0.109037		1.013373		0.360146
0.907715	0.993169	1.266267		0.013761		0.82361
1.378068	0.469193	0.313815		1.476696		0.677542
0.745428	0.652123	0.381885		1.090417
0.879665	0.522525	1.079775		0.808631
0.764076	0.612402	0.326841		1.491364
0.955572	0.768366	0.888302		0.012807
0.881662	0.830692	0.516928		0.779222
	1.370213	0.224658		0.062181
	0.202648	0.65363		0.963984
	0.371456	0.256379		0.76933
	0.738777	0.639552		0.361872
	0.070275	0.339619		0.509218
		0.656329		0.739097
		0.301426		0.233921
		0.721831		1.010523
		0.376986		0.510927
		0.303855		0.666976
		0.427991		1.452175
		1.395813		0.623126
		0.620174		0.560916
		0.447402		0.825693
		0.463692		1.265707
		0.752184		0.66489
		0.612206		0.026379
		0.620737		0.137088
		0.36675		0.492568
		0.122785		0.372236
		0.565014		0.378875
		0.670855		0.465785
		0.723458		0.018329
		0.614037		0.836239
		0.697752		0.840609
		1.299535		0.652394
		0.646853		0.408477
		1.031329		0.926138
		0.026334		0.119528
		0.909619		1.051434
		0.612508		1.057629
		0.991568		0.775813
		0.011518		0.589158
		0.700278
		0.393993
		0.465205
		0.674767
		0.38959
		0.010746
		0.793291
		0.74393
		0.444014
		0.047454
		0.768397
		0.564746
		0.544454
		1.529262
