# Supplementary material for: Quantification of protein abundance and interaction defines a mechanism for operation of the circadian clock
Source: eLife. 2022 Mar 14;11:e73976. doi: 10.7554/eLife.73976 (PMC8983044; doi:10.7554/eLife.73976)
Supplement: Figure 3—source data 2. [file elife-73976-fig3-data2.csv]

T24	T28	T32	T36	T40	T44	T48
0.595972	0.444345	0.327698	0.791131	0.278843	0.318304	0.639251
1.099898	0.471762	0.804383	0.298629	0.736359	0.367073	0.707692
0.972067	0.140956	0.572878	0.335438	0.429276	1.004349	0.429252
0.545834	0.593855	0.396908	0.609687	0.286605	0.850175	0.663859
0.354515	0.540014	0.356008	0.811189	0.365088	0.666371	0.897241
0.217533	0.787909	0.433486	0.442658	0.974204	0.59599	0.517732
0.825216	0.166757	0.544023	0.468857	0.189356	0.798962	0.459205
0.903745	0.446529	0.13952	0.142454	0.383572	0.66556	1.043767
0.127927	0.489425	0.34586	0.25668	0.585574	0.792882	0.806295
0.517228	0.711507	0.846968	0.913151	0.70448	1.255713	0.590217
0.207385	0.562809	0.305712	0.704866	0.489955	0.569966	0.43575
0.610824	0.494125	0.574266	1.356627	0.309139	1.083117	0.379842
0.396276	1.091421	0.629868	0.567287	0.331682	0.713917	0.400423
0.262992	0.440383	0.822638	0.387756	0.127355	0.562105	0.348513
0.436888	0.428436	0.390822	0.914523	0.188218	0.379168	0.63672
0.596291	0.71488	0.832775	0.84562	0.497556	0.532723	0.356317
0.472893	0.598606	0.295375	0.489856	0.513368	0.625496	0.662536
0.671681	0.630755	0.556173	0.856494	1.317437	0.505301	0.658151
0.775404	0.482843	0.675388	1.091325	0.36868	0.555657	0.358971
0.854241	0.52696	0.364787	0.366068	0.260394	0.710565	0.672942
0.844876	0.385375	0.45542	0.413489	0.627649	0.54967	0.298814
0.679492	0.52007	0.438261	0.698006	0.412769	0.255348	0.621308
0.394074	0.684389	0.321811	0.672726	0.353032	0.770059	0.462688
0.645297	0.404265	0.421212	0.717264	0.4338	0.573248	0.648927
0.462348	0.329745	0.70197	0.965807	0.66519	0.786318	0.414516
0.593724	0.738022	0.262281	0.36884	0.320156	0.648265	0.894783
0.611502	0.376023	0.648587	0.400128	0.870022	0.367898	0.628571
0.377291	0.761238	0.801563	1.170327	0.626539	0.929874	0.630499
0.794843	1.176843	0.366782	0.58093	1.228193	0.372585	0.363524
0.395624	0.723635	0.232766	0.324325	1.202701	0.382874	0.302852
0.51221	0.693096	0.520735	0.444613	0.51772	0.805943	0.505377
0.403642	0.154891	0.790664	0.72133	0.801456	0.634518	0.367769
0.352231	0.840203	0.985507	0.325189	0.458842	0.3382	0.721012
0.550172	0.813109	0.697852	0.76917	0.250196	0.364189	0.367292
0.612281	0.606524	0.734061	1.103522	0.470745	0.699041	0.640018
0.439613	0.923826	0.561897	0.298442	0.074607	0.614109	0.978256
0.342419	0.849845	0.526318	0.502235	0.480563	0.893227	0.965354
1.086768	0.43418	0.282956	0.648205	0.827713	0.563505	0.559407
0.667081	0.338413	0.861682	0.555755	0.975769	0.519458	0.604257
0.607328	0.447196	0.660371	0.727421	0.533319	0.860163	0.751904
0.292804	0.438301	0.379514	0.360114	0.216626	0.584184	0.666248
0.354701	0.312765	0.41905	0.636059	0.697773	0.607162	0.536054
0.471443	0.787121	0.903832	0.580211	0.516108	0.730453	0.686554
0.671651	0.787051	0.410325	0.741497	0.419821	0.22529	0.375638
0.681048	0.339342	0.539112	0.62657	0.627668	0.786885	0.480696
0.11862	0.63611	0.946465	0.281097	0.272274	0.539126	0.395663
0.460671	0.276939	0.67714	0.377018	0.898113	0.434784	0.240408
0.442582	0.174066	1.26993	0.32623	0.463176	0.398744	1.141435
0.603205	0.685883	0.179809	0.670953	0.935257	1.074798	1.321287
0.302374	0.570553	0.490261	0.651049	0.426566	0.42536	0.837054
0.780804	0.987608	0.578849	0.538567	0.424034	0.628923	0.185742
0.539073	0.664728	0.368333	0.396403	0.681657	0.989659	0.839779
0.606702	0.777643	0.435098	0.639838	0.177024	0.325128	0.363754
0.786181	0.252504	0.323006	0.490699	0.390317	0.49879	0.598066
1.390103	0.830415	0.452598	0.371117	0.204073	0.559936	0.792051
0.320482	0.293697	0.471557	0.669875	0.357728	0.645015	0.403189
0.761929	0.7386	0.38807	0.97969	0.447354	0.999193	0.894116
1.383206	0.486017	0.686581	0.363626	1.366948	0.587012	0.653803
0.391534	1.006405	0.67051	0.79601	0.487462	0.757577	0.395172
0.868543	1.27936	0.665721	0.494807	0.694768	0.530032	0.511972
0.705334	0.404018	0.723489	0.406875	0.729126	0.682976	0.369164
1.152627	0.451443	0.352831	0.270878	0.561876	0.713482	0.449032
0.838276	0.539359	0.313064	0.510972	0.359955	0.824182	0.322187
0.544268	0.49869	0.661133	0.63298	0.442572	1.099825	0.52229
1.274796	0.613948	0.836044	0.537529	0.773261	1.093798	0.281195
0.696493	0.374957	0.958194	0.844974	0.450591	0.307386	0.751366
1.229688	0.30338	0.612713	1.398204	0.63579	0.470967	0.53594
0.416563	0.69768	0.194374	0.594001	0.895511	0.284909	1.014554
0.517447	0.275976	0.337066	0.391434	0.692753	0.349334	0.451547
0.409713	0.760254	1.071701	0.183837	0.599449	0.962649	0.420539
0.601285	0.430641	0.844181	0.636079	0.981935	0.467105	0.490564
0.080604	0.357831	0.418425	1.375466	0.571401	0.752021	0.791674
0.688485	0.530795	0.507535	0.874401	0.486344	0.524409	0.49255
0.782703	0.586987	0.462861	0.226366	0.433043	0.325353	1.250484
0.469387	0.543722	0.509121	0.416313	0.359632	0.517003	0.452961
0.544279	1.137684	0.162039	0.552786	0.585924	0.437318	0.318829
0.675452	1.014061	0.649345	0.503361	0.439401	0.855441	0.370659
0.299867	0.222565	0.605707	0.902514	0.741019	0.54926	0.107256
0.360411	0.874954	0.576156	0.680774	0.601362	0.62286	0.539171
0.452321	0.46987	0.278049	0.432564	0.963193	0.543651	0.512796
0.597888	0.44203	0.360737	0.48124	0.81915	0.351718	0.616234
0.816529	0.692729	0.292701	0.668492	0.413682	0.414167	0.881481
0.658673	0.429767	1.10655	0.774697	0.715749	0.406137	0.868984
0.537879	0.646397	0.384882	0.437517	0.334185	0.221166	0.724226
0.340449	0.365267	0.480969	0.47286	0.503677	0.582119	0.929125
0.512086	0.772776	0.297603	0.351627	0.185655	0.436845	0.917753
0.689211	0.737866	0.975967	0.403369	0.139006	0.785368	0.836001
1.02418	0.588135	0.285887	0.433327	0.431203	0.638012	0.61252
0.537549	0.341612	0.230825	0.247059	0.944662	1.112742	0.826174
0.571642	0.299994	0.324087	0.22674	0.492226	0.762934	0.339049
0.255398	0.644643	0.491393	0.353407	0.288977	0.421359	0.581921
0.866287	0.507401	0.513994	1.165308	0.924899	0.95512	0.433876
0.633734	0.326409	0.61056	0.790546	0.192625	0.5858	0.971851
0.531525	0.404403	0.737847	0.364332	0.428427	0.446786	0.698402
0.55035	0.421763	0.874928	0.773153	0.487592	0.980812	0.503308
0.435946	0.364556	0.966065	0.503987	0.63557	1.057082	0.232088
0.476208	0.219617	0.918741	0.720015	0.6482	0.609258	0.467105
0.294933	0.547104	0.425561	0.612975	0.729844	0.701697	0.362606
0.662486	0.94559	0.334016	0.464951	0.491233	0.364248	0.386543
0.489105	0.672367	0.790952	0.66025	0.537118	0.651205	0.546657
0.642596	0.708243	0.329371	0.540187	0.336759	0.551784	0.621173
0.580528	0.40521	0.481996	1.353423	0.906643	0.459628	0.664596
0.311707	0.329721	0.448635	0.261157	1.039672	0.301793	0.258747
0.867274	1.129005	0.460634	0.321934	0.600905	0.826002	0.170224
0.715005	0.916638	0.102397	1.072517	0.45667	0.683032	0.951648
0.392675	0.505343	0.954628	0.480902	0.665257	0.674849	0.690715
0.429659	0.921355	0.334034	0.477617	0.280909	0.41906	0.836442
0.588544	0.603564	0.404775	0.336654	0.534666	0.738455	0.545857
0.755838	0.26371	0.185868	0.653719	0.299237	0.282708	0.916105
0.271272	0.074294	0.294937	0.828846	0.728041	0.281366	0.478799
0.430747	0.520327	0.193365	0.551682	0.563288	0.7757	0.594812
0.560522	0.30286	0.209724	0.442205	0.619593	0.521943	0.782803
0.85943	0.395639	0.580776	0.538268	0.339453	0.913106	0.449449
1.134979	0.364368	0.684899	0.424527	0.300071	0.277059	0.42079
0.509199	0.461002	0.886145	0.739845	0.420423	0.415225	0.621801
0.486239	0.852011	0.637515	0.498345	0.85949	0.458624	0.455197
0.208086	0.797667	1.020714	0.99812	0.618927	0.271029	0.739942
0.660595	0.854376	0.479119	0.429639	0.658657	0.781572	0.75954
0.40564	0.813776	0.351931	0.799271	0.781745	0.640324	0.486301
0.260631	0.404578	0.26794	0.507006	0.27907	0.695912	0.373436
0.288093	0.373179	0.567959	0.197301	0.543303		0.649764
0.533137	0.603652	0.533009	0.510377	0.412155		0.822311
0.730053	1.351502	0.486278	0.64542	0.439285		0.704167
0.375263	0.767268	0.811492	0.406479	0.400663		0.839363
0.548539	0.98108	0.391274	0.474642	0.436652		0.93227
0.870841	0.303157	0.301529	1.023325	0.695174		0.534467
0.198957	0.440782	0.322341	0.528161	0.729408		0.437199
0.818384	0.759027	0.305002	1.07017	0.608656		1.271403
0.479766	0.248677	0.78106	0.405073	0.357771		0.532845
1.071642	0.684399	0.340227	1.05499	0.332711		0.817799
0.310476	0.330214	1.000796	1.225663	0.415076		0.611603
0.307117	0.447227	0.48791	0.627703	0.261835
0.355582	0.49362	0.378546		0.609097
0.453536	0.513436	0.332893		0.574471
0.352739	0.241041	0.243731		0.284827
1.002319	0.857709	0.440979		1.027526
1.044385	0.686268	0.54685		0.328797
0.964981	0.479933	0.839717		0.504869
0.825673	0.834504	1.208419		0.540898
0.402297	0.676323	0.24137		0.335187
0.819903	1.089192	0.3704		0.864386
0.413353	0.58346	0.347791		0.256926
0.75839	0.857173	0.538937		0.477136
0.395753	1.350376	0.636228		0.191422
	0.180103	0.454345		0.402309
	0.252025	0.328735		1.082364
	0.296799	0.479715		1.167182
	0.438936	0.924468		1.138481
		0.386593		0.184594
		0.490945		0.181068
		0.35308		0.337522
		0.696928		0.411428
		0.869323		0.289115
		0.731842		0.254923
		0.612393		0.090818
		0.390926		0.265969
		0.477644		0.639744
		0.827232		0.603649
		1.139381		0.323048
		0.527293		1.278416
		0.694128		0.018112
		0.325561		0.771596
		0.809077		0.745498
		0.468322		0.214209
		0.508407		0.35439
		0.131218
		0.58043
		1.112197
		0.353488
		0.425165
		0.290525
		0.194756
		1.309178
		0.711198
		0.926651
		0.369765
		0.441618
		0.536197
		0.874272
		0.744538
		0.241187
		0.581318
		0.420117
		0.407571
		0.263595
		0.786731
		0.022998
		0.263051
		0.614211
		0.400475
		0.58923
		0.582808
		0.91936
		0.492272
