# Supplementary material for: Quantification of protein abundance and interaction defines a mechanism for operation of the circadian clock
Source: eLife. 2022 Mar 14;11:e73976. doi: 10.7554/eLife.73976 (PMC8983044; doi:10.7554/eLife.73976)
Supplement: Figure 3—source data 3. [file elife-73976-fig3-data3.csv]

T24	T28	T32	T36	T40	T44	T48
21.99182	12.78815	14.12115	28.59075	46.28397	28.7641	39.60433
21.80794	20.41064	23.56173	19.91491	30.51862	23.97974	15.84946
23.74332	13.32515	108.0181	40.551	54.67844	33.70451	16.64151
11.65691	25.17888	15.74635	27.56259	56.19651	29.84947	29.87525
17.98955	16.73621	18.03348	18.31909	21.98644	23.41241	16.4487
62.95162	27.0055	18.7559	15.75817	31.55413	30.97382	39.74206
14.76925	22.30111	46.08267	48.42712	69.59642	28.22111	31.69337
15.72805	25.83649	102.0558	12.46296	34.70356	39.09527	26.83602
28.20245	16.25615	14.29468	24.02648	22.98286	38.7956	21.76091
44.51616	15.68043	24.9113	18.71075	30.97559	22.90198	26.21501
84.09623	22.99081	61.06737	27.504	28.82341	17.19567	13.16644
13.36637	18.46652	17.02117	44.55613	53.55673	32.95442	22.68325
17.37139	29.74397	16.37224	22.09415	36.1595	32.49833	14.97496
52.18805	32.2928	17.56771	19.72513	45.4599	19.19896	25.59051
24.1853	24.42352	35.79067	17.58088	42.66088	24.38157	22.44816
26.04927	16.45755	15.42877	25.80635	23.88964	25.08002	25.18787
29.50557	19.76979	38.58724	20.12878	23.34934	23.00156	28.69462
40.86522	21.39335	25.45292	57.3647	15.34491	29.83058	18.38602
21.07506	17.26335	21.92879	19.84598	20.43722	25.3631	22.49521
26.56922	11.16053	68.73911	12.72437	70.30485	34.51098	13.89169
17.94604	18.9797	27.24225	14.8937	17.82223	27.45775	15.30914
27.99966	16.66345	35.14166	16.32648	53.60933	10.55984	17.43747
19.33408	25.23777	94.61886	30.67151	24.27907	22.97189	29.90597
48.31831	19.63127	18.04237	35.41797	170.1403	20.27955	12.04642
25.29674	14.56636	12.82383	26.79691	120.8896	38.41749	35.77058
27.27762	94.20834	19.1856	28.37779	27.92128	18.5622	14.2512
19.55819	18.71131	14.4447	22.80064	35.31091	29.57832	36.11605
18.90185	14.20765	18.38016	27.94244	28.74399	25.26431	27.88166
15.95182	24.33943	15.89231	26.3511	32.74715	34.46482	27.12296
48.37986	18.52544	16.06061	23.2652	49.78306	27.61133	23.02209
36.44098	21.50256	15.78942	33.8861	32.84789	29.10369	22.37314
28.0764	19.86341	27.53585	16.86144	32.13365	25.83242	32.64128
35.66436	100.8967	18.63149	29.78695	13.85436	23.35146	18.45538
23.12547	17.29209	25.72991	24.77899	18.03223	48.46846	15.95927
16.78244	14.24352	17.30881	42.70311	45.68829	22.83409	20.335
15.12507	14.77452	27.25463	24.47798	347.5887	23.66145	26.26825
41.43019	19.39847	38.60656	24.62225	59.45378	37.25355	16.28187
17.57533	16.66095	21.17979	37.37637	46.34169	19.99141	27.20351
11.22277	19.83963	36.11121	16.16107	71.61618	27.57565	14.71227
38.48632	16.46539	14.37748	22.56468	16.93981	28.60684	32.11152
21.27234	11.96882	51.54008	14.27006	41.82359	29.3271	32.49153
22.23808	14.50875	63.52265	18.50616	27.52152	37.75549	30.1741
10.82423	13.32667	33.03108	41.84704	16.52815	40.11027	26.50956
15.06622	21.72742	28.41865	20.68224	45.53419	33.5297	51.10498
16.70508	17.20889	39.67743	26.2156	27.68519	25.77295	22.51797
31.24714	26.15236	20.02806	23.17994	215.5089	32.31133	34.58877
18.86154	34.13777	15.51805	45.8502	22.15992	19.49809	16.78747
20.90579	33.18657	20.28992	26.00659	56.24125	24.5074	16.66319
19.6292	47.7942	13.10007	19.43495	42.07599	19.14756	16.88361
31.75015	31.62901	13.33436	42.70379	46.32037	29.32938	15.33845
11.05025	35.5083	16.8245	14.85349	44.72995	27.63679	15.64734
16.72096	26.38518	17.73241	19.50791	43.78999	27.17973	22.47095
26.04915	26.58385	12.28138	22.44413	22.25392	17.06301	48.03718
17.9016	25.62053	18.92585	30.55428	21.10601	22.6191	10.5451
13.2139	22.55764	40.01502	37.06375	15.62569	21.05293	13.10146
23.90992	14.65089	19.03847	22.7762	115.9363	12.65032	19.80472
14.82108	19.43065	31.38094	22.3472	31.6606	16.61648	25.6585
20.77289	23.27045	33.04508	24.94272	66.89412	28.78464	51.21176
22.62381	22.4575	12.29911	25.16236	21.79196	17.52699	28.2362
23.6777	15.34362	27.94947	28.99683	33.61942	48.16198	20.78631
16.88224	33.3332	23.74599	27.43602	17.02641	22.78901	24.77479
31.23409	17.77584	23.65484	17.38263	19.08266	38.76667	18.85236
25.86277	14.90819	28.56462	49.9893	21.2733	20.21891	27.3727
11.14367	36.35498	25.57224	33.22651	34.59203	27.28176	28.1652
31.76624	13.44627	15.19998	17.28349	31.7238	17.27658	11.20163
21.17182	22.61863	16.1472	22.91338	54.22402	19.77429	28.67071
19.08517	15.67239	18.302	29.93373	33.72028	26.33007	19.98708
13.24726	23.35137	69.44667	52.0159	39.49682	48.74574	17.6208
21.18093	19.7312	20.72565	31.28889	24.52826	38.23829	23.59664
21.07958	16.44625	31.88355	22.02122	56.88543	17.75588	33.96688
23.10792	14.86295	18.67581	23.15402	49.30776	39.33769	15.89355
13.36406	9.553272	14.44846	26.08815	45.22597	27.07567	82.60983
21.67068	13.16972	11.88667	27.42225	34.47501	19.89587	37.00062
16.86315	14.91248	11.72808	28.61782	20.67667	39.43538	14.17396
24.57046	19.18829	14.47765	45.33334	68.41981	12.38921	13.45086
22.606	26.5527	13.72864	30.5296	61.09707	27.06949	13.05315
12.80993	23.16713	26.13909	18.22212	51.11322	20.34895	27.39169
17.48787	17.47971	30.6438	15.63235	22.80341	26.31417	42.45544
54.38261	10.09245	17.51627	31.51401	60.30664	31.88143	23.53272
17.82419	31.70506	20.48084	31.85638	21.32261	21.40798	24.96122
25.73888	12.70059	20.53132	36.69176	18.94903	20.59433	26.87898
22.20564	28.36289	26.41024	43.68205	36.87654	48.63947	19.06604
17.63785	27.13353	17.57403	36.76742	26.79512	26.24779	37.34499
19.46782	22.83581	16.61807	26.13851	23.44493	32.00607	23.79683
22.0582	20.90036	28.16144	28.42432	27.36498	41.47142	20.06978
13.91357	25.00795	22.36038	22.86334	21.05639	27.15166	23.56448
31.79765	15.11907	14.12588	33.88312	12.35627	39.83113	19.41159
21.19305	19.3615	21.93245	40.35983	27.55148	29.55059	23.56456
16.82267	17.69452	32.51768	14.87081	21.38955	23.99795	33.4031
18.39519	16.35873	16.80882	18.37906	282.7435	32.6936	11.6808
20.58292	16.47554	62.45214	87.22129	30.45016	19.1707	16.36763
19.69364	14.31523	70.99776	30.91255	48.87375	32.31406	79.93095
27.76902	34.50259	10.86984	21.78823	113.3833	16.98223	16.80833
20.23245	19.0001	16.63135	25.05704	100.6537	20.61188	19.20506
31.10926	21.60359	23.09292	20.43366	61.3775	34.74856	18.2101
9.983186	16.45929	25.4998	30.69231	25.60994	18.84554	20.66963
22.56692	19.81286	29.35724	18.86045	36.88223	20.51885	38.78619
28.52261	17.7368	17.49637	21.35324	33.27504	32.4653	24.8563
28.22582	80.89427	18.11112	20.25172	22.05651	32.32326	28.04105
25.54098	10.56741	28.63104	18.75854	26.54807	19.58292	18.8152
26.95376	15.32476	22.85236	39.24811	110.7156	55.8943	19.59338
23.09561	20.84712	30.99056	31.80472	21.67314	45.95407	14.74276
21.41478	14.9885	48.94439	16.22631	23.53495	23.53793	16.41816
27.81761	18.677	15.6738	29.6569	25.2282	47.017	14.7467
11.83099	18.51754	17.01099	67.87622	14.04613	25.2395	30.05514
21.08939	14.91181	16.00372	42.46639	18.2652	24.10093	24.17814
23.16725	29.98806	19.46328	34.54218	16.82323	30.81852	25.26795
23.16367	15.22208	18.68286	25.69486	26.52055	19.48378	15.5488
16.33577	11.10189	83.9097	23.50461	40.83708	23.25833	25.78422
60.76673	18.17609	19.07153	21.65503	20.04895	28.13768	14.00966
20.46904	47.49554	70.7612	24.47248	16.7197	18.51912	13.53037
18.83514	24.59377	68.67461	29.58074	38.69084	17.99874	21.60588
41.5508	32.97233	19.43274	27.97427	29.76994	48.49055	16.36215
18.98968	16.72829	17.64695	25.29878	11.4539	26.94793	23.66216
28.1591	16.41144	17.96446	33.55427	30.04676	22.53586	17.92297
50.72698	18.04881	18.91285	24.62354	25.71808	30.46735	18.16076
14.14141	14.78739	20.91172	35.82374	34.66661	19.31693	31.32142
27.49598	21.23745	14.7942	35.75638	31.36683	12.87088	22.02529
37.07892	17.96809	33.44722	36.64266	42.03983	24.93863	27.89731
19.24988	32.02468	15.62002	14.10516	31.01121	35.5473	27.37971
19.74352	14.87278	63.79026	25.65357	16.77142	22.9067	42.06554
21.88937	24.87149	54.58016	32.68249	22.57028		12.64826
31.51244	24.51979	17.4898	25.04525	52.64012		16.08486
22.13913	22.92962	21.49952	16.12015	28.34988		26.54737
29.03824	19.73273	14.63888	25.53619	33.58654		29.72314
20.02464	21.63861	26.48146	26.25424	34.37451		24.56392
23.50011	19.44144	15.81934	23.03389	40.84005		23.89231
25.25	48.81933	104.1403	18.54917	30.1734		19.08142
20.83054	15.26329	24.56889	20.95375	26.32121		16.57029
18.71433	10.63821	18.86484	14.70575	20.32652		15.6006
28.66293	89.32242	20.77716	24.09044	36.85501		40.72058
25.51277	15.46298	19.23563	28.76453	53.40761		29.63475
26.06634	17.89303	17.71835	26.17892	286.2222		33.98452
29.71909	15.68178	13.98179		38.74104		12.28938
20.26413	15.42813	32.22379		36.99232
27.21064	17.57192	18.49436		32.15649
20.88514	17.19624	25.89332		34.17528
18.78423	22.35099	14.01009		33.03825
21.7538	18.36277	17.47333		27.86635
20.45505	14.72092	19.28873		51.92612
20.03332	15.70319	16.41322		28.50977
34.73293	29.32676	82.31352		16.09862
45.16071	24.26666	40.48928		91.76507
14.39475	31.1078	17.62118		36.16637
	11.70814	28.60376		41.71077
	20.16746	59.76416		50.45977
	35.97609	18.60321		28.60913
	20.2121	15.17915		31.16739
	26.24571	20.72285		23.81967
	17.38051	21.73328		20.88841
		25.49585		18.98036
		27.12481		23.41088
		19.27025		45.37233
		15.106		27.54873
		21.45041		112.7503
		15.97646		14.23163
		15.81232		24.46117
		19.9622		23.68643
		10.63434		109.1623
		21.48066		116.8969
		16.0324		25.26862
		16.88089		28.67719
		19.63119		24.88562
		17.54703		98.11683
		20.60429		353.7621
		15.30458		61.93593
		31.85238		29.96303
		22.19538		28.08501
		14.08395		26.0231
		15.83846		31.51589
		21.35677		42.63191
		30.05646		22.16134
		22.16038		42.83233
		98.49607		33.47222
		31.9315		111.1524
		18.08096
		22.72609
		26.00165
		18.16957
		26.06844
		22.14319
		73.45453
		24.62715
		21.37759
		22.75494
		124.4477
		59.83502
		21.39511
		30.41788
		23.43907
		27.42046
		26.38353
		17.19464
		41.2354
		14.77795
		24.4886
		37.26642
