# Supplementary material for: Quantification of protein abundance and interaction defines a mechanism for operation of the circadian clock
Source: eLife. 2022 Mar 14;11:e73976. doi: 10.7554/eLife.73976 (PMC8983044; doi:10.7554/eLife.73976)
Supplement: Figure 3—source data 4. [file elife-73976-fig3-data4.csv]

T24	T28	T32	T36	T40	T44	T48
9.595723	5.121616	3.477751	6.098352	6.663112	4.094955	8.754247
4.901106	3.116658	15.4026	6.955198	6.172258	4.975971	4.849762
3.694303	8.02356	7.412236	8.520333	9.479826	3.610916	8.546886
8.660632	4.96323	5.358062	5.570025	8.68543	3.969532	8.80987
17.79552	2.201132	7.382969	4.295613	11.86983	7.424631	5.250986
8.689028	3.571103	10.87532	4.748033	4.42448	5.073081	7.190607
7.247621	3.783479	5.995085	7.905051	4.959338	3.449292	3.587747
6.765074	2.716216	8.99583	4.576287	3.722214	8.27925	5.006153
7.316525	2.520463	5.911841	4.712007	5.741011	3.548278	6.318164
14.17016	2.777815	8.047024	5.082016	8.654392	4.019583	4.518641
18.24254	6.430194	14.13998	5.719538	2.740567	1.960235	5.453592
9.221675	4.004604	4.159923	6.905536	3.951928	2.858221	4.935138
3.721691	4.084448	4.707684	2.902075	11.30062	18.05293	6.227758
5.573183	2.442392	5.367179	9.190894	6.36767	5.181577	4.264862
7.642731	8.721335	8.614498	3.651927	4.968644	6.60514	3.348942
4.378283	4.967172	3.871563	5.32821	6.562008	3.520043	8.735186
3.352742	13.36546	9.853609	8.085562	2.939495	14.1104	5.922691
2.882856	3.679924	13.01498	2.362622	2.847035	5.17357	14.77526
8.321008	5.119343	3.667702	3.921924	3.93229	5.72402	6.436955
4.405719	7.409107	12.52354	4.285787	14.59367	3.914118	5.167425
4.30616	5.195579	18.1331	5.961956	2.583859	3.532765	4.905807
3.712236	7.083663	5.67063	3.447782	11.01091	11.77786	5.458367
4.219586	6.240171	9.739498	7.102137	6.960597	3.980556	4.91498
4.066574	4.373996	3.766508	6.659314	21.23422	7.874248	9.797295
6.121929	7.116601	18.33702	6.883941	16.63132	6.804019	5.330698
6.66096	8.459134	3.141864	4.819664	7.134747	5.036987	3.58502
8.697347	3.026662	2.985668	2.863254	6.115204	7.694427	5.884506
1.850364	5.872515	7.293763	5.775471	3.987678	3.988854	6.130098
7.232557	9.631558	9.090763	7.536122	3.059868	3.528541	2.591144
7.380511	3.193602	4.047726	6.544888	5.886051	6.591899	5.552499
2.481515	5.094687	5.563231	3.419829	2.748503	6.47958	4.170118
4.817355	2.610694	5.490231	6.603614	7.814102	4.338105	2.355841
5.881846	13.51151	4.577589	8.612092	3.19011	4.94099	10.22536
5.095045	8.560811	3.766107	5.576543	7.296245	15.55822	3.890563
6.206807	5.153847	3.092379	4.787138	12.90794	15.87698	7.701563
3.002804	5.575392	4.225716	10.49971	5.169163	3.855762	6.444883
2.854976	7.737897	4.839983	3.339959	6.026794	4.537772	7.797781
2.915775	3.293861	3.343191	6.952352	4.1967	3.332417	5.641143
4.433714	5.104081	6.656671	6.431968	4.683725	4.24011	4.440842
7.463759	3.827222	3.31783	6.238886	3.923218	3.717904	2.871125
5.792542	5.967273	7.393706	6.914551	4.154512	12.00735	5.011821
4.828621	2.422125	9.701515	24.60946	5.103992	6.497129	7.83024
3.128979	2.994674	6.923172	3.54755	4.915791	6.979928	7.668839
3.653112	6.244469	7.955722	10.85045	6.4859	7.515202	14.53318
5.833277	13.89753	5.60321	6.627848	5.931648	7.821934	9.308356
8.779817	3.661704	8.966025	5.399372	9.127209	7.881765	7.278031
6.250455	2.90906	4.958004	7.384896	3.360146	6.014488	7.350379
4.344413	3.661536	8.179566	3.768042	4.269415	3.827184	3.754742
6.560159	6.311119	9.642925	7.423193	6.949041	9.43529	16.63525
6.645042	4.047474	3.946366	3.572839	3.685407	5.237119	12.97718
8.534075	6.537281	4.925563	7.49147	3.452428	3.427844	3.994652
6.337832	2.699504	3.163446	11.80368	4.215637	7.926631	5.908466
4.859556	3.81015	4.793039	6.224426	3.709407	6.813822	6.233571
4.936487	4.796846	7.541599	8.799526	5.288743	5.569029	22.70378
4.1689	6.561625	4.675283	4.408512	6.229287	3.670664	4.309925
7.827027	5.160704	7.616538	4.50696	4.971215	3.218642	8.565971
5.048095	3.118068	17.23836	4.80468	7.211228	4.042034	1.952066
6.108742	7.938823	7.078836	5.439753	3.929193	2.863085	3.516685
4.266089	6.97421	10.15469	6.966989	2.911066	3.065887	3.211236
3.879125	2.73067	9.582082	5.951241	3.115228	6.365246	3.919355
4.283739	3.745412	4.453401	2.569953	4.121631	5.001785	4.199379
4.679731	4.198688	9.521775	4.352085	2.385635	2.992555	2.693847
4.708752	9.378284	21.80067	6.979514	6.619443	2.312957	5.096626
1.920176	7.541011	8.582936	2.81879	7.424889	3.235482	3.215428
2.925749	5.606201	10.07958	7.613989	7.144046	5.357126	6.280307
4.817904	5.574417	4.814472	9.468454	4.903643	8.815025	3.974814
3.817109	7.845961	5.21066	15.19987	3.835268	6.38853	6.636654
4.937949	3.790289	7.001754	5.060871	2.709452	7.346906	3.739802
2.73184	4.120359	5.121098	7.499101	3.804318	6.461771	4.866708
4.985646	9.381008	2.786972	3.893432	7.462553	4.530384	6.152018
5.897928	6.50808	4.996226	3.483811	13.05078	4.717727	8.870995
1.96933	8.694683	5.623486	7.468944	9.061524	5.15218	6.813522
4.53118	8.637084	3.857847	6.649777	4.38208	6.690738	18.06915
4.318931	4.889139	8.336884	14.60827	2.472595	3.432738	11.67193
6.293959	8.574865	2.378079	5.940181	8.399975	6.76997	7.721758
10.14512	6.12104	5.538426	4.658924	6.634142	6.150952	6.385414
4.976086	7.134725	3.020438	4.746408	7.165128	2.654709	11.03282
8.692181	6.531965	4.788095	2.938521	3.597947	4.954733	6.928977
5.926074	4.833772	3.865987	5.229646	4.506794	3.295902	5.891572
10.60709	3.613591	4.302774	5.237179	4.920655	2.49437	5.347833
5.84732	3.617402	3.193539	7.557504	6.865351	4.615462	4.433897
4.036952	3.846289	7.60623	4.766014	5.384887	14.94267	4.696198
7.690206	3.02486	4.622638	4.905477	3.762218	4.911974	2.469925
10.85261	3.306743	5.736848	2.876934	5.182694	2.808676	5.231003
8.474018	6.112976	8.803909	5.715881	4.777293	11.39655	4.461821
4.026707	9.477684	9.769695	5.812356	6.92359	9.328837	7.99123
4.811354	15.02716	4.681732	5.388064	9.780015	3.933864	13.4749
5.73629	2.664391	6.980843	6.448465	5.830319	7.440039	4.157959
6.285324	3.199528	9.920356	7.113827	25.06026	2.219383	2.107286
4.699461	13.16867	4.782495	34.64931	11.68827	4.683654	8.491637
4.387598	2.806622	83.83011	12.81091	7.215788	8.349932	6.028028
3.241167	3.018641	14.90945	8.043766	5.990701	3.47658	3.403598
2.459698	4.550057	5.717955	3.606732	6.829531	4.742161	13.57648
2.757238	5.961264	3.050075	2.753506	4.646898	7.218292	8.464852
5.514358	6.212104	3.133302	2.930256	7.096227	7.44236	16.40853
4.340844	6.860225	5.926557	4.108016	4.439787	6.946796	5.837224
7.381925	6.628436	5.267964	5.397434	3.550517	10.71463	6.264885
5.105406	3.074421	4.614446	3.993371	5.922192	4.468506	2.885439
3.583876	7.843367	5.315255	5.164088	6.938958	11.45824	7.323894
5.602371	5.134336	5.307314	2.750237	7.284467	5.419859	4.43632
6.29983	4.349338	6.826702	2.463071	28.73313	14.04101	8.320615
3.494546	4.843188	4.16645	2.482623	6.337578	3.758773	4.260743
6.829289	4.75799	12.48783	4.629069	3.784295	6.149917	3.738109
5.486278	4.205091	2.54747	5.09297	8.360939	5.867106	3.375981
5.693551	5.265248	4.919546	3.238751	9.417312	3.483017	3.336826
9.719215	5.933106	3.16699	7.002889	5.629281	9.001541	3.661685
2.62279	4.327544	9.293975	3.322766	6.038047	7.043943	5.4187
4.305451	10.43467	3.364952	2.034517	7.763498	2.801534	3.57866
5.218066	5.836991	7.17421	4.570015	4.38083	5.295516	6.222182
12.45556	6.71336	5.536859	6.929223	4.171994	6.481318	7.5355
3.78534	7.652622	20.31671	3.001397	4.083029	9.293424	6.231493
4.11508	3.792897	12.66341	5.797489	7.770797	6.80299	4.717194
3.300445	7.122959	2.967797	6.176523	7.718777	4.01039	7.026931
7.609787	3.020916	3.016845	5.364708	5.394191	10.81581	3.922203
4.885415	3.539448	5.7354	3.990438	6.92981	8.492667	5.155501
3.594752	3.299124	3.530756	10.75661	2.980461	2.266529	3.080706
3.906942	2.335958	7.957953	3.504465	5.113804	10.97453	9.774031
17.33132	12.15318	6.233265	23.13676	10.44155	6.572265	4.794247
14.08186	2.476653	18.73198	3.286449	6.795478	6.020455	9.989501
6.026204	3.847811	4.104995	3.140109	10.55929	7.137143	10.1779
6.002834	6.41514	5.292523	10.92206	4.136591	2.953563	3.497315
5.324845	5.317886	5.141087	7.784246	10.70551		9.86853
3.861409	3.068384	4.016188	4.01786	11.95441		4.953839
14.99194	4.124988	7.446983	3.357607	3.760446		2.575979
8.072474	2.509599	6.245945	13.23658	8.33251		7.576468
3.079525	4.235234	4.475921	2.768566	5.154792		6.611327
10.16903	10.81352	4.760112	2.821972	7.297271		11.25682
4.857188	4.468127	7.709136	4.90252	3.183903		5.348608
4.068568	7.563437	4.059018	7.335121	10.57132		4.35678
4.89397	9.904658	6.607746	7.327347	7.782407		9.524121
9.864191	6.109856	7.78504	4.12012	9.094813		18.75475
4.588653	6.177373	3.462059	6.701221	7.792566		3.366225
5.249277	8.768538	7.422159		12.48349		9.093562
4.644544	8.403405	2.624004		5.796704		5.483217
12.35274	9.302352	8.006555		6.519426		5.9082
6.152507	5.093057	4.344221		3.98408
2.410095	8.224186	4.37863		2.636685
2.58885	2.030234	7.202843		2.876208
3.432225	5.44544	3.216709		5.129338
2.268743	5.736582	7.630378		10.09433
3.512449	3.851902	6.601462		6.308412
6.572118	5.121732	18.44563		2.860019
2.788464	2.034931	3.620325		12.59327
6.003674	3.236415	13.60642		8.086216
	5.632758	2.345628		7.124284
	5.968118	16.04022		25.22629
	13.27136	2.215488		4.783653
	9.425021	2.881791		3.496297
	9.892598	8.174104		9.2716
	5.232572	6.911416		2.960852
		13.22937		5.262112
		4.467024		6.665601
		6.959708		4.262731
		3.593368		5.843016
		8.38726		14.67815
		6.009112		6.095841
		6.820021		7.213371
		6.110283		8.74261
		3.885573		6.573893
		3.351209		4.641794
		6.64605		3.554683
		2.948887		6.211306
		4.81992		6.277675
		4.049223		9.095927
		5.325649		4.310106
		7.447547		7.643564
		7.477804		6.078423
		22.66971		3.595565
		5.023262		5.373744
		6.128099		5.444879
		7.187483		7.793943
		7.163395		3.678454
		9.553243		4.960448
		16.91824		4.97398
		9.220122		14.80648
		7.068106
		4.855988
		9.829723
		11.62714
		3.581792
		4.619775
		9.58626
		5.458667
		4.891363
		3.728929
		7.631326
		7.567723
		8.989755
		14.63773
		4.871223
		5.317832
		6.083737
		8.75673
		4.567617
		3.354466
		4.086059
		5.598547
