# Supplementary material for: Quantification of protein abundance and interaction defines a mechanism for operation of the circadian clock
Source: eLife. 2022 Mar 14;11:e73976. doi: 10.7554/eLife.73976 (PMC8983044; doi:10.7554/eLife.73976)
Supplement: Figure 4—source data 1. [file elife-73976-fig4-data1.csv]

LV2 PER2	LV2 CRY1	LV1 PER2	LV1 CRY1
0.16709	0.141578	0.108505	1.356272
0.198087	0.240016	0.18715	1.661385
0.145052	0.312669	0.149888	1.181511
0.210472	0.41285	0.178628	0.989835
0.165317	0.16809	0.099519	0.922632
0.101603	0.226053	0.214415	1.580707
0.25024	0.295434	0.136124	0.265571
0.462897	0.269675	0.183921	0.803791
0.209664	0.268154	0.42008	1.100714
0.116764	0.327662	0.209896	0.258693
0.329369	0.196623	0.41438	1.027349
0.178121	0.313191	0.112023	1.645166
0.305414	0.154701	0.118813	0.494853
0.280998	0.31079	0.115296	1.193747
0.536312	0.176076	0.228264	1.196512
0.315064	0.203325	0.05676	0.621276
0.174064	0.197259	0.173257	0.741893
0.147455	0.28796	0.071866	1.001848
0.092414	0.166355	0.22683	1.262545
0.238551	0.685926	0.054733	1.560047
0.247027	0.347812	0.0428	1.355584
0.275195	0.352721	0.14878	1.083687
0.115289	0.195883	0.16846	1.504385
0.178013	0.388708	0.052358	0.995054
0.169641	0.21901	0.069113	0.650539
0.12397	0.458598	0.186643	0.226811
0.082506	0.365603	0.227926	1.403415
0.322556	0.441222	0.083381	1.845888
0.170671	0.313587	0.221971	0.379476
0.293155	0.182142	0.202728	0.251227
0.297463	0.272055	0.082297	1.388952
0.256592	0.167202	0.135414	0.175069
0.307015	0.341018	0.205475	0.94999
0.158537	0.165494	0.130273	1.025263
0.047258	0.388637	0.45203	1.293041
0.247133	0.084605	0.16304	0.488795
0.112683	0.278083	0.086273	0.535793
0.306016	0.225657	0.10357	0.484455
0.10531	0.620683	0.2321	0.74704
0.478785	0.43373	0.320736	0.728641
0.156687	0.697981	0.088891	1.603389
0.207846	0.565593	0.120965	0.704208
0.070852	0.217536	0.112389	1.60127
0.283889	0.348443	0.110426	0.631519
0.111501	0.188589	0.267698	0.710773
0.167214	0.359837	0.209992	0.394649
0.162605	0.122629	0.098633	1.529466
0.200801	0.015284	0.099343	0.405442
0.160422	0.224481	0.132823	1.512037
0.138344	0.263633	0.357824	0.424392
0.155304	0.249286	0.082572	1.107137
0.187103	0.053389	0.423681	1.053729
0.145114	0.050824	0.174996	1.061858
0.072074	0.174671	0.130245	0.632988
0.147157	0.121952	0.092426	0.293864
0.106704	0.195626	0.048101	0.816516
0.110717	0.113893	0.136794	1.324017
0.16875	0.466038	0.20842	2.413705
0.024016	0.220976	0.23587	0.471404
0.337511	0.375162	0.165117	1.127671
0.428496	0.12086	0.465464	0.825815
0.102451	0.070677	0.398714	1.170827
0.218616	0.058171	0.239197	1.678303
0.022122	0.04709	0.297267	0.646154
0.17865	0.078563	0.242703	0.710765
0.082235	0.175115	0.049382	0.424577
0.207615	0.050931	0.236153	2.100998
0.249565	0.217187	0.245829	0.616463
0.07391	0.09455	0.163661	0.786861
0.082335	0.037619	0.282487	0.186947
0.116195	0.083792	0.198666	0.845393
0.225138	0.126884	0.160559	1.65266
0.301061	0.392009	0.145825	1.707566
0.207148	0.067611	0.155734	1.398838
0.151048	0.444539	0.214263	0.361454
0.087151	0.119831	0.295902	0.996619
0.086613	0.052714	0.338511	0.404509
0.248603	0.39892	0.201816	0.10904
0.57146	0.053813	0.28969	1.335428
0.320229	0.103769	0.124286	0.741581
0.241683	0.029222	0.215027	0.438894
0.14022	0.069208	0.460213	0.286404
0.378289	0.179119	0.079379	0.531606
0.085141	0.049798	0.324366	0.097427
0.205774	0.043656	0.334421	1.061701
0.155245	0.144988	0.227157	1.253227
0.220587	0.404147	0.349754	2.329112
0.102838	0.35394	0.233503	1.634692
0.194471	0.066965	0.290283	2.024204
0.262749	0.359441	0.186876	2.80902
0.093746	0.11559	0.122416	1.088566
0.134187	0.167406	0.113378	0.690009
0.089499	0.448251	0.205902	1.375566
0.086492	0.07518	0.210002	2.66752
0.333837	0.225378	0.345796	3.441143
0.198802	0.29704	0.26216	1.207272
0.474507	0.629321	0.191082	3.027429
0.22329	0.383375	0.452312	2.365994
0.077999	0.253241	0.186319	0.699003
0.288576	0.199601	0.140391	3.331423
0.303246	0.235288	0.403502	3.328547
0.316619	0.171556	0.237375	2.48057
0.201907	0.129439	0.287278	1.300076
0.129448	0.397291	0.194298	1.065361
0.192637	0.042423	0.240887	2.308241
0.133271	0.014315	0.248774	3.244413
0.264	0.164804	0.242208	2.312284
0.180397	0.627678	0.173784	1.355962
0.147042	0.24082	0.107313	0.194435
0.028209	0.396862	0.256598	0.800852
0.08624	0.200031	0.085186	1.758531
0.039783	0.342614	0.194599	2.049614
0.320428	0.218212	0.077791	0.601393
0.027918	0.454624	0.118733	0.215433
0.359181	0.299504	0.305558	0.498846
0.11073	0.443677	0.129222	0.426065
0.524726	0.200514	0.379032	1.051808
0.217153	0.072379	0.114734	2.799234
0.138955	0.323014	0.135022	0.434053
0.141035	0.072421	0.167364	0.681571
0.157976	0.245122	0.130109	0.788779
0.165233	0.177349	0.208845	1.929188
0.097091	0.363167	0.05425	1.312536
0.17253	0.115411	0.225519	1.455037
0.077922	0.263035	0.067828	0.31445
0.099376	0.163456	0.415179	0.452375
0.056384	0.010499	0.134917	1.411205
0.224587	0.062934	0.058799	0.659247
0.062724	0.058442	0.105934	0.777902
0.150423	0.281739	0.091014	0.204081
0.142142	0.135009	0.247725	2.279822
0.128954	0.195641	0.32648	2.303085
0.200459	0.057374	0.146145	2.161312
0.095034	0.374403	0.277183	0.299703
0.085707	0.221549	0.189633	0.369129
0.083987	0.079681	0.392545	0.365126
0.095319	0.159845	0.121495	0.314599
0.224564	0.08812	0.252947	1.344866
0.115725	0.368087	0.098362	2.292311
0.211019	0.058049	0.089035	0.008841
0.168086	0.090602	0.129952	1.041921
0.138272	0.054628	0.135349	0.944033
0.131275	0.448369	0.236296	0.65872
0.305266	0.235954	0.131495	1.366104
0.221947	0.154193	0.160744	1.515837
0.194923	0.415051	0.170366	2.59536
0.354144	0.18212	0.375702	0.805304
0.154559	0.497449	0.203636	0.579761
0.106183	0.089848	0.16599	0.788979
0.131141	0.314138	0.353508	1.642885
0.190597	0.099349	0.174801	1.998416
0.205266	0.081969	0.20684	2.023566
0.523108	0.075567	0.204039	1.149079
0.12346	0.075836		0.309749
0.250577	0.325336		0.314993
0.11786	0.080361		0.180304
0.160811	0.449329		1.444019
0.26118	0.339264		1.16821
0.086089	0.16994		0.689694
0.077936	0.151242
0.165258	0.27814
0.216704	0.152409
0.210454	0.20065
0.173142	0.141421
0.219886	0.345149
0.267976	0.390921
0.430555	0.199354
0.094081	0.151281
0.217487	0.355894
0.117736	0.205332
0.09616	0.662717
0.293385	0.248497
0.159892	0.218862
0.161272	0.050503
0.208228	0.436509
0.158496	0.242956
0.186199	0.274086
0.119833	0.35089
0.029832	0.080036
0.174415	0.20262
0.015648	0.412406
0.242625	0.246594
0.231385	0.348712
0.321855	0.238595
0.246918	0.090169
0.421239	0.171207
0.014523	0.121981
0.113715	0.26044
0.373035	0.340164
0.229662	0.193177
0.407509	0.265588
0.136365	0.503165
0.174271	0.358479
0.020779	0.165589
0.045429	0.152063
0.134865	0.173422
0.168685	0.136194
0.227392	0.135153
0.062605	0.067368
0.09465	0.101806
	0.04164
	0.441278
	0.089425
	0.04973
	0.125294
	0.314253
	0.096869
	0.726777
	0.269909
	0.170969
	0.28431
	0.637161
	0.093591
	0.0721
	0.109723
	0.256934
	0.242277
	0.275681
	0.080938
	0.259374
