# Supplementary material for: Quantification of protein abundance and interaction defines a mechanism for operation of the circadian clock
Source: eLife. 2022 Mar 14;11:e73976. doi: 10.7554/eLife.73976 (PMC8983044; doi:10.7554/eLife.73976)
Supplement: Figure 6—source data 1. [file elife-73976-fig6-data1.xlsx]

## Sheet: Sheet1
Residence Time BMAL1	BMAL1	CRY1	PER2	CLOCK:BMAL1
3.63372	7.17915	15.3765	6.49244	0.185
2.27118	11.3738	10.6346	5.54585	0.447
2.63852	8.21409	7.46521	3.22304	0.24
2.49938	7.95296	11.6697	4.28713	0.226
2.94291	7.13696	13.1226	5.72367	0.183
1.72265	8.09616	7.27914	6.22305	0.234
3.71747	11.4183	14.2254	1.55485	0.45
3.663	10.0301	11.4279	7.16596	0.352
4.60829	9.68019	11.8597	11.5425	0.329
3.04599	9.15303	20.2451	13.171	0.296
6.20732	13.9849	5.46327	5.00325	0.66
5.21648	9.70337	8.96825	3.57848	0.33
6.41437	6.08984	10.8692	13.4606	0.135
8.47458	4.67355	25.9449	7.01593	0.0805
5.07357	6.96261	7.88486	5.00882	0.175
8.13008	11.012	8.57171	3.76874	0.42
6.88705	5.56703	6.87483	7.50156	0.113
4.66636	8.45314	15.8512	4.73522	0.254
8.43882	8.92955	10.1763	7.16327	0.282
5.77701	7.24249	12.18	4.4399	0.188
7.75194	6.7096	8.40897	10.5263	0.163
5.22193	15.8143	16.0187	2.74847	0.831
5.29101	8.41764	22.606	11.7662	0.252
7.38552	9.89505	17.6514	9.57203	0.343
4.73934	9.42633	9.80833	7.61548	0.313
7.3046	8.5303	3.99973	3.93546	0.258
7.71605	8.58299	6.09434	9.77399	0.261
6.77966	6.97004	10.0357	8.75983	0.175
9.87167	5.91283	7.95104	5.23837	0.127
5.74713	8.9339	10.2858	14.3054	0.282
10.3627	6.11692	5.69042	11.1679	0.136
6.65779	11.8614	10.3851	7.30749	0.484
9.87167	8.02443	12.2854	5.38967	0.23
8.80282	9.5827	4.10211	5.25273	0.323
6.72495	6.17686	8.38763	8.31825	0.139
2.40154	7.68535	10.0221	5.36394	0.211
1.27681	14.5081	11.9487	8.68895	0.707
2.98954	17.0591	13.0923	3.8936	0.957
3.67512	9.38462	9.78898	5.96196	0.31
2.91715	6.91606	9.13937	14.5956	0.172
2.43013	11.7491	6.75135	11.9769	0.475
2.09732	11.2296	5.12355	3.48431	0.436
0.811425	8.67565	5.74333	4.23561	0.267
2.13356	12.5846	11.4864	20.5313	0.541
1.48082	11.3067	9.04198	8.05103	0.442
1.60051	6.71624	12.2519	3.33813	0.163
1.58579	11.9874	10.613	3.85269	0.494
3.05998	8.23838	12.9288	10.973	0.242
4.31965	15.6905	6.25484	2.96358	0.819
2.03915	7.00085	5.94692	3.06366	0.177
2.07771	11.221	6.07356	2.89066	0.436
1.30497	7.30539	9.23543	16.0468	0.192
2.47586	7.53777	7.48787	2.81475	0.204
1.23274	6.17959	8.13816	5.67801	0.139
3.94633	9.29841	36.1011	2.93662	0.305
4.63607	10.4682	29.3325	3.27904	0.382
0.86408	11.9342	12.5526	5.07966	0.49
1.33103	8.63601	12.5039	4.44174	0.264
1.6284	11.3761	11.0916	9.51364	0.447
2.41955	10.1054	8.04331	5.32892	0.357
11.7925	8.88989	31.2282	4.76867	0.28
0.492271	8.11476	16.815	9.01951	0.235
2.08247	2.73764	6.41465	6.00251	0.0282
2.14408	7.8174	19.9879	2.89291	0.218
1.02459	9.16052	10.209	9.8765	0.296
0.483068	31.7771	7.69523	4.03942	2.96
0.945984	7.38526	18.0401	7.62248	0.196
3.45543	5.54005	37.0681	4.3203	0.112
3.64166	4.40889	18.0993	6.48566	0.0718
6.72495	7.11218	15.0968	3.10952	0.182
1.61838	5.65584	14.0916	5.71498	0.117
1.52416	22.3725	15.2403	4.47546	1.57
1.14403	7.31939	29.5164	4.73851	0.192
2.36742	8.47427	9.04941	4.17883	0.255
0.504541	12.287	13.6648	5.7644	0.517
7.38007	9.49115	13.8416	3.05491	0.317
1.07654	7.22799	17.7765	3.09438	0.188
6.11247	7.49506	13.2017	3.63119	0.201
4.08998	6.46671	10.1225	3.28158	0.151
3.93546	10.0609	10.2827	7.57548	0.354
3.35121	15.7976	8.68382	4.57924	0.829
0.783945	12.5639	16.3037	2.16503	0.54
3.66166	14.845	10.5152	16.973	0.738
3.60881	10.1251	9.43845	6.42384	0.358
2.41255	8.63282	8.99633	13.4799	0.264
2.85878	7.90805	13.1103	12.1886	0.223
1.55642	10.9942	21.1323	23.8082	0.419
4.67727	6.25324	10.3652	11.8027	0.142
6.22665	7.49294	18.1058	4.53787	0.201
2.03335	11.4216	12.344	9.5216	0.451
4	6.54518	22.0946	11.0973	0.155
7.90514	6.7822	37.9992	7.62662	0.166
3.25839	9.26309	19.2087	6.7392	0.302
2.41371	8.48611	7.75228	11.1209	0.256
2.03417	8.53218	11.6089	15.5808	0.258
0.764234	9.67635	15.9198	10.9257	0.329
2.84252	16.5616	9.11996	4.22328	0.905
4.0032	20.8093	6.98376	9.69022	1.38
3.09023	11.4262	21.1821	2.69415	0.451
1.25802	8.93492	10.1175	7.41244	0.282
3.85208	9.97621	8.47483	8.61258	0.348
4.0783	9.23275	10.1941	7.98605	0.301
9.51475	9.4589	20.5471	6.04198	0.315
1.34862	14.6349	9.55816	4.09135	0.719
3.26052	10.8038	10.9342	3.28877	0.406
1.98059	11.4025	9.67459	7.19202	0.449
3.00481	18.3805	15.547	18.5592	1.1
10.5485	9.23451	12.0659	6.14684	0.301
4.92854	10.5934	10.058	10.0336	0.391
1.06383	7.35239	6.51766	5.98401	0.194
7.30994	9.51571	7.60943	3.96788	0.318
2.31696	10.1991	12.1507	7.55621	0.363
4.18585	9.91304	18.2884	10.4214	0.344
1.63693	9.30692	13.0197	7.3908	0.305
5.63063	9.6424	12.7245	10.559	0.327
3.96668	14.3084	8.88626	8.23776	0.689
2.66099	17.2534	8.08022	6.55062	0.977
1.90985	5.79013	8.92303	5.66665	0.122
2.86697	9.12298	9.74788	6.17458	0.294
2.41546	9.51128	6.00499	18.5175	0.318
3.55366	9.42651	17.3327	9.68473	0.313
2.3872	9.15752	9.17711	6.56795	0.296
2.83206	10.7303	8.96973	4.5417	0.4
3.97456	5.62845	7.73259	7.84626	0.116
5.80383	9.48359	8.7894	4.00607	0.316
5.36481	9.57619	8.47067	4.48799	0.322
2.7049	9.47213	12.752	3.03899	0.316
5.57724	7.24231	13.8748	6.11582	0.188
1.56055	14.3664	18.1166	6.726	0.694
1.15247	19.8569	3.85431	7.1748	1.27
2.6096	14.6162	15.0654	5.39116	0.717
4.03714	10.8372	15.3736	2.63309	0.408
3.88802	17.9881	5.169	8.89241	1.06
7.86164	8.04569	10.0345	5.4524	0.231
1.88218	8.66913	25.7308	6.72567	0.266
4.25713	15.2253	12.8157	2.98488	0.774
4.4484	13.8697	5.02023	3.8895	0.65
4.20521	5.7469	5.39257	13.3821	0.12
3.91389	8.73538	7.14932	8.33095	0.27
1.59388	6.59537	4.72579	12.9351	0.157
2.14869	8.23611	7.31643	4.86933	0.241
1.57704	7.78167	13.6897	3.11377	0.216
2.40154	4.36603	5.80837	6.33638	0.0705
5.32198	11.5716	12.5056	4.14873	0.462
2.62536	5.37233	16.3377	12.1881	0.106
5.50964	13.1398	10.6948	4.58569	0.587
2.62536	5.62771	9.05967	3.49918	0.116
4.14594	8.84713	10.0884	5.88548	0.277
3.51	22.0658	9.91089	3.47046	1.54
2.8401	12.2227	8.7592	9.02294	0.512
2.4079	6.58503	10.9675	7.20439	0.157
2.05846	9.03834	12.3587	11.3969	0.289
8.27815	7.69837	9.01427	18.9753	0.212
4.38404	9.55501	21.7354	5.9167	0.321
1.99322	9.0957	12.1585	3.08372	0.292
5.87199	9.75566	13.9839	3.83107	0.334
1.18864	7.26296	15.9404	5.37903	0.19
0.830427	10.6878	7.9006	7.05383	0.397
13.9276	11.7722	14.8371	14.8945	0.477
6.75676	6.74658	7.62733	11.4285	0.164
8.56164	14.5276	6.05957	11.6981	0.709
3.37838	7.82991	7.62698	7.80425	0.219
3.11915	6.48504	13.1461	5.72041	0.152
9.2081	13.866	8.43089	3.90289	0.65
3.91389	6.9356	13.6172	5.63819	0.173
4.07664	6.64034	5.62307	10.5604	0.159
2.78319	6.81641	7.93654	5.35758	0.168
1.67336	6.99143	9.99183	2.90701	0.176
4.20345	13.9246	13.6679	12.4216	0.655
2.01694	7.66774	10.7498	24.7313	0.21
0.796813	8.76769	6.49494	5.72308	0.272
1.20135	10.835	16.5366	2.32956	0.408
1.65948	8.98985	6.29257	14.5609	0.286
2.7894	18.6106	7.37267	9.40989	1.12
1.63026	13.1447	6.87208	4.94167	0.588
3.6846	11.3972	4.8658	11.7446	0.449
1.60539	14.2021	25.3151	4.3625	0.68
1.6072	20.0926	5.15887	4.90634	1.29
1.665	22.6315	8.01499	5.91178	1.61
2.86533	11.3838	13.3627	6.27932	0.448
0.791327	8.40548	11.0772	16.8464	0.251
3.6846	16.5097	6.39144	6.4362	0.9
4.17537	10.2529	8.59235	5.67228	0.367
2.11372	11.839	5.22749	7.56123	0.482
2.82008	13.9391	8.82199	9.4569	0.656
1.17	9.22111	22.5246	9.05395	0.3
2.41255	17.3577	9.30711	11.4676	0.988
2.87853	8.37477	15.7546	4.98546	0.249
3.98089	11.2372	14.2898	9.36815	0.437
7.4129	13.836	13.807	12.2603	0.647
5.33618	4.03807	6.40402	16.2022	0.0605
2.47097	9.53753	10.6683	9.45356	0.32
6.4433	8.3165	6.492	11.6446	0.246
4.12031	10.7964	16.7131	7.88976	0.405
2.57931	10.4655	10.3384	4.05462	0.382
2.02511	6.45868	4.58496	7.90472	0.151
2.60485	13.3728	7.43861	21.9145	0.607
4.11353	7.75996	7.88099	18.9949	0.215
7.14796	17.7201	5.65788	15.2839	1.03
1.55788	14.514	12.7501	6.16553	0.708
2.7137	24.0908	14.8616	7.03713	1.8
3.15159	19.8212	13.6061	24.729	1.26
1.62048	16.3299	10.0687	12.4452	0.882
11.6414	8.91234	7.52711	8.78942	0.281
2.78319	11.395	7.53505	10.6043	0.449
1.67336	11.5756	8.01182	3.5421	0.462
4.20345	8.52233	6.30078	12.9706	0.258
2.01694	9.6326	6.88795	9.52305	0.326
0.796813	9.33826	12.7333	10.1666	0.307
0.403763	5.69637	5.25012	7.27046	0.118
1.20135	4.63596	5.78619	8.41324	0.0792
1.65948	8.94358	13.3941	7.4721	0.283
2.7894	7.79671	8.34159	10.6739	0.217
1.63026	10.7289	8.5079	7.51407	0.4
3.6846	9.54624	5.0875	14.0445	0.32
1.60539	8.12683	18.1665	7.74298	0.235
1.6072	14.1097	10.3466	18.2808	0.671
0.387312	10.4017	27.8403	6.90022	0.377
0.494976	4.3531	12.4316	11.8684	0.0701
1.665	11.983	27.6442	6.15155	0.494
2.86533	8.62989	19.6323	6.68267	0.264
0.791327	4.40136	20.6063	5.72077	0.0716
4.23908	6.13835	10.8994	6.92848	0.137
1.44886	9.12406	14.5273	7.06843	0.294
1.05152	15.3381	5.68799	12.6357	0.785
4.04694	12.4581	7.80169	3.83545	0.531
3.76364	14.871	8.74587	8.38684	0.741
3.861	8.83405	19.535	6.39409	0.276
0.624844	7.91648	15.7079	6.95452	0.224
7.03235	7.21094	11.6777	6.28092	0.187
1.20091	6.50774	11.6115	4.85815	0.153
1.90658	12.0553	16.3431	5.7086	0.499
4.57666	5.60452	7.89517	18.7552	0.115
1.13507	8.90141	7.66528	5.71598	0.28
1.96271	38.5557	10.6636	15.3861	4.15
2.30521	13.2246	15.4332	6.04986	0.594
1.0866	9.717	10.8224	7.57783	0.331
1.72951	18.7203	14.7553	9.54908	1.14
2.39464	7.61504	12.9983	11.3097	0.208
7.88022	9.95255	9.11103	9.93253	0.347
0.565036	14.2465	14.8239	8.99697	0.684
1.99561	36.9404	17.6204	8.79192	3.85
0.581058	14.9952	6.30454	6.69846	0.752
2.00481	6.07914	20.6314	11.9577	0.134
1.15221	21.3573	12.7268	4.81236	1.45
1.64528	8.87861	12.8675	4.93208	0.279
1.27714	9.88062	18.2649	3.46656	0.342
2.93772	9.87059	17.5043	3.82113	0.341
8.83392	7.4177	19.3768	5.11963	0.197
1.9992	9.38408	10.6088	4.76252	0.31
1.62602	11.4488	17.131	4.05226	0.453
2.23814	14.2495	8.58271	2.41557	0.684
1.84332	12.153	19.5406	8.98584	0.507
1.6129	7.49001	13.5563	11.6879	0.201
1.05787	6.10923	18.111	4.52565	0.136
11.6822	43.857	17.9911	10.7098	5.18
9.99001	7.69805	10.1841	6.77976	0.212
3.14663	19.1915	17.8614	4.56803	1.19
1.27714	27.4684	12.2325	6.47816	2.28
5.22466	10.4851	20.0625	24.0968	0.383
3.11139	9.71815	6.65227	10.6212	0.331
2.80191	36.4421	10.6122	13.2509	3.76
2.99222	10.1599	5.43808	9.96667	0.361
0.57617	24.9555	28.1445	5.82981	1.92
1.06383	9.6011	17.8322	10.1449	0.324
4.37063	11.0707	10.7355	14.6111	0.425
4.04531	5.91728	11.6135	18.2597	0.127
2.68601	8.61662	16.118	9.92656	0.263
3.32889	13.8228	6.86111	14.31	0.646
1.29232	37.2162	10.6318	16.538	3.9
2.77008	29.4439	7.9721	4.14811	2.58
4.41696	13.6559	12.4298	13.7478	0.631
3.80807	9.16045	5.04529	17.6019	0.296
1.57208	13.1416	6.23791	9.11158	0.587
3.40948	6.37529	13.0072	7.96382	0.147
6.8918	6.3328	28.9486	10.1334	0.145
1.5569	22.7	19.742	6.50062	1.62
2.16826	11.8721	31.3016	11.096	0.485
1.52648	7.06956	5.54993	9.17103	0.18
3.84911	10.724	6.66462	7.232	0.4
7.11238	10.1221	27.4303	11.8947	0.358
1.88501	12.0482	5.84619	21.1398	0.499
0.644621	12.3392	6.28783	12.5765	0.522
5.29381	11.9723	9.47777	10.5682	0.493
2.03957	11.5374	12.4173	11.3097	0.459
0.535418	7.28564	12.9398	16.7141	0.191
5.57414	6.47914	4.22898	11.2397	0.152
1.81984	11.3356	11.3429	14.5722	0.444
2.64831	10.8342	11.9493	6.80555	0.408
3.49406	12.1422	8.02351	10.4534	0.506
1.79211	14.9368	10.6686	11.1514	0.747
1.30582	15.849	4.23876	9.40242	0.834
1.01626	14.283	6.74145	7.3515	0.687
1.83016	15.7401	11.733	17.1411	0.824
6.15764	10.6709	13.7639	6.54383	0.396
5.38503	9.17773	16.2162	13.3703	0.297
1.62022	11.4364	7.21147	4.41946	0.452
0.528905	10.4002	15.4604	6.30826	0.377
	29.8437	5.4658	6.17738	2.64
	17.703	16.6777	15.5779	1.02
	13.5275	9.04901	15.5534	0.62
	11.1724	9.12069	14.7616	0.432
	9.99367	15.0035	5.0866	0.35
	9.53605	6.70041	12.9116	0.32
	10.5563	15.8941	6.97143	0.388
	16.0874	13.7508	13.159	0.858
	73.4796	38.4222	22.0137	12.2
	9.10758	7.54114	12.6304	0.293
	15.3981	28.3422	13.3129	0.791
	10.0059	4.88594	6.59756	0.35
	12.3254	33.4118	5.99585	0.521
	15.699	11.0243	7.99369	0.82
	16.0169	10.7089	2.47157	0.851
	5.93896	8.36572	3.20891	0.128
	8.64032	15.5121	5.22382	0.265
	6.47488	13.0103	3.79923	0.152
	12.8582	9.32334	25.133	0.564
	12.5237	9.91531	6.46352	0.536
	7.45471	16.0581	13.8109	0.199
	21.3137	8.45493	7.44484	1.44
	11.5253	9.62896	9.28633	0.458
	9.68292	11.9498	7.68626	0.329
	16.2088	18.3385	13.0762	0.87
	9.3833	20.3503	5.29792	0.31
	12.4272	9.75205	12.8176	0.529
	7.31316	14.5411	7.67721	0.192
	11.5623	20.6641	8.23907	0.461
	43.8611	9.96194	8.0039	5.18
	19.5511	174.618	10.748	1.23
	14.3642	31.0564	6.43273	0.694
	11.8023	11.9105	10.4576	0.48
	9.38157	6.35331	11.7825	0.31
	6.33542	6.44142	2.89857	0.145
	12.8413	8.80217	6.20666	0.562
	9.44339	10.0817	15.8687	0.314
	13.0168	6.96387	10.471	0.577
	8.51822	13.8659	7.31585	0.258
	15.6319	6.91104	13.0908	0.813
	10.6922	15.4011	15.5628	0.398
	10.6141	20.2083	9.00309	0.392
	18.84	14.421	10.5439	1.15
	7.58389	16.5718	9.02244	0.206
	8.84067	11.6715	9.73027	0.277
	17.8534	18.6762	21.4361	1.04
	10.3628	10.3275	13.448	0.375
	10.7847	17.038	13.9711	0.404
	36.5833	20.0862	9.54791	3.79
	12.7143	8.22028	7.12729	0.552
	20.3508	10.2599	5.75309	1.32
	13.9465	6.58946	10.6913	0.657
	15.5514	9.9839	8.30168	0.805
	10.3058	15.7091	14.2993	0.371
	15.3129	12.7277	4.97189	0.782
	6.76735	8.09365	16.0067	0.165
	15.849	6.98057	6.86123	0.834
	11.8734	13.8437	15.2273	0.485
	16.4813	6.14253	13.3283	0.897
	11.0022	10.0399	10.6406	0.42
	11.9242	8.43453	7.71071	0.489
	9.87464	11.0933	6.5478	0.342
	10.5464	15.5132	8.54716	0.387
	13.0556	15.5763	3.81773	0.58
	10.6861	7.24416	6.76524	0.397
	13.02	32.0836	12.4837	0.577
	10.8496	15.4397	6.35582	0.409
	10.5553	11.1608	6.70365	0.388
	6.40605	15.3787	10.468	0.149
	9.82812	22.6533	9.49203	0.339
	18.9981	12.4878	5.28933	1.17
	14.3732	18.7383	10.6962	0.695
	12.3368	12.3144	12.9078	0.521
	11.9955	15.7636	22.4758	0.494
	14.5719	18.7257	7.19306	0.713
	9.81601	30.4904	8.36075	0.338
	8.69085	10.1468	6.15889	0.268
	17.8236	11.077	8.74744	1.04
	8.04865	12.6724	8.66897	0.231
	11.5652	18.2403	20.8149	0.461
	19.8096	9.51435	5.3818	1.26
	9.44878	6.98735	4.07936	0.314
	8.7905	8.51126	10.2164	0.274
	7.61872	11.6618	9.89654	0.208
	7.96578	6.52667	4.43056	0.226
	9.99428	12.345	20.3019	0.35
	8.27967	10.9732	2.68824	0.244
	12.2912	9.61189	2.96298	0.518
	12.5452	11.0717	16.5379	0.538
	18.5622	11.0551	18.6824	1.12
	15.9748	14.22	19.652	0.847
	17.3528	8.67872	15.1283	0.987
	34.7747	26.0121	9.06645	3.46
	13.1677	5.30638	11.4312	0.59
	10.7402	10.2474	23.6978	0.401
	19.2175	6.59684	4.39732	1.19
	9.99973	19.3593	4.22778	0.35
	24.9396	7.00919	8.77483	1.92
	38.3362	14.7229	15.0591	4.11
	11.8994	10.115	9.39689	0.487
	8.93083	20.4753	7.92166	0.282
	9.93256	24.2193	4.69894	0.346
	9.98338	7.46087	3.20866	0.349
	10.6853	9.62299	5.13234	0.397
	10.048	19.9682	7.14668	0.353
	11.5258	11.3704	4.49477	0.458
	14.3857	10.1887	3.90544	0.696
	13.8372	7.76736	11.2698	0.647
	19.5017	15.8961	7.44277	1.22
	10.2111	47.221	23.1557	0.364
	10.7802	10.4634	5.18953	0.404
	18.0291	12.7648	16.6987	1.06
	11.8352	14.9715	8.50022	0.482
	12.6678	14.9214	8.47252	0.548
	9.81635	19.8994	2.4083	0.338
	16.6003	35.2407	2.55804	0.909
	11.512	19.2055	10.1423	0.457
	9.11369	9.73861	9.26422	0.293
	11.6146	15.8652	14.879	0.465
	7.52727	35.9075	10.2531	0.203
	12.5523	14.7452	5.84894	0.539
	7.35417	21.1522	8.13679	0.194
	10.891	19.9595	24.4833	0.412
	15.4545	9.27643	12.5927	0.796
	11.1354	19.8339	15.1136	0.429
	13.4286	45.4108	6.73311	0.612
	9.70422	17.8783	9.83424	0.331
	13.5812	20.9958	13.354	0.625
	9.62679	4.61486	20.5626	0.326
	13.1288	6.00277	10.5808	0.586
	10.8598	17.0267	6.41247	0.41
	9.96492	14.3965	9.83688	0.348
	18.3331	27.5568	10.2854	1.09
	15.3661	9.30481	11.415	0.787
	14.973	14.4971	13.5384	0.75
	17.8566	7.48498	19.5426	1.04
	8.83715	17.4707	12.578	0.276
	22.3944	12.517	13.1055	1.58
	15.74	14.2061	4.83602	0.824
	9.20022	16.7619	10.1494	0.299
	16.6087	29.4536	21.3411	0.91
	14.3366	8.66512	6.96368	0.692
	12.8301	9.80611	9.15959	0.561
	14.5753	11.1798	5.69292	0.713
	12.6003	17.944	4.99767	0.543
	15.554	8.06447	15.344	0.806
	11.6189	20.5251	3.69969	0.466
	14.7991	27.1102	3.16362	0.734
	10.5823	7.63982	10.9553	0.39
	10.3472	26.0865	7.12628	0.374
	9.99419	37.7712	21.6187	0.35
	16.2176	11.8119	7.93524	0.871
	9.13884	20.2874	3.96218	0.295
	13.4818	7.84564	2.88171	0.616
	10.6532	38.196	4.47151	0.395
	9.49127	6.5445	4.60247	0.317
	17.7455	6.21915	9.6373	1.03
	11.3799	15.1929	7.53891	0.448
	15.1815	18.9361	2.071	0.77
	12.1034	8.43141	3.73353	0.503
	12.7688	11.5882	11.3677	0.556
	21.1516	11.4361	9.2714	1.42
	13.2478	9.53512	5.03402	0.596
	9.18001	7.8448	5.70778	0.297
	9.7569	14.9439	5.62473	0.334
	12.3159	11.5333	7.56547	0.52
	15.2351	42.3197	5.51546	0.775
	10.4559	26.3779	4.55179	0.381
	8.54487	6.18192	9.08347	0.259
	21.6449	6.28409	11.2238	1.48
	13.4676	11.9468	10.4377	0.615
	16.6615	7.35456	7.33674	0.916
	10.473	16.5764	5.64769	0.382
	9.14751	12.9839	4.48894	0.295
	23.7288	39.0187	8.27103	1.75
	9.28981	8.55071	11.7644	0.304
	11.8531	10.0285	7.23729	0.483
	5.87312	10.8538	17.2447	0.126
	16.154	14.5846	16.6483	0.864
	15.2439	10.6672	18.8682	0.776
	13.3994	5.80526	17.537	0.609
	10.3248	10.4071	24.9165	0.372
	12.469	11.7137	24.6995	0.532
	9.8221	8.0359	13.9781	0.338
	9.50211	17.3657	4.84135	0.318
	6.92113	4.95354	3.90973	0.173
	7.85306	11.5365	6.25946	0.22
	7.81607	6.29157	19.139	0.218
	9.66188	9.9736	18.5776	0.328
	5.68221	8.05285	5.7028	0.118
	16.5074	8.96268	22.307	0.9
	10.2436	6.65214	23.2316	0.366
	16.7199	15.8438	19.7457	0.922
	16.29	8.3692	7.90953	0.878
	9.58756	6.9939	6.38402	0.323
	8.69464	27.5718	5.10849	0.268
	10.4799	5.76692	6.36287	0.383
	12.5036	5.87817	6.28553	0.535
	13.4995	10.2119	22.1185	0.618
	10.9401	15.2791	11.4115	0.415
	6.57817	15.2629	10.6669	0.156
	10.5668	8.58221	8.91814	0.389
	10.0982	13.9586	8.27061	0.357
	11.4478	6.92132	11.6984	0.453
	8.77153	4.2379	23.1886	0.272
	13.8675	9.51934	2.54565	0.65
	11.8451	14.4336	23.5498	0.483
	13.4766	6.25191	9.98488	0.616
	16.4701	12.0762	19.3042	0.896
	5.60631	12.8657	10.8597	0.115
	9.70352	11.1747	18.6864	0.33
	12.9757	5.72874	9.55951	0.574
	14.6104	5.13058	4.51107	0.717
	11.0986	5.1713	10.8419	0.427
	10.0189	9.64235	16.6646	0.351
	10.414	10.6087	12.2644	0.378
	17.2788	6.74632	3.44577	0.979
	8.25447	14.587	2.16761	0.242
	6.16388	9.06539	6.20692	0.138
	8.51946	14.5383	5.23991	0.258
	15.4134	5.87154	3.90872	0.792
	12.6578	15.8599	6.76016	0.547
	12.3129	19.7228	8.47163	0.52
	15.324	31.6613	9.77694	0.783
	12.0114	10.5418	10.4451	0.496
	9.21607	15.6206	13.8847	0.299
	10.7635	8.11002	16.726	0.403
	9.08446	7.25678	2.91141	0.291
	10.1458	7.1235	4.43915	0.36
	8.68598	13.7553	6.96025	0.267
	15.9655	17.939	6.47962	0.846
	8.4639	11.6159	8.40502	0.254
	26.1347	9.97161	4.6349	2.09
	13.4474	21.8709	14.5936	0.613
	12.5728	6.95713	11.637	0.54
	15.8511	14.4817	17.432	0.834
	9.94635	13.3978	14.9161	0.346
	6.24551	12.9956	11.3355	0.142
	12.7858	14.403	8.21607	0.558
	12.3564	51.2615	10.2135	0.523
	13.3856	7.38955	5.95619	0.608
	9.90078	22.6015	10.9091	0.343
	13.8324	15.5578	7.23778	0.647
	13.6615	13.8515	4.20713	0.632
	11.517	30.429	10.6217	0.458
	12.7323	12.3734	15.8136	0.553
	15.3058	9.70454	12.4902	0.782
	18.3044	9.88677	3.64838	1.09
	12.9918	6.12094	5.36193	0.575
	14.6594	10.8933	6.05271	0.721
	11.2102	12.7029	11.6048	0.435
	9.24309	14.4877	3.41281	0.301
	17.9473	17.7478	7.46557	1.05
	16.1748	11.6024	11.6808	0.866
	10.2125	0	6.43741	0.364
	11.7301	8.94776	14.4562	0.474
	8.53052	9.89015	4.28709	0.258
	13.9162	16.4662	6.41335	0.654
	26.1873	10.0082	12.0473	2.09
	9.25951	11.331	6.72813	0.302
	11.7755	14.5122	8.61434	0.477
	21.0901	12.3964	7.59399	1.41
	37	5.35321	7.85722	3.86
	10.3113	10.909	5.98878	0.371
	12.0972	15.7423	7.09448	0.502
	51.6449	9.92761	16.7823	6.84
	13.822	10.2181	12.1259	0.646
	9.86877	5.99265	11.4154	0.341
	7.69919	11.9062	10.2183	0.212
	10.0379	12.1071	9.00977	0.353
	13.2012	11.2233	11.379	0.592
	13.3749	9.53241	8.29697	0.607
	34.6488	9.81511	4.74397	3.44
	11.3508	10.5858	4.4087	0.445
	13.7646	11.9138	19.2382	0.641
	8.03017	14.3842	12.3683	0.23
	4.92772	6.04502	5.01308	0.0893
	11.1597	19.1446	6.81087	0.431
	4.94403	7.60696	3.24313	0.0898
	10.6859	11.0987	18.6882	0.397
	7.76695	16.8422	9.62347	0.216
	7.88295	13.4322	20.8893	0.222
	10.2766	14.8181	14.2498	0.369
	10.2167	72.1745	4.67483	0.365
	11.1179	26.6851	11.2906	0.428
	12.6377	16.7552	4.50796	0.546
	13.3695	13.8058	4.58194	0.607
	9.68476	11.2469	8.23742	0.329
	11.1057	15.3827	7.08824	0.427
	9.25608	7.84883	3.11441	0.302
	8.86589	15.4625	2.88808	0.278
	8.37042	7.44222	9.60876	0.249
	12.2064	15.6047	5.68663	0.511
	50.8408	8.31208	9.64997	6.66
	14.1136	22.406	5.54123	0.672
	9.21371	7.2998	4.48694	0.299
	12.2337	48.1939	7.77356	0.513
	12.8963	6.84567	18.8687	0.567
	9.99485	6.54085	6.90569	0.35
	11.3957	22.7507	4.69773	0.449
	19.6937	16.2146	4.17125	1.25
	14.698	4.92134	6.86869	0.725
	10.1212	8.16937	3.73337	0.358
	9.32361	8.9273	7.50008	0.306
	10.0348	12.4188	5.99198	0.352
	9.62541	7.18173	20.8367	0.325
	8.2279	14.7937	6.48513	0.241
	24.2417	13.8713	8.82513	1.82
	29.3861	14.3392	4.78071	2.57
	13.6072	10.0394	2.78282	0.627
	37.4019	5.96416	7.75596	3.94
	12.5165	12.0303	4.23964	0.536
	10.6553	15.6977	2.3246	0.395
	16.3733	13.633	4.43451	0.886
	38.9314	7.51282	10.5838	4.22
	16.4941	5.73555	6.66457	0.899
	18.4037	6.10372	2.92899	1.1
	22.5446	8.557	14.3362	1.6
	7.43917	11.2429	2.85771	0.198
	10.4479	8.31819	3.14917	0.38
	9.10902	10.7568	18.6971	0.293
	11.7186	24.5871	2.64787	0.473
	17.1282	12.9655	12.5224	0.964
	8.44038	18.3294	9.67086	0.253
	12.2292	9.18293	7.58282	0.513
	15.3692	9.388	3.87758	0.788
	28.7219	15.9215	5.86314	2.47
	39.1596	12.6614	8.42449	4.26
	11.1957	7.48956	15.4971	0.434
	9.67287	11.1935	4.15968	0.329
	11.0184	11.3417	3.00939	0.421
	11.4496	16.2348	5.37166	0.453
	10.881	7.66222	7.21867	0.411
	33.2372	10.3326	6.81858	3.2
	20.8456	10.3608	6.78468	1.38
	28.0777	30.8419	12.5916	2.37
	19.4207	14.2259	9.23927	1.22
	8.03209	9.67949	3.63933	0.23
	27.2351	14.7814	10.1481	2.25
	13.8578	9.24808	3.77107	0.649
	14.6616	7.39573	4.47503	0.721
	12.2558	12.3359	8.32724	0.515
	10.9276	14.4538	7.33885	0.414
	12.4816	10.7674	4.84851	0.533
	23.905	12.5538	3.58641	1.78
	10.2171	8.74173	3.1954	0.365
	15.6782	9.7562	4.21806	0.818
	8.03583	8.17206	2.17667	0.23
	9.51479	8.65385	3.36516	0.318
	16.9094	10.6316	5.24051	0.941
	16.9382	10.2396	2.94807	0.944
	15.3693	13.5101	2.75761	0.788
	17.7058	12.3556	3.02956	1.02
	39.9471	10.355	15.1298	4.41
	18.348	15.021	10.853	1.09
	19.0181	8.18451	1.94066	1.17
	15.499	6.06375	4.12068	0.8
	15.0845	6.48902	7.15343	0.761
	16.4661	8.58536	6.03934	0.896
	21.0948	4.96928	4.37181	1.41
	25.2117	13.7883	2.44354	1.96
	15.412	15.466	2.91258	0.792
	21.085	14.8811	3.82873	1.41
	10.0966	10.2143	2.98718	0.357
	10.5066	7.98886	9.24028	0.385
	9.94107	5.64379	4.04244	0.346
	15.8221	7.92439	4.52854	0.832
	10.8964	19.012	2.42266	0.412
	9.52103	6.99918	13.5127	0.319
	81.1261	8.89319	22.2431	14.4
	135.01	14.4748	10.6246	31.6
	393.358	7.6767	15.3051	140
	154.809	7.19141	9.95172	38.6
	393.361	8.78117	10.5934	140
	35.121	7.7267	7.49992	3.53
	64.6894	11.0165	8.88804	9.95
	37.7512	12.9756	11.4786	4
	393.361	6.63207	8.60696	140
	13.4706	22.0201	9.51748	0.615
	11.0115	16.2108	10.8024	0.42
	10.9827	18.9445	13.7912	0.418
	10.5132	16.2319	4.45683	0.385
	11.0563	26.0031	23.9328	0.424
	13.3801	12.0745	14.3151	0.608
	7.59782	13.58	19.8212	0.207
	16.1101	8.29884	12.5634	0.86
	11.3715	5.49221	11.6423	0.447
	38.8479	5.99114	8.54454	4.2
	15.1478	8.69026	13.5414	0.767
	8.25046	8.50495	2.89823	0.242
	14.4346	16.1866	12.7071	0.701
	6.98967	16.0782	3.13499	0.176
	7.7999	11.2361	15.0115	0.217
	9.40514	14.4348	12.201	0.311
	13.5592	6.2083	9.89802	0.623
	10.9444	10.652	9.58041	0.416
	29.0789	21.7497	7.35582	2.53
	12.2799	14.155	6.07816	0.517
	15.1293	13.8793	3.16903	0.765
	11.6209	12.8568	21.4174	0.466
	35.7416	19.7465	5.28375	3.64
	17.011	18.0918	4.42819	0.952
	19.0324	24.7249	23.5294	1.17
	12.9228	9.21619	12.6597	0.569
	16.3412	10.3303	6.26912	0.883
	14.8002	18.2109	15.2637	0.734
	16.3405	13.6934	9.70276	0.883
	26.4518	9.66886	3.86811	2.13
	9.48425	7.4044	3.95789	0.316
	24.4561	12.9382	2.22492	1.85
	27.0485	13.0764	5.91514	2.22
	11.187	18.9468	5.146	0.433
	19.1907	8.97795	11.4025	1.19
	9.62371	15.5445	6.37236	0.325
	8.84996	27.1848	5.08781	0.277
	11.0592	18.8752	7.94322	0.424
	11.5611	9.12787	7.4348	0.461
	9.5876	5.15042	3.82109	0.323
	13.769	17.4972	9.44916	0.641
	29.5125	13.8189	4.33674	2.59
	13.9558	14.925	8.41097	0.658
	13.9013	7.49452	4.47633	0.653
	8.52421	9.38765	2.82749	0.258
	24.8511	10.2497	6.00337	1.9
	6.96041	14.3005	6.5436	0.175
	8.80731	7.75337	10.4332	0.275
	9.59032	11.9585	4.08514	0.323
	13.0545	18.0271	9.90226	0.58
	22.9405	5.7086	7.9161	1.65
	8.2548	8.23187	5.07341	0.242
	20.5608	23.5392	10.2427	1.35
	10.0511	13.2639	7.41026	0.353
	12.6734	10.3497	6.94258	0.549
	17.6121	13.6687	8.42211	1.01
	11.7893	6.12297	12.9138	0.479
	9.51694	21.995	2.82725	0.318
	11.3717	8.61652	5.44978	0.447
	13.8024	22.2996	3.5646	0.644
	26.6317	24.901	22.1838	2.16
	156.7	7.83301	10.8017	39.3
	17.8382	17.3566	3.13874	1.04
	8.56911	10.7374	4.78356	0.261
	10.4007	15.2002	8.19449	0.377
	13.3489	10.6844	4.07188	0.605
	8.09519	21.0265	13.1948	0.234
	11.9113	13.1404	4.65884	0.488
	104.702	5.95742	8.15575	21.4
	71.7756	26.2318	15.9361	11.8
	6.406	16.8436	9.45814	0.149
	15.5006	14.8399	8.13494	0.8
	19.2961	52.5464	6.94768	1.2
	11.0999	15.1736	10.085	0.427
	16.3974	59.8511	4.62608	0.889
	11.264	13.2012	7.29887	0.439
	11.0606	7.88269	4.19626	0.424
	12.6711	17.4158	8.26672	0.548
	11.2551	19.6163	10.3042	0.438
	13.5737	11.7258	4.77372	0.624
	7.30362	12.5772	7.56515	0.192
	17.9028	16.1714	4.54125	1.05
	9.88784	9.12527	5.66334	0.343
	19.5251	5.93037	4.43022	1.23
	13.2967	8.19096	13.4049	0.601
	12.8676	30.3986	9.55242	0.565
	11.8424	5.38218	8.06552	0.483
	21.9091	22.9357	8.0478	1.52
	10.4611	14.4989	9.32133	0.381
	8.08301	44.2309	16.0717	0.233
	9.26628	34.643	11.9062	0.303
	10.452	14.8617	10.4801	0.381
	18.4637	12.738	3.2493	1.11
	11.6949	8.30633	3.72448	0.471
	15.4675	6.37371	2.65519	0.797
	14.9777	12.2606	4.57934	0.751
	14.3763	5.72513	3.51382	0.695
	8.71236	16.2768	23.7065	0.269
	8.56461	6.645	3.29444	0.26
	7.43936	15.1981	5.47808	0.198
	9.168	26.8872	7.17639	0.297
	14.815	11.2167	18.269	0.736
	12.5835	7.8367	2.34177	0.541
	11.7113	10.7956	14.9601	0.473
	13.2184	9.9511	16.4496	0.594
	9.85762	14.4218	25.0914	0.341
	19.5927	20.3718	9.80589	1.24
	8.9145	12.1446	9.36482	0.281
	13.1681	52.2005	6.47125	0.59
	14.0022	24.3467	24.1339	0.662
	17.7468	15.0305	7.3656	1.03
	10.4149	12.4786	23.4916	0.378
	13.1286	9.96435	5.36154	0.586
	9.49175	7.28279	4.5501	0.317
	14.092	19.3127	4.87091	0.67
	9.84566	6.16746	7.79622	0.34
	16.1101	10.961	10.3063	0.86
	16.2864	13.8844	4.69492	0.878
	8.09952	8.87927	6.38984	0.234
	18.923	12.171	22.2808	1.16
	12.8318	30.5746	4.96145	0.562
	9.49821	12.6976	8.52207	0.317
	6.15347	15.0254	15.748	0.138
	11.7392	10.3207	12.4674	0.475
	30.0961	6.86536	4.16232	2.68
	10.4013	5.19577	4.21397	0.377
	10.7661	9.61401	4.30861	0.403
	46.5368	31.1256	4.951	5.73
	10.4624	10.2316	20.1518	0.382
	10.2883	5.85047	4.96296	0.37
	11.6254	23.739	16.9736	0.466
	22.3173	19.432	6.6323	1.57
	9.64975	8.19424	3.73391	0.327
	24.9089	15.4976	4.95774	1.91
	19.7821	4.62297	13.6685	1.26
	10.3709	14.4702	22.4026	0.375
	9.62618	22.3186	11.1978	0.325
	11.518	9.3079	13.4081	0.458
	7.12108	23.8675		0.182
	8.11205	11.2896		0.234
	5.27855	4.81789		0.102
	12.6389	6.73951		0.546
	11.8369	11.1589		0.482
	13.5	18.3617		0.618
	11.3068	13.3073		0.442
	15.785	8.30878		0.828
	9.82766	7.34995		0.339
	14.0457	13.7309		0.666
	18.3498	13.497		1.09
	13.0239	9.03627		0.578
	8.03171	10.2921		0.23
	13.7558	32.4078		0.64
	11.5921	33.0718		0.463
	10.9726	8.03155		0.418
	11.7542	9.45218		0.476
	11.7669	6.94142		0.477
	46.4187	8.83215		5.71
	15.7789	7.74439		0.827
	10.6823	0		0.397
	11.8283	25.0113		0.482
	25.1574	13.5335		1.95
	8.21974	14.5392		0.24
	13.1269	5.8356		0.586
	22.881	11.0306		1.64
	19.3703	13.5006		1.21
	17.3858	19.3582		0.991
	8.26574	14.1706		0.243
	11.2937	8.35364		0.441
	36.1322	22.5293		3.71
	9.05571	17.6902		0.29
	10.5462	4.72118		0.387
	13.8813	8.52979		0.651
	12.2373	10.365		0.514
	11.9915	7.52154		0.494
	11.4027	8.26853		0.449
	39.2497	15.4655		4.28
	19.795	10.5672		1.26
	23.8187	13.2588		1.76
	10.6689	10.4187		0.396
	8.92561	6.23349		0.282
	13.8812	15.3036		0.651
	36.1636	13.4599		3.71
	13.8557	9.43679		0.649
	10.5991	9.82703		0.391
	9.9322	10.732		0.346
	9.97841	13.9368		0.349
	11.1903	7.15039		0.434
	17.0941	14.1019		0.96
	5.32515	12.8124		0.104
	12.5781	5.52976		0.541
	13.6707	7.18487		0.633
	9.96558	17.2457		0.348
	12.5631	7.39106		0.54
	10.9351	8.37279		0.415
	8.69418	4.08317		0.268
	11.1083	5.95367		0.428
	12.2586	37.6043		0.515
	6.76115	10.7932		0.165
	9.8672	13.7585		0.341
	12.4013	22.86		0.527
	50.0401	13.69		6.49
	31.645	12.5406		2.93
	22.4824	14.8667		1.59
	32.1699	6.15227		3.02
	21.887	15.6542		1.51
	11.6566	16.2931		0.468
	21.1976	16.4177		1.43
	25.6938	12.5282		2.02
	15.1144	7.97202		0.764
	21.1878	19.6537		1.43
	12.3746	9.75605		0.524
	13.5196	17.3929		0.62
	7.79084	7.24172		0.217
	17.3773	9.87792		0.99
	10.5433	15.0357		0.387
	20.0094	15.5024		1.28
	11.022	7.33225		0.421
	12.0943	29.392		0.502
	8.34937	10.7766		0.248
	8.84015	11.9231		0.277
	9.59646	8.15311		0.324
	11.2495	7.35875		0.438
	9.97273	24.5333		0.348
	27.1878	8.2915		2.24
	20.9842	16.4021		1.4
	17.219	14.1728		0.973
	16.5414	10.492		0.903
	10.3439	16.0275		0.373
	12.4268	29.2474		0.529
	32.457	7.82953		3.07
	8.55346	12.8103		0.26
	12.8129	12.2212		0.56
	7.42282	7.25512		0.198
	13.1715	18.7502		0.59
	9.61387	14.6725		0.325
	12.7372	10.9089		0.554
	21.679	7.1402		1.49
	14.1827	16.5112		0.678
	12.3454	14.1932		0.522
	11.0498	11.6003		0.423
	12.2646	7.64599		0.516
	23.3302	6.70443		1.7
	19.6056	8.41956		1.24
	5.43578	5.96381		0.108
	13.1387	6.38624		0.587
	15.3549	9.23581		0.786
	26.2438	9.78218		2.1
	11.5114	5.14485		0.457
	47.3962	10.8962		5.92
	11.3538	9.29397		0.446
	13.332	16.6457		0.604
	10.9065	28.0682		0.413
	21.1829	8.66103		1.43
	53.5532	4.38948		7.27
	7.97801	17.6881		0.227
	16.7592	12.5564		0.926
	17.2515	7.0897		0.977
	14.6188	28.2798		0.717
	20.6466	17.6323		1.36
	20.8148	34.179		1.38
	12.2341	8.87513		0.513
	15.1962	7.78648		0.771
	22.1319	7.03217		1.54
	10.3155	6.95061		0.371
	14.8332	7.62729		0.737
	5.28037	4.06615		0.102
	14.203	7.32525		0.68
	12.2305	6.689		0.513
	12.4986	8.16402		0.534
	13.8519	12.2574		0.649
	15.6509	12.769		0.815
	16.0056	5.39735		0.85
	9.60026	11.5659		0.324
	8.95932	8.68636		0.284
	11.6578	4.90722		0.468
	37.9136	21.2994		4.03
	11.523	8.10404		0.458
	8.88495	16.0424		0.279
	16.6912	13.4247		0.919
	10.7281	16.2428		0.4
	9.19502	11.7505		0.298
	9.85389	9.25027		0.34
	8.01658	5.98055		0.229
	8.58236	10.4396		0.261
	9.95971	16.3104		0.347
	10.3693	15.9742		0.375
	10.872	30.2726		0.41
	10.4054	19.3893		0.378
	10.2579	15.1601		0.367
	14.3138	15.3108		0.69
	9.15708	7.82113		0.296
	14.1998	11.2872		0.679
	9.52514	7.45435		0.319
	9.69764	12.9608		0.33
	16.6367	15.6965		0.913
	12.7312	12.9802		0.553
	16.4626	9.82592		0.895
	7.5565	14.6371		0.205
	9.37331	8.16995		0.309
	10.7081	10.7389		0.399
	28.2008	6.41711		2.39
	18.48	18.2351		1.11
	8.6602	10.1021		0.266
	12.8697	17.8032		0.565
	13.4361	18.351		0.612
	10.3408	10.9378		0.373
	7.56666	14.978		0.205
	19.7847	12.1589		1.26
	46.0141	13.0498		5.63
	13.8591	6.01037		0.649
	14.1825	15.2557		0.678
	11.1743	9.24085		0.432
	16.7672	17.3318		0.926
	15.7765	8.74731		0.827
	17.6825	5.61128		1.02
	7.25438	10.6163		0.189
	9.09848	6.69774		0.292
	10.1892	13.0819		0.363
	11.897	8.27954		0.487
	9.1929	13.8241		0.298
	9.52826	7.79001		0.319
	11.9772	10.1373		0.493
	19.7608	12.8147		1.25
	9.24333	7.47328		0.301
	11.0007	10.4278		0.42
	16.9869	13.1607		0.949
	10.8423	9.41233		0.408
	27.5305	11.3598		2.29
	13.2529	10.2799		0.597
	16.0598	12.9724		0.855
	22.1663	20.3593		1.55
	17.1466	9.98642		0.966
	7.96556	20.8081		0.226
	10.8771	21.2006		0.411
	10.1868	7.28491		0.363
	14.2744	20.5561		0.686
	12.4268	10.3188		0.529
	10.232	5.36576		0.366
	46.1372	15.7818		5.65
	18.4895	13.7714		1.11
	19.8416	23.4479		1.26
	14.0468	11.1411		0.666
	9.39368	9.07517		0.311
	11.3362	34.6512		0.444
	11.8363	27.0315		0.482
	10.0122	8.32086		0.351
	10.7057	12.3073		0.399
	4.36942	12.9845		0.0706
	13.6462	47.292		0.631
	21.3653	8.97757		1.45
	9.94776	17.8429		0.347
	12.0807	8.88371		0.501
	14.0539	6.97585		0.666
	9.93786	18.1954		0.346
	16.2653	12.337		0.876
	12.3203	30.7769		0.52
	13.2033	13.4082		0.593
	8.3868	10.7637		0.25
	21.3271	10.2188		1.44
	16.5898	11.3698		0.908
	21.0471	10.2379		1.41
	5.8368	20.4078		0.124
	12.5091	11.1038		0.535
	7.45524	7.4676		0.199
	24.549	18.4783		1.86
	10.7142	14.1926		0.399
	15.7	37.638		0.82
	11.3754	24.3126		0.447
	8.95272	16.0844		0.283
	7.45573	13.3008		0.199
	13.2509	22.9814		0.597
	10.1416	14.4331		0.36
	10.7149	12.2721		0.399
	13.1148	11.1395		0.585
	9.44809	19.8387		0.314
	9.59616	39.0661		0.324
	24.3434	7.01185		1.84
	5.9784	18.9419		0.13
	12.3718	11.4215		0.524
	24.0384	12.3068		1.79
	13.4093			0.61
	12.2453			0.514
	14.2786			0.686
	13.8264			0.646
	10.0195			0.351
	10.7521			0.402
	13.4069			0.61
	11.8817			0.486
	12.8712			0.565
	8.53438			0.258
	10.516			0.385
	8.43642			0.253
	11.5623			0.461
	12.1072			0.503
	8.37335			0.249
	18.5942			1.12
	15.7419			0.824
	20.7566			1.37
	11.497			0.456
	6.54482			0.155
	11.6444			0.467
	11.994			0.494
	7.05424			0.179
	11.3087			0.442
	9.06845			0.29
	9.7043			0.331
	9.46121			0.315
	9.76941			0.335
	7.05515			0.179
	16.9547			0.946
	13.3031			0.601
	17.8244			1.04
	7.56445			0.205
	13.4173			0.611
	9.6052			0.324
	6.49064			0.152
	10.3479			0.374
	9.38204			0.31
	12.7891			0.558
	10.6275			0.393
	11.4705			0.454
	9.58376			0.323
	12.2764			0.517
	31.8935			2.98
	8.37928			0.25
	8.57587			0.261
	14.1638			0.676
	7.10155			0.181
	10.2433			0.366
	12.4649			0.532
	13.0614			0.581
	11.3045			0.442
	9.1732			0.297
	5.60372			0.115
	5.67512			0.118
	7.67139			0.211
	15.0392			0.756
	14.8854			0.742
	8.00179			0.228
	7.55751			0.205
	18.5317			1.11
	33.9901			3.33
	17.3048			0.982
	12.7327			0.553
	17.5149			1
	13.6928			0.635
	16.3355			0.883
	12.7215			0.553
	11.9295			0.489
	11.062			0.424
	16.4247			0.892
	17.397			0.992
	17.3553			0.988
	16.2417			0.873
	9.69116			0.33
	9.32654			0.306
	12.4161			0.528
	12.6551			0.547
	17.3659			0.989
	14.0475			0.666
	10.2408			0.366
	6.56488			0.156
	7.74689			0.215
	11.5357			0.459
	18.7425			1.14
	20.329			1.32
	12.5596			0.539
	14.7745			0.732
	10.8477			0.409
	8.32603			0.247
	17.1765			0.969
	46.9973			5.83
	9.28424			0.304
	11.1745			0.432
	8.55592			0.26
	10.1957			0.363
	16.7201			0.922
	9.18518			0.298
	9.5404			0.32
	8.46926			0.255
	16.5331			0.902
	11.883			0.486
	16.0432			0.853
	10.7914			0.405
	15.4031			0.791
	25.9012			2.05
	8.31915			0.246
	6.54757			0.155
	18.3327			1.09
	25.9365			2.06
	23.8291			1.77
	13.7142			0.636
	13.532			0.621
	13.7689			0.641
	17.8953			1.05
	9.09624			0.292
	15.6208			0.812
	7.18004			0.185
	14.8374			0.738
	9.84856			0.34
	12.1595			0.507
	13.2524			0.597
	19.9381			1.28
	39.9623			4.41
	12.2964			0.518
	11.3657			0.446
	11.7667			0.477
	11.1342			0.429
	13.336			0.604
	9.20982			0.299
	17.0458			0.955
	37.9156			4.03
	11.1949			0.434
	11.2039			0.435
	24.8414			1.9
	17.0188			0.952
	10.9024			0.413
	15.6364			0.814
	19.8203			1.26
	9.6596			0.328
	10.268			0.368
	14.357			0.694
	7.06092			0.179
	10.5633			0.389
	15.2552			0.777
	15.5141			0.802
	32.0046			2.99
	11.093			0.426
	14.2357			0.683
	7.3377			0.193
	12.1262			0.505
	11.6634			0.469
	19.2932			1.2
	17.8375			1.04
	13.5837			0.625
	24.8581			1.91
	10.8891			0.412
	13.821			0.646
	19.8438			1.26
	10.9378			0.415
	10.3965			0.377
	14.8484			0.739
	11.2303			0.436
	12.4162			0.528
	10.8773			0.411
	17.332			0.985
	19.8045			1.26
	19.9427			1.28
	10.3477			0.374
	40.0452			4.43
	16.0251			0.852
	12.9167			0.569
	10.4651			0.382
	9.16133			0.296
	9.98004			0.349
	10.1802			0.362
	8.24776			0.242
	15.218			0.773
	12.2111			0.511
	11.7211			0.473
	7.40515			0.197
	15.5334			0.804
	7.98605			0.228
	11.5938			0.464
	10.1884			0.363
	17.4738			1
	12.3734			0.524
	14.9739			0.75
	21.7485			1.5
	10.1601			0.361
	10.4006			0.377
	31.9265			2.98
	12.9141			0.568
	12.6501			0.547
	9.42896			0.313
	9.45748			0.315
	20.3486			1.32
	10.6282			0.393
	6.80296			0.167
	11.0453			0.423
	11.3026			0.442
	13.3115			0.602
	16.7386			0.923
	9.90211			0.344
	8.64425			0.265
	11.1843			0.433
	16.4362			0.893
	11.9618			0.492
	41.0859			4.63
	10.5884			0.39
	8.7528			0.271
	9.53012			0.319
	12.7382			0.554
	19.0391			1.17
	10.3199			0.372
	23.0289			1.66
	21.1652			1.42
	13.5222			0.62
	17.493			1
	17.0476			0.955
	9.13951			0.295
	15.9026			0.84
	13.3755			0.607
	9.29187			0.304
	16.1647			0.865
	12.327			0.521
	12.4143			0.528
	17.1805			0.969
	15.6771			0.817
	8.93433			0.282
	8.3658			0.249
	55.6106			7.74
	19.1066			1.18
	9.62288			0.325
	9.89839			0.343
	19.2033			1.19
	9.45426			0.314
	9.36514			0.309
	12.5406			0.538
	10.8763			0.411
	12.9608			0.572
	9.00762			0.287
	11.6505			0.468
	11.7019			0.472
	12.4015			0.527
	13.514			0.619
	6.24497			0.141
	8.75553			0.271
	11.2859			0.441
	9.67528			0.329
	7.77596			0.216
	13.7507			0.64
	7.964			0.226
	16.3895			0.888
	8.58338			0.261
	9.78297			0.336
	8.10556			0.234
	12.576			0.541
	9.75328			0.334
	9.90881			0.344
	27.5966			2.3
	15.5205			0.802
	10.1353			0.359
	7.16252			0.184
	11.518			0.458
	10.851			0.409
	7.56138			0.205
	8.47174			0.255
	15.0576			0.758
	19.9859			1.28
	27.3706			2.27
	9.61083			0.324
	7.97171			0.227
	11.3693			0.447
	11.3983			0.449
	10.6231			0.393
	12.3624			0.523
	10.9881			0.419
	12.7987			0.559
	14.9077			0.744
	19.5288			1.23
	12.6406			0.546
	12.1803			0.509
	12.0944			0.502
	10.4478			0.38
	7.59413			0.207
	10.9346			0.415
	8.13711			0.236
	9.86834			0.341
	12.3652			0.524
	13.1178			0.585
	7.6498			0.209
	9.89822			0.343
	16.8684			0.937
	16.145			0.863
	10.6445			0.394
	8.36948			0.249
	12.1407			0.506
	49.5177			6.37
	24.207			1.82
	15.0799			0.76
	12.2935			0.518
	9.45727			0.315
	9.77297			0.335
	10.2183			0.365
	10.758			0.402
	10.0722			0.355
	8.79673			0.274
	10.9058			0.413
	10.0844			0.356
	10.8749			0.411
	9.77821			0.335
	7.95208			0.226
	8.61305			0.263
	9.35847			0.308
	14.8173			0.736
	7.51218			0.202
	18.4265			1.1
	7.80049			0.217
	12.8139			0.56
	10.1245			0.358
	14.3788			0.696
	7.98104			0.227
	11.2691			0.439
	9.86642			0.341
	14.2662			0.685
	6.85701			0.17
	37.949			4.04
	19.8088			1.26
	12.9148			0.568
	16.5705			0.906
	9.03002			0.288
	14.1309			0.673
	10.8009			0.405
	8.04033			0.231
	6.8648			0.17
	22.6843			1.61
	17.4502			0.998
	13.13			0.586
	9.83354			0.339
	9.003			0.286
	12.4062			0.527
	12.3225			0.52
	12.6677			0.548
	21.6424			1.48
	8.87988			0.279
	14.5623			0.712
	12.1512			0.507
	17.6865			1.02
	20.1665			1.3
	10.8927			0.412
	14.4749			0.704
	12.6501			0.547
	10.0688			0.355
	10.4605			0.381
	17.2644			0.978
	6.55609			0.155
	15.3092			0.782
	12.0104			0.496
	13.4185			0.611
	7.76369			0.215
	9.47561			0.316
	19.7746			1.26
	9.33091			0.307
	10.7325			0.4
	11.2952			0.441
	10.8547			0.409
	12.5826			0.541
	15.3			0.781
	11.587			0.463
	16.4086			0.89
	16.4452			0.894
	27.9652			2.36
	16.6926			0.919
	12.8468			0.563
	11.3851			0.448
	8.14252			0.236
	14.8414			0.738
	15.8339			0.833
	7.25452			0.189
	14.5237			0.709
	8.32851			0.247
	15.1459			0.767
	21.7733			1.5
	19.8525			1.27
	17.3692			0.989
	19.3564			1.21
	10.6773			0.397
	9.26952			0.303
	11.0074			0.42
	14.9062			0.744
	21.6501			1.48
	15.7469			0.824
	11.6873			0.471
	14.0899			0.67
	13.1393			0.587
	11.3798			0.448
	15.4044			0.791
	24.127			1.81
	8.71743			0.269
	8.74033			0.271
	12.3556			0.523
	14.4584			0.703
	8.70335			0.268
	9.51859			0.319
	39.4037			4.31
	10.728			0.4
	9.74087			0.333
	5.66133			0.117
	14.9556			0.749
	10.7573			0.402
	12.3998			0.526
	15.0563			0.758
	14.1735			0.677
	9.49958			0.317
	16.9736			0.948
	8.7373			0.27
	9.16836			0.297
	12.295			0.518
	7.13516			0.183
	11.0606			0.424
	10.1833			0.362
	10.9854			0.419
	8.69751			0.268
	16.5078			0.9
	11.9637			0.492
	5.68529			0.118
	15.5855			0.809
	7.11902			0.182
	8.39206			0.25
	8.80405			0.274
	13.0011			0.576
	14.619			0.717
	7.71011			0.213
	14.5763			0.714
	14.3544			0.693
	13.4295			0.612
	6.92826			0.173
	11.6853			0.471
	13.4386			0.613
	7.81772			0.218
	9.49116			0.317
	16.519			0.901
	12.7599			0.556
	23.5115			1.72
	14.6171			0.717
	10.0669			0.355
	10.7539			0.402
	14.0707			0.668
	56.9383			8.06
	12.9447			0.571
	7.56399			0.205
	11.4316			0.451
	14.1854			0.678
	8.92939			0.282
	15.4472			0.795
	12.5784			0.541
	11.6446			0.467
	11.9263			0.489
	8.8924			0.28
	33.0155			3.16
	9.64072			0.326
	15.5697			0.807
	17.6628			1.02
	14.5853			0.714
	8.50466			0.257
	13.8173			0.645
	19.6447			1.24
	95.8152			18.7
	10.6791			0.397
	13.1256			0.586
	23.2282			1.69
	39.4961			4.33
	11.2022			0.434
	35.0307			3.51
	12.9984			0.575
	20.3874			1.33
	9.64129			0.326
	10.5431			0.387
	8.89206			0.28
	13.7162			0.637
	17.0695			0.958
	7.34208			0.194
	12.0067			0.495
	9.75673			0.334
	11.7877			0.478
	10.2893			0.37
	11.3601			0.446
	12.21			0.511
	10.6564			0.395
	13.2852			0.6
	16.1537			0.864
	11.6192			0.466
	9.27712			0.303
	12.2647			0.516
	11.0598			0.424
	9.6908			0.33
	12.3821			0.525
	10.6285			0.393
	17.326			0.984
	13.1822			0.591
	12.8621			0.564
	11.4605			0.454
	10.4057			0.378
	22.7768			1.63
	8.70001			0.268
	7.89869			0.223
	3.61815			0.0488
	65.3212			10.1
	14.9133			0.745
	17.1706			0.968
	8.18464			0.239
	10.4106			0.378
	13.8362			0.647
	6.48602			0.152
	20.9777			1.4
	10.2101			0.364
	17.3943			0.992
	18.3747			1.1
	10.9199			0.414
	11.988			0.494
	10.0955			0.356
	10.1587			0.361
	11.4394			0.452
	20.1847			1.3
	9.6637			0.328
	9.2501			0.302
	10.388			0.376
	13.1025			0.584
	9.98292			0.349
	13.3683			0.607
	6.17299			0.138
	7.89773			0.223
	12.9466			0.571
	12.6755			0.549
	12.3521			0.523
	11.8345			0.482
	16.5658			0.906
	8.6961			0.268
	11.2785			0.44
	9.09743			0.292
	8.59264			0.262
	14.9768			0.751
	20.4487			1.34
	15.9623			0.845
	19.6511			1.24
	21.5272			1.47
	32.9377			3.15
	16.9746			0.948
	7.07479			0.18
	16.2028			0.869
	11.8396			0.482
	9.76797			0.335
	9.26402			0.302
	7.74432			0.214
	8.91754			0.281
	9.33565			0.307
	13.3113			0.602
	10.1101			0.357
	10.4734			0.382
	13.2262			0.595
	14.127			0.673
	11.2052			0.435
	17.1194			0.963
	10.1412			0.36
	25.3317			1.97
	11.2174			0.436
	12.8787			0.565
	14.5664			0.713
	7.20749			0.187
	10.6847			0.397
	13.8011			0.644
	8.78223			0.273
	8.21095			0.24
	10.1862			0.363
	15.8944			0.839
	10.6942			0.398
	11.5405			0.46
	15.2499			0.776
	5.49327			0.11
	21.3668			1.45
	8.36423			0.249
	18.9708			1.16
	12.989			0.575
	7.92721			0.224
	10.6683			0.396
	11.2949			0.441
	11.6787			0.47
	6.10539			0.135
	12.9463			0.571
	12.5566			0.539
	9.4739			0.316
	15.6607			0.816
	10.4434			0.38
	6.94581			0.174
	10.5463			0.387
	8.83724			0.276
	10.0151			0.351
	15.7278			0.822
	11.2112			0.435
	13.8022			0.644
	9.37732			0.31
	16.754			0.925
	9.90943			0.344
	19.6667			1.24
	12.0793			0.501
	7.45483			0.199
	10.4118			0.378
	8.18144			0.238
	19.3356			1.21
	12.8491			0.563
	27.1289			2.23
	13.1808			0.591
	7.02848			0.178
	12.7067			0.551
	9.95031			0.347
	24.2269			1.82
	9.07179			0.291
	14.4744			0.704
	11.7035			0.472
	9.92793			0.345
	12.6952			0.55
	15.3256			0.784
	12.7031			0.551
	8.39555			0.25
	7.991			0.228
	11.802			0.48
	8.8509			0.277
	12.7564			0.555
	7.5028			0.202
	7.91786			0.224
	8.88274			0.279
	10.8814			0.411
	10.9707			0.418
	16.2378			0.873
	6.07602			0.134
	12.6006			0.543
	6.92856			0.173
	14.4899			0.706
	12.0542			0.499
	12.0648			0.5
	18.5528			1.12
	20.2829			1.32
	11.2743			0.44
	8.62663			0.264
	14.8569			0.739
	11.4864			0.456
	12.9148			0.568
	8.37339			0.249
	8.2883			0.244
	7.27516			0.19
	12.8903			0.566
	14.331			0.691
	9.44372			0.314
	14.3802			0.696
	5.50379			0.111
	24.8751			1.91
	15.4855			0.799
	13.7159			0.637
	17.9133			1.05
	7.75427			0.215
	9.45901			0.315
	9.58166			0.323
	6.47567			0.152
	8.24623			0.242
	16.5999			0.909
	10.1598			0.361
	5.43736			0.108
	6.39005			0.148
	13.9449			0.657
	7.63518			0.209
	7.3522			0.194
	6.77454			0.166
	10.9516			0.416
	8.31534			0.246
	7.88472			0.222
	6.31734			0.145
	7.56751			0.205
	10.8925			0.412
	7.59565			0.207
	9.93075			0.345
	8.90299			0.28
	13.8368			0.647
	8.28242			0.244
	5.95118			0.129
	9.04463			0.289
	9.97202			0.348
	5.42134			0.108
	11.061			0.424
	6.83162			0.168
	13.0661			0.581
	13.3969			0.609
	8.02534			0.23
	6.9068			0.172
	12.1201			0.504
	12.9847			0.574
	9.20715			0.299
	6.33206			0.145
	15.6267			0.813
	8.57282			0.261
	6.82643			0.168
	14.9258			0.746
	7.30114			0.191
	10.084			0.356
	9.77201			0.335
	11.3486			0.445
	7.60848			0.207
	7.81119			0.218
	7.41181			0.197
	8.10869			0.234
	10.061			0.354
	13.4741			0.616
	9.18887			0.298
	7.41824			0.197
	7.88947			0.222
	5.55395			0.113
	5.60356			0.115
	7.55873			0.205
	7.09714			0.181
	8.04846			0.231
	6.21375			0.14
	393.312			140
	4.55088			0.0764
	5.93291			0.128
	7.0977			0.181
	9.10481			0.293
	7.85473			0.22
	2.99531			0.0336
	3.8968			0.0564
	5.13873			0.0969
	6.67168			0.161
	7.19025			0.186
	10.2147			0.364
	2.98788			0.0335
	2.97799			0.0332
	3.57317			0.0476
	3.21034			0.0385
	4.55502			0.0766
	2.36586			0.0211
	5.14431			0.0971
	3.34747			0.0419
	8.64138			0.265
	6.22847			0.141
	3.59736			0.0482
	5.53285			0.112
	3.62624			0.049
	4.05884			0.0611
	4.15308			0.0639
	5.33431			0.104
	6.14911			0.137
	3.07956			0.0355
	5.63661			0.116
	5.02475			0.0927
	3.65178			0.0497
	5.73964			0.12
	14.8077			0.735
	6.39599			0.148
	9.76495			0.334
	8.24119			0.242
	10.2479			0.367
	5.21446			0.0997
	8.788			0.273
	1.93245			0.0142
	14.0976			0.67
	17.2093			0.972
	14.3224			0.69
	9.82934			0.339
	9.0792			0.291
	17.8059			1.04
	27.6083			2.3
	23.9667			1.78
	14.6416			0.72
	19.5062			1.23
	15.1935			0.771
	8.7484			0.271
	8.34891			0.248
	15.6402			0.814
	8.45134			0.254
	4.19285			0.0651
	18.177			1.08
	13.6056			0.627
	11.151			0.431
	7.47918			0.201
	11.4536			0.453
	14.2795			0.687
	7.86731			0.221
	17.0893			0.96
	8.99976			0.286
	16.3067			0.88
	11.2636			0.439
	4.86055			0.0869
	8.64751			0.265
	5.69696			0.118
	12.3679			0.524
	10.8699			0.41
	3.78623			0.0533
	4.10306			0.0624
	20.4337			1.33
	11.7777			0.478
	7.68377			0.211
	7.363			0.195
	7.98497			0.227
	6.49346			0.153
	6.3575			0.146
	11.0715			0.425
	6.29172			0.144
	8.60838			0.263
	15.0586			0.758
	16.4625			0.895
	11.076			0.425
	7.17356			0.185
	12.7723			0.557
	5.85481			0.125
	12.1778			0.509
	12.5822			0.541
	17.6396			1.02
	9.16979			0.297
	9.19051			0.298
	10.867			0.41
	8.06067			0.232
	7.62373			0.208
	10.4719			0.382
	6.5174			0.154
	5.66266			0.117
	11.3678			0.447
	4.10697			0.0625
	6.96816			0.175
	16.364			0.885
	13.9893			0.661
	9.7846			0.336
	11.6953			0.471
	4.57477			0.0772
	9.62872			0.326
	12.9238			0.569
	12.4803			0.533
	8.60887			0.263
	7.40376			0.197
	12.1584			0.507
	18.7399			1.14
	11.6473			0.468
	5.3645			0.105
	11.9326			0.49
	8.5992			0.262
	7.72369			0.213
	11.4943			0.456
	17.8935			1.04
	7.45501			0.199
	14.5963			0.715
	14.1603			0.676
	7.77613			0.216
	6.43565			0.15
	9.27107			0.303
	10.0372			0.353
	10.0464			0.353
	7.56823			0.205
	4.84456			0.0863
	11.5121			0.457
	11.5047			0.457
	11.009			0.42
	12.2747			0.516
	10.4632			0.382
	16.2866			0.878
	5.47245			0.109
	12.0318			0.497
	12.1662			0.508
	10.8229			0.407
	8.02987			0.23
	7.72151			0.213
	7.16092			0.184
	6.57724			0.156
	11.2016			0.434
	12.5795			0.541
	8.16078			0.237
	7.35052			0.194
	12.2263			0.513
	13.555			0.623
	7.12125			0.182
	9.57904			0.322
	14.6997			0.725
	10.1652			0.361
	12.9366			0.57
	15.9164			0.841
	12.8401			0.562
	10.3408			0.373
	20.3545			1.32
	14.6433			0.72
	10.4412			0.38
	8.75591			0.272
	16.5615			0.905
	10.3531			0.374
	6.84103			0.169
	9.27022			0.303
	15.3006			0.781
	15.3726			0.788
	12.4631			0.532
	7.48686			0.201
	9.55933			0.321
	3.86816			0.0556
	5.09381			0.0952
	8.34507			0.248
	11.1227			0.429
	12.4132			0.528
	11.6572			0.468
	13.2079			0.593
	7.06173			0.179
	7.27788			0.19
	5.79933			0.123
	6.17567			0.138
	4.83764			0.0861
	6.60765			0.158
	6.53786			0.155
	13.1082			0.585
	10.9801			0.418
	6.53709			0.155
	10.1212			0.358
	8.28704			0.244
	12.0159			0.496
	4.07794			0.0617
	6.27896			0.143
	5.47928			0.11
	3.66375			0.05
	52.5558			7.05
	8.37042			0.249
	7.65			0.209
	6.27804			0.143
	5.64032			0.116
	6.44639			0.15
	5.00778			0.0921
	5.90381			0.127
	7.67102			0.211
	4.3079			0.0686
	8.44202			0.253
	9.59104			0.323
	4.91005			0.0886
	4.90976			0.0886
	4.20392			0.0654
	6.04464			0.133
	6.50278			0.153
	24.1232			1.81
	25.7534			2.03
	7.97748			0.227
	5.76997			0.121
	7.42321			0.198
[truncated: 1,158 more rows]
