# Supplementary material for: Quantification of protein abundance and interaction defines a mechanism for operation of the circadian clock
Source: eLife journal article supplement (doi:10.7554/elife.73976), 2022-03-14
Supplement: supp [file elife_poa_e73976_Figure_2_figure_supplement_1.pdf › elife_poa_e73976_Figure_2_figure_supplement_1.pdf]

**A**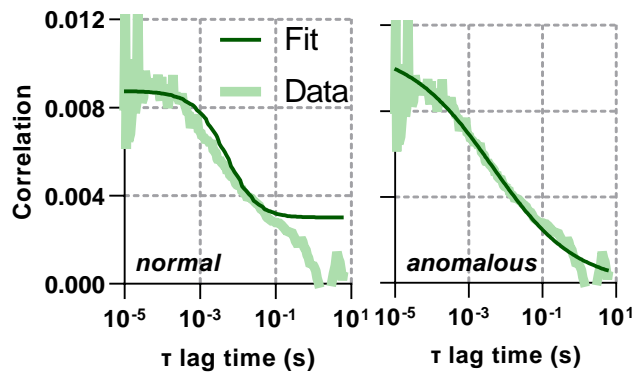**B**NIH/3T3-  
Solo-expressed

BMAL1::EGFP

tagRFP::CLOCK

EGFP

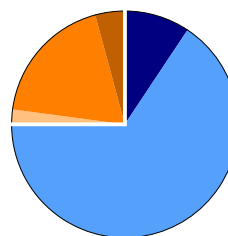

Total=214

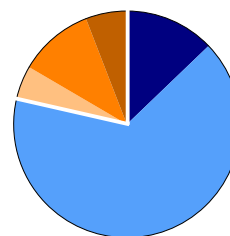

Total=187

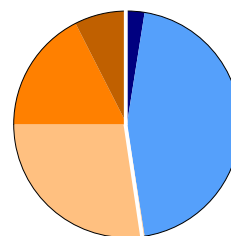

Total=40

NIH/3T3-

NLS::EGFP-tagRFP::CLOCK

NLS::EGFP

tagRFP::CLOCK

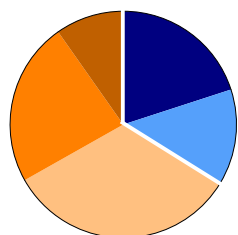

Total=205

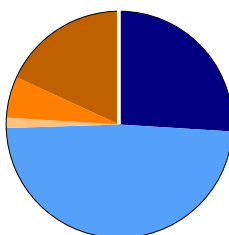

Total=204

NIH/3T3-

BMAL1::EGFP-tagRFP::CLOCK

BMAL1::EGFP

tagRFP::CLOCK

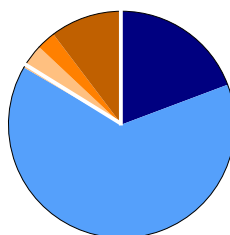

Total=223

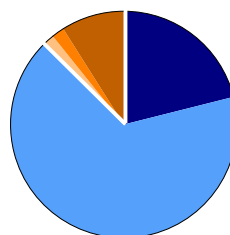

Total=223

NIH/3T3-

EGFP::CLOCK-BMAL1::tagRFP

BMAL1::EGFP

tagRFP::CLOCK

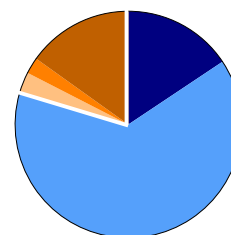

Total=1157

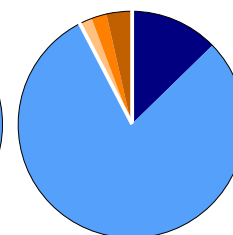

Total=1158

NIH/3T3-

BMAL1 L95E::EGFP-tagRFP::CLOCK

BMAL1::EGFP

tagRFP::CLOCK

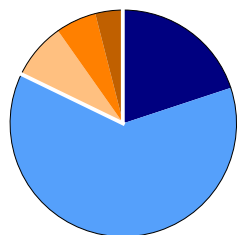

Total=276

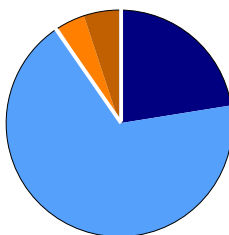

Total=276

NIH/3T3-

BMAL1 V435R::EGFP-tagRFP::CLOCK

BMAL1::EGFP

tagRFP::CLOCK

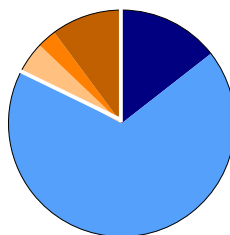

Total=256

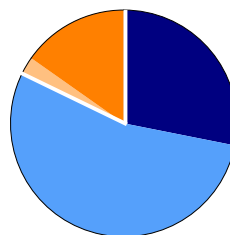

Total=256

■ anomalous

■ anomalous + triplet

■ normal

■ normal + triplet

■ normal 2 components
