# Supplementary material for: Quantification of protein abundance and interaction defines a mechanism for operation of the circadian clock
Source: eLife journal article supplement (doi:10.7554/elife.73976), 2022-03-14

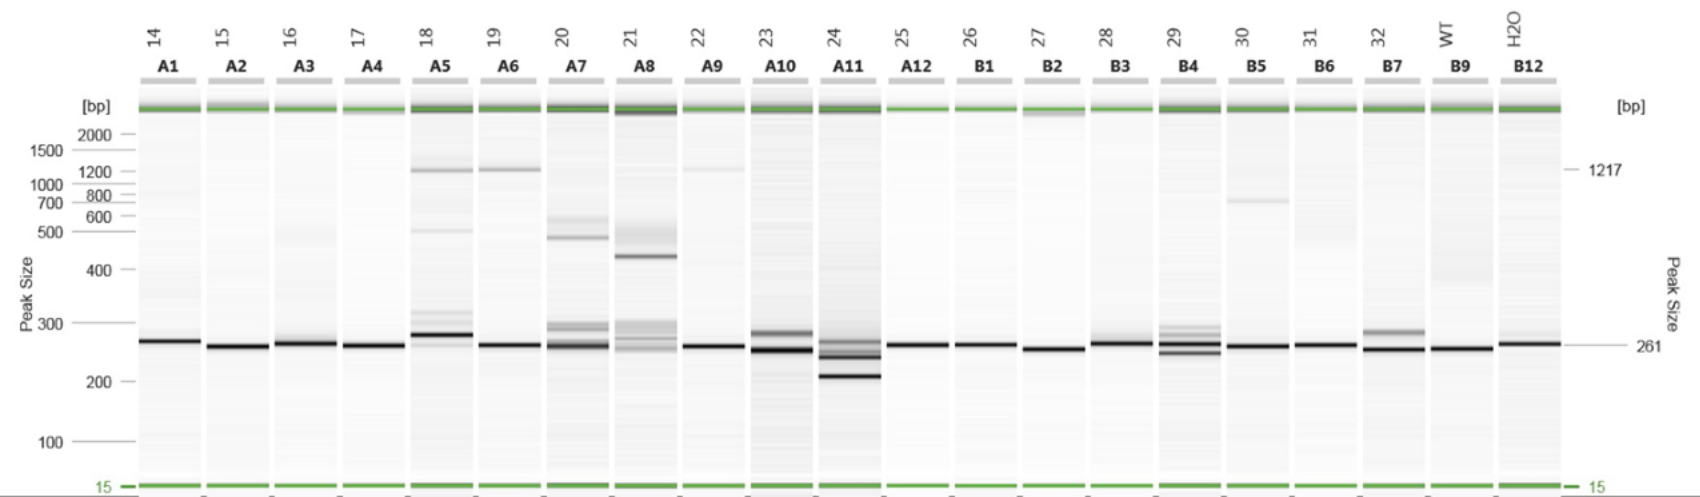

Supplement: supp [file elife_poa_e73976_Figure_3_figure_supplement_1_source_data_1.pdf › elife_poa_e73976_Figure_3_figure_supplement_1_source_data_1.pdf]
