# Supplementary figures and images for: Quantification of protein abundance and interaction defines a mechanism for operation of the circadian clock
Source: eLife journal article supplement (doi:10.7554/elife.73976), 2022-03-14

**A**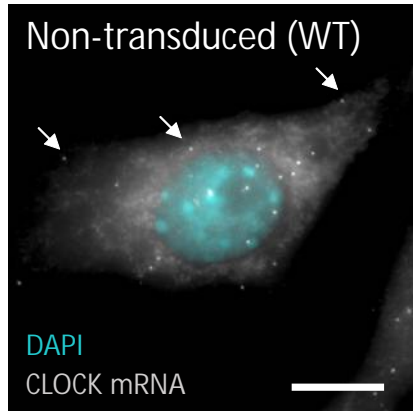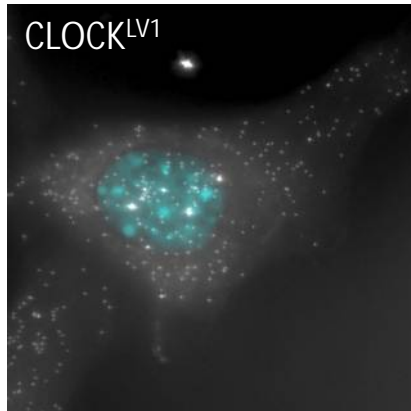**B**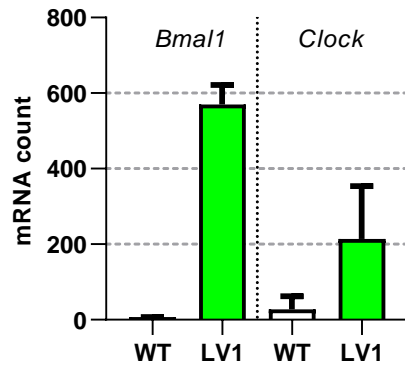

Supplement: supp [file elife_poa_e73976_Figure_1_figure_supplement_1.pdf › elife_poa_e73976_Figure_1_figure_supplement_1.pdf]

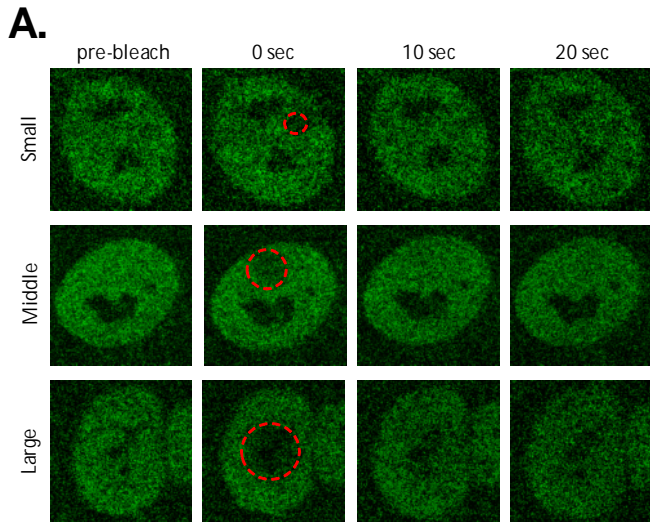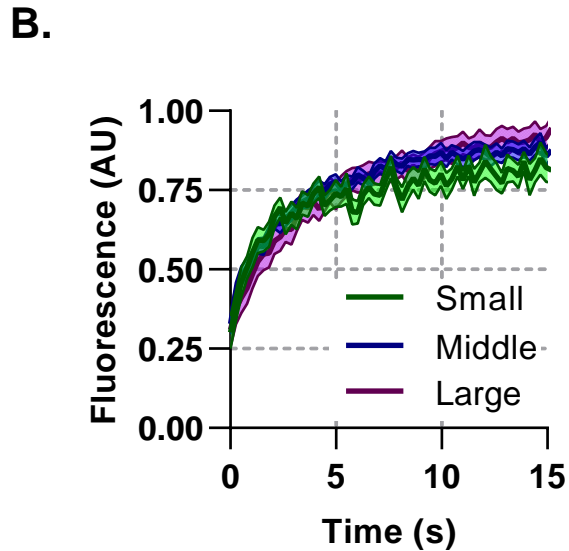

Supplement: supp [file elife_poa_e73976_Figure_1_figure_supplement_2.pdf › elife_poa_e73976_Figure_1_figure_supplement_2.pdf]

**A.**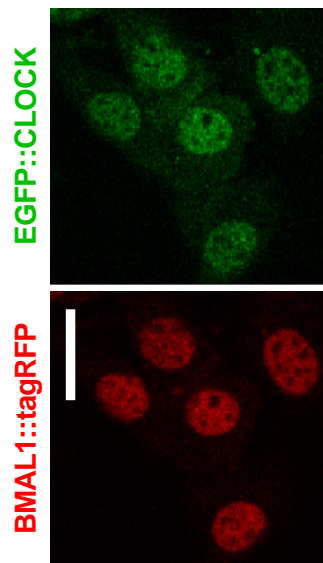**B.**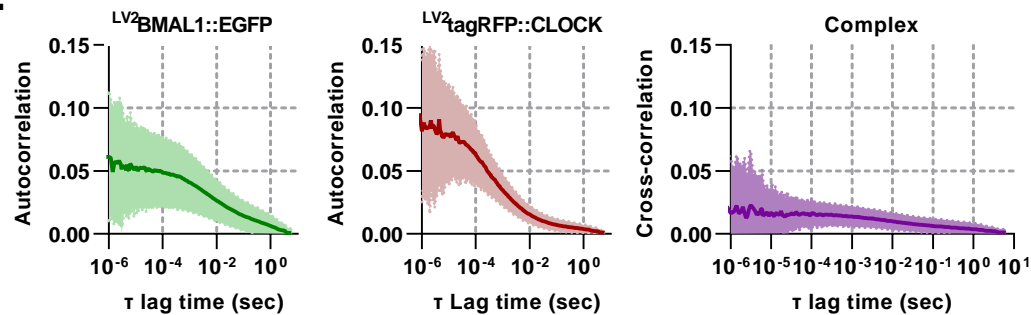**C.**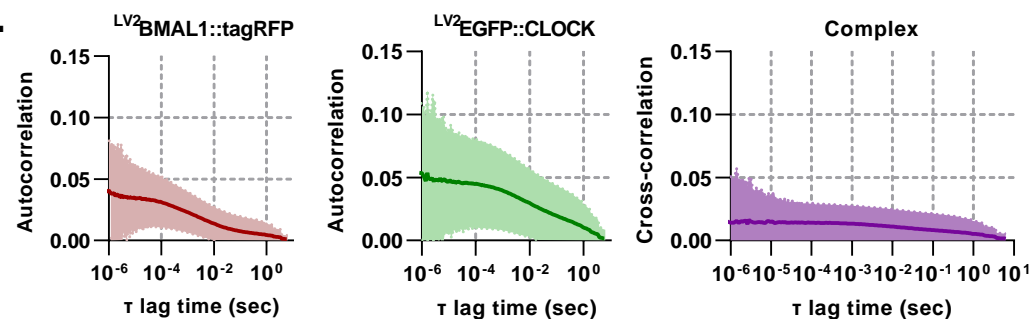**D.**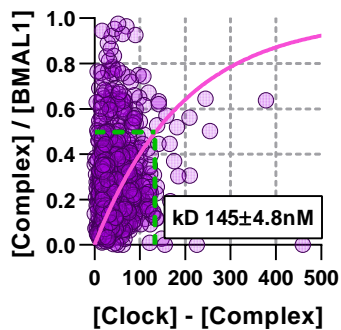**E.**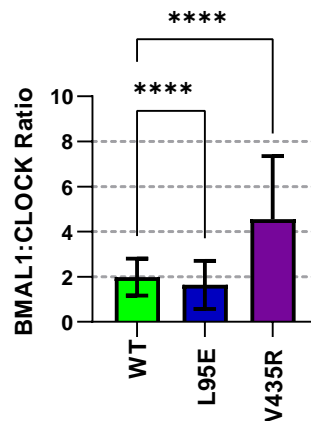**F.**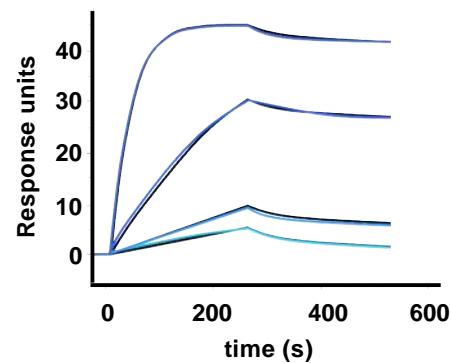

Supplement: supp [file elife_poa_e73976_Figure_2_figure_supplement_2.pdf › elife_poa_e73976_Figure_2_figure_supplement_2.pdf]

**A.**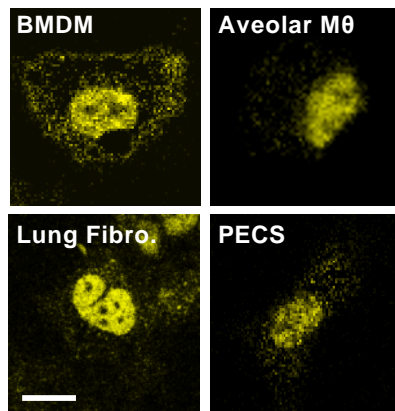**B.**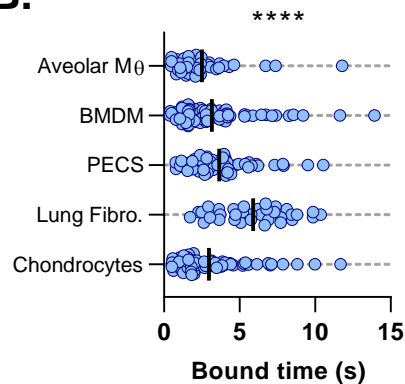**C.**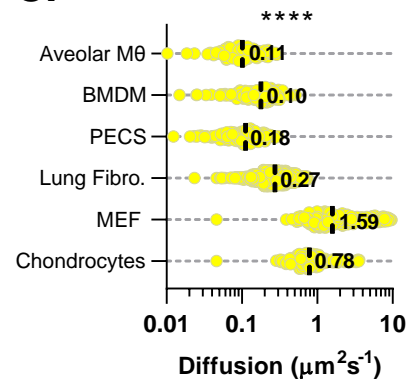**D.**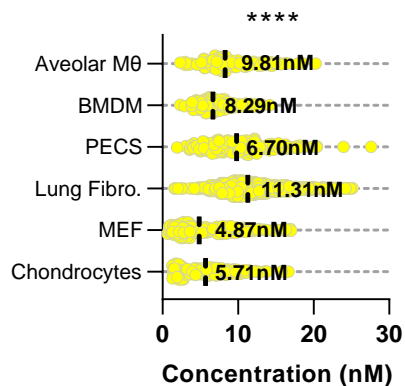**E.**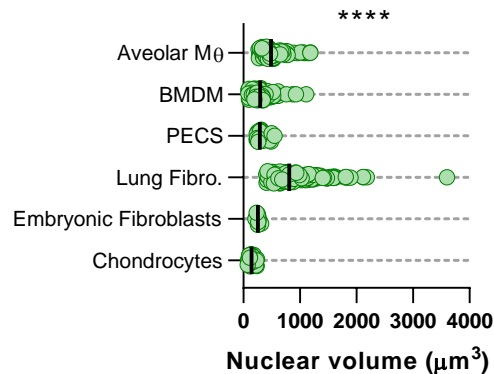**F.**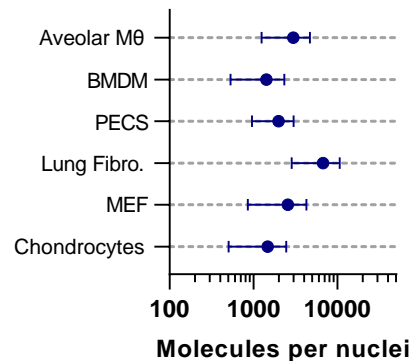

Supplement: supp [file elife_poa_e73976_Figure_3_figure_supplement_1.pdf › elife_poa_e73976_Figure_3_figure_supplement_1.pdf]

**A**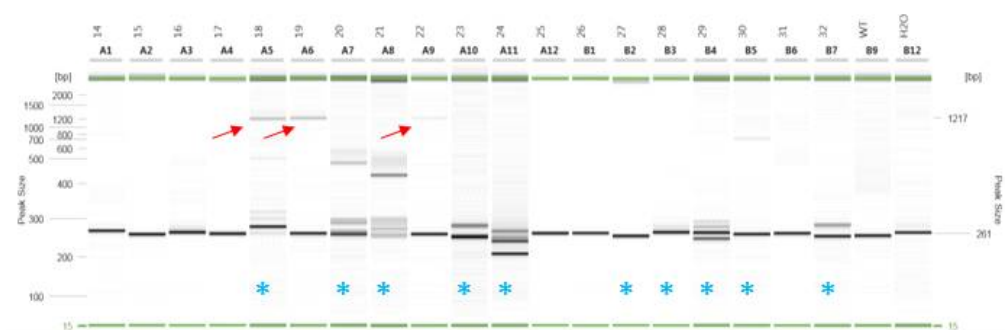**B**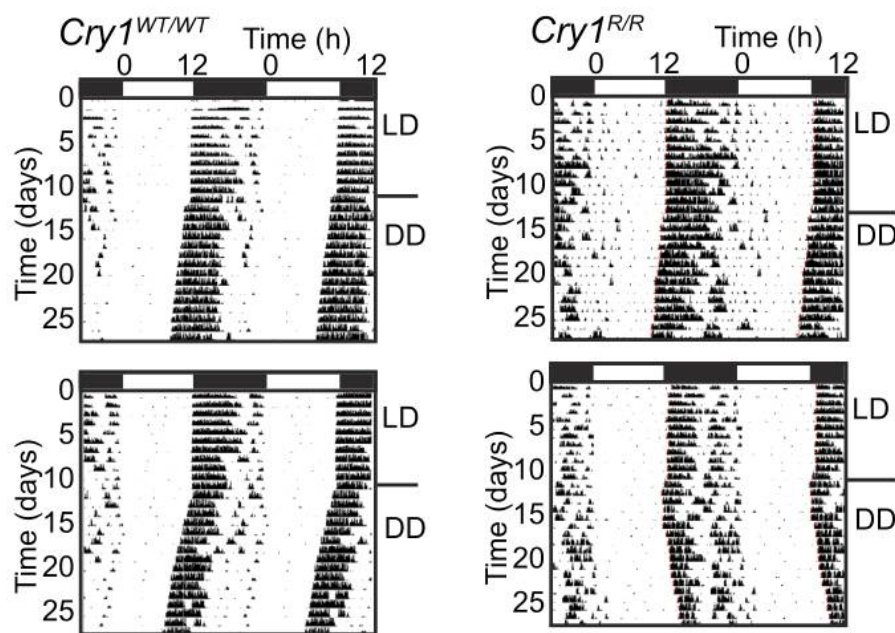**C**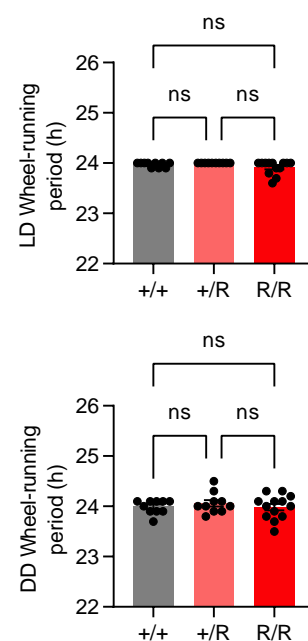**D**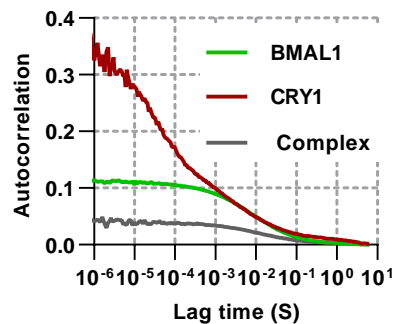**E**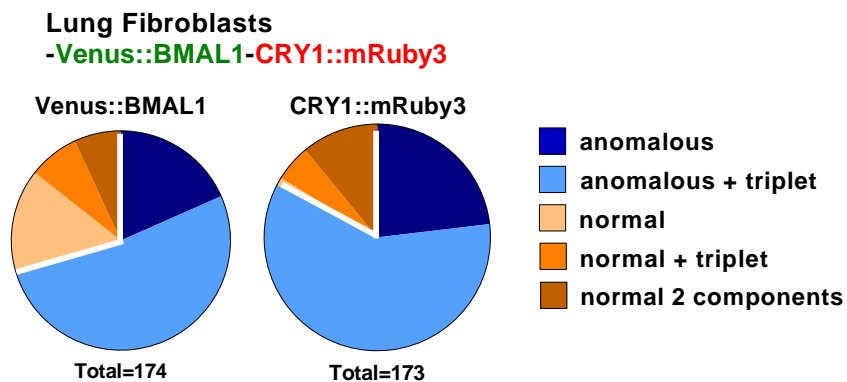

Supplement: supp [file elife_poa_e73976_Figure_3_figure_supplement_2.pdf › elife_poa_e73976_Figure_3_figure_supplement_2.pdf]

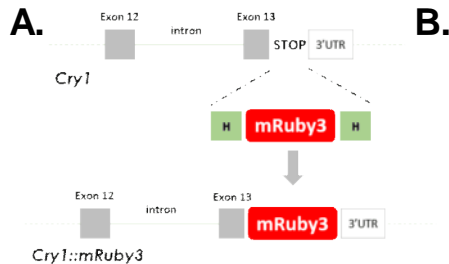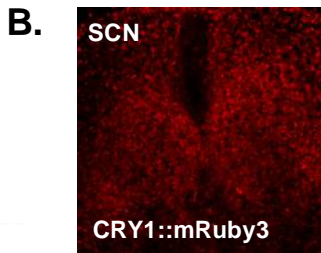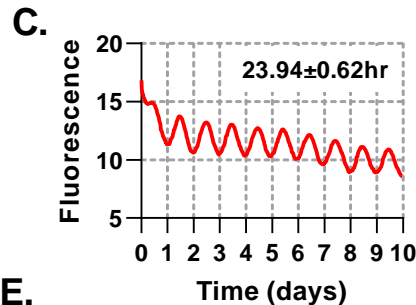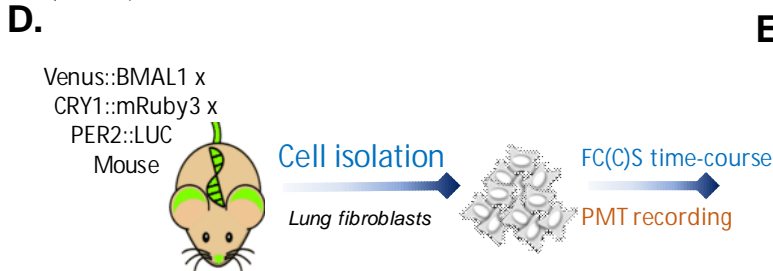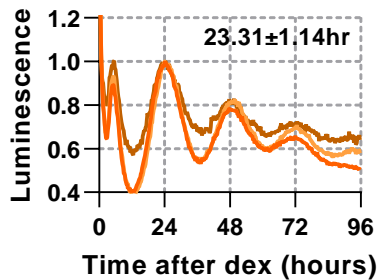

Supplement: supp [file elife_poa_e73976_Figure_3_figure_supplement_3.pdf › elife_poa_e73976_Figure_3_figure_supplement_3.pdf]

**A.**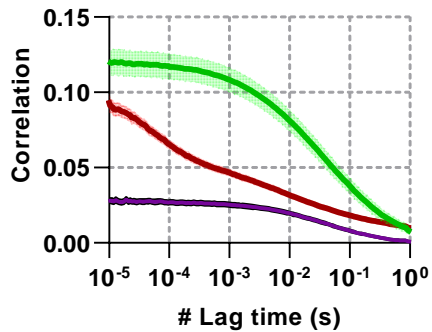**B.**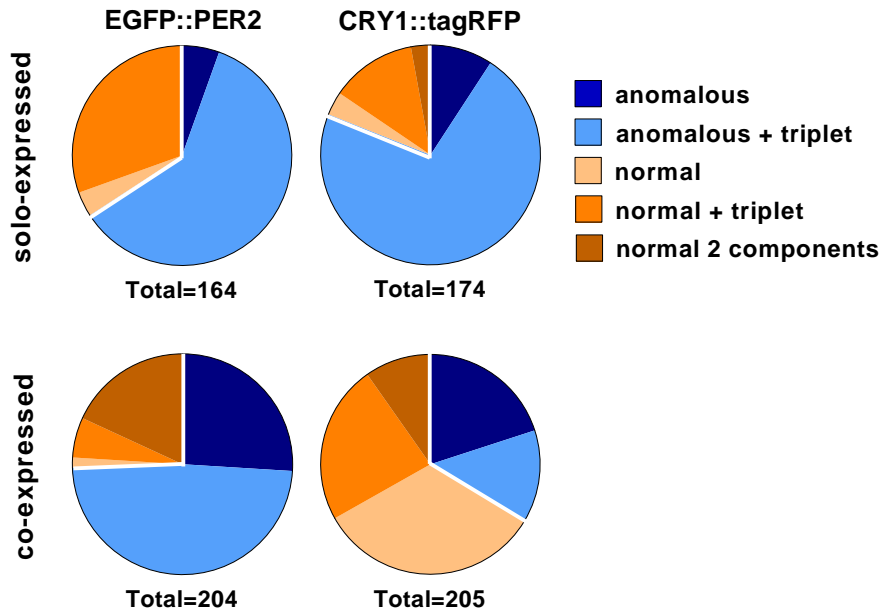

Supplement: supp [file elife_poa_e73976_Figure_4_figure_supplement_1.pdf › elife_poa_e73976_Figure_4_figure_supplement_1.pdf]

**A**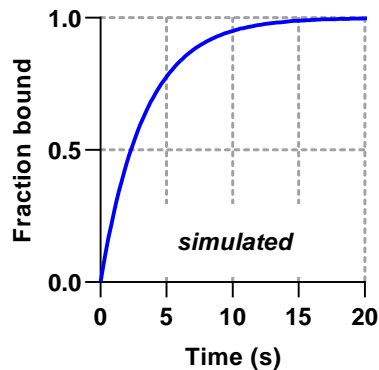**B**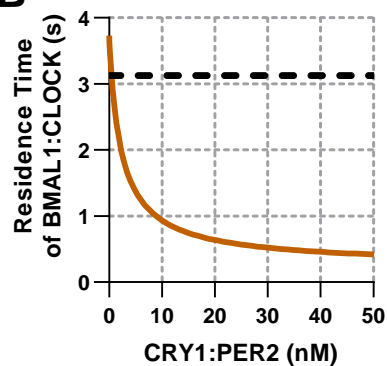**C**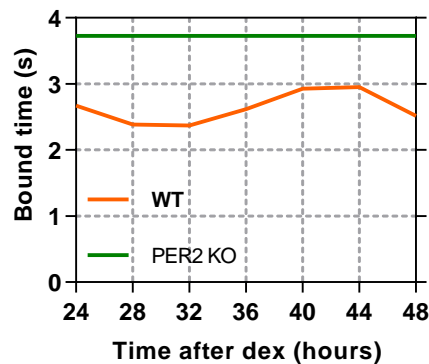**D**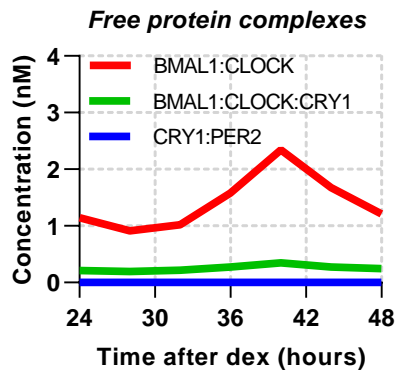**E**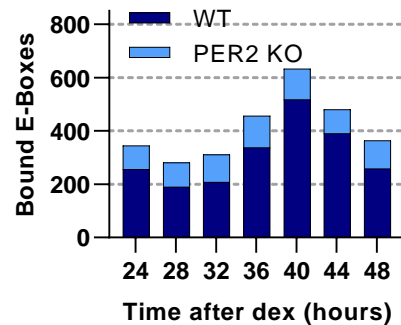**F**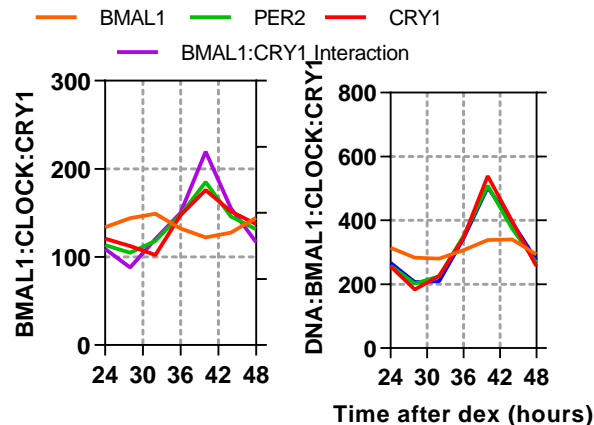

Supplement: supp [file elife_poa_e73976_Figure_5_figure_supplement_1.pdf › elife_poa_e73976_Figure_5_figure_supplement_1.pdf]

**A**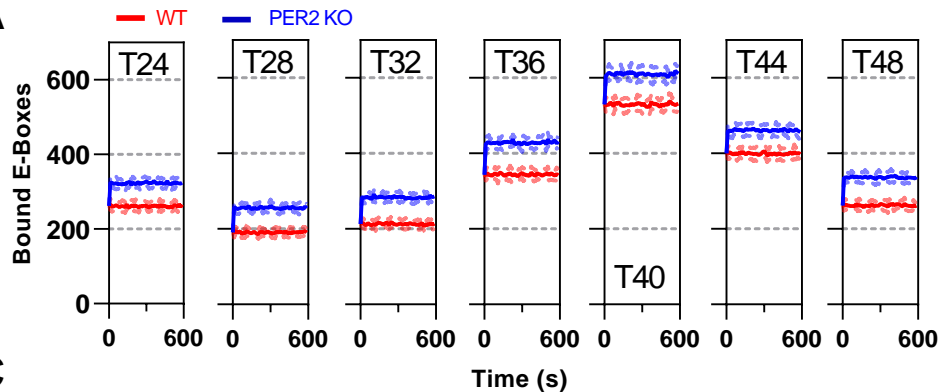**B**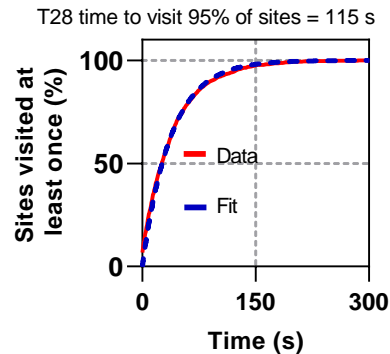**C**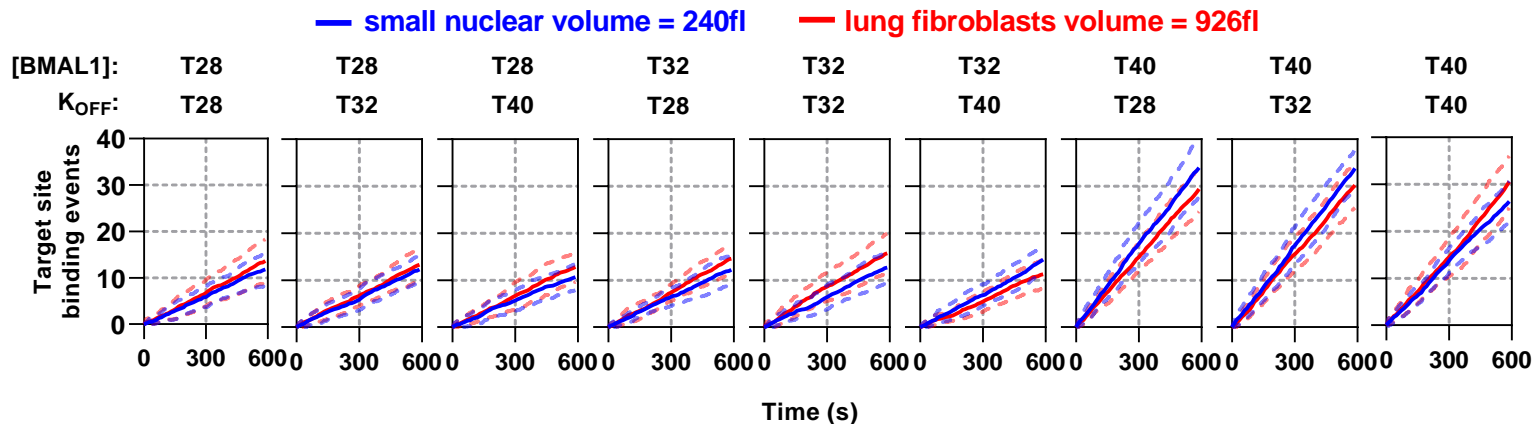

Supplement: supp [file elife_poa_e73976_Figure_7_figure_supplement_1.pdf › elife_poa_e73976_Figure_7_figure_supplement_1.pdf]
